# Supplementary material for: Stock trend prediction using sentiment analysis
Source: PeerJ journal article supplement (doi:10.7717/peerj-cs.1293), 2023-03-20
Supplement: Dataset.zip [file Dataset.zip]

## Sheet: Sheet1
text	sentiment
RT @RobertBeadles: Yo💥 Enter to WIN 1,000 Monarch Tokens✅ US Stock Market Crashes &amp; what we can LEARN from them PT3! RETWEET, WATCH video…	positive
#SriLanka surcharge on fuel removed! ⛽📉 The surcharge of Rs.26 imposed on diesel and petrol has been revoked with effect from midnight on June 23 says Power, Energy and Transport Minister Mahinda. Amaraweera -Adaderana- #lka #FuelPrices #taxes #economy #stocks #StockMarket	negative
Net issuance increases to fund fiscal programs &gt; yields spike higher &gt; risk off: #stocks and #EMFX correct lower &gt; #Fed comes in with #YCC &gt; stocks to new all time highs with 20% unemployment and -25% GDP. Fin.	positive
RT @bentboolean: How much of Amazon's traffic is served by Fastly? Help us find out by running this tool from your IP address: https://t.co…	positive
$AMD Ryzen 4000 desktop CPUs looking ‘great’ and on track to launch in 2020 https://t.co/y7yYvXOVYJ #madtweets #stocks #cnbc #AMD	positive
RT @QuantTrend: Reduce your portfolio RISK! GOLD is a perfect tail HEDGE! Central banks balance sheet expansion &amp; large fiscal deficits &amp;…	positive
$863.69 Million in Sales Expected for Spirit AeroSystems Holdings, Inc. $SPR This Quarter https://t.co/zoqBvspVSj #stocks	positive
RT @ArjunKharpal: #Apple has cut the prices of the iPhone 11 range by about 12-13% in China. It's an uncommon move. These discounts are n…	negative
RT @SMA_alpha: The #CDC U.S. New Case data has a 2 day lag, but saw another encouraging decline #WHO Global New Case data still flat at the…	negative
Where to Look for Dependable Dividends Read More &gt; https://t.co/qKvNFF2ih5 #etf #investing #stocks #business #news	neutral
RT @PipsToDollars: Earnings $AMZN $TSLA $MSFT $AAPL $AMD $BA $FB $LUV $MMM $GE $AAL $UPS $TWTR $PFE $CBSH $PEP $MA $GOOGL $GILD $SBUX $UAL…	neutral
Guys if market stays below 10000 till 2 expect a major major crash in nifty #nifty #banknifty #stocks	negative
How will the future fly for Spirit Air $SAVE ? #Blog with Stocks&amp;Sports on $FB 🤖 Bots &amp; AI also welcome to blog about #salesforce $CRM @Tommycoulter4 https://t.co/SBae6qvO6p	neutral
Interesting comparison to 2007-09 market of $SPX stocks above 200 day. Much of 2008 bear market was under that 50 level marked by red line. Once it got above 65% level in summer 2009 the smoke cleared. Not as weak in 2020 but something to watch https://t.co/eWP915CcBj	negative
#CANBK CANBK 25-Jun-2020 , Now @ 93++++++++++++++++ #nifty #banknifty #equity #stocks #analysis #trading #sp https://t.co/OSGXfbjKqf	neutral
4/ that is, Spot premium. No major price peaks during this phase. During distribution, funding stays largely positive &amp; futures trade at premium constantly. So, constant spot premium is a precursor to organic demand $BTC #BTC #Bitcoin #TA #SP500	positive
Chile: On The Road to Recovery in 2021? https://t.co/xp152EE1hm $AAPL $TSLA $FB https://t.co/cHvzQi7Fv3	neutral
RT @ForecastCity: Latest #EURNZD #TradeIdeas &amp; #TechnicalAnalysis is FREE now! 2686 pip #Profit in 82 days! #Euro #EUR #NZD #Money #Forex…	positive
$VIR Since April i posted these levels Just follow the thread and the levels for support &amp; resistance / SL &amp; TP . $SPX #nasdaq #TechnicalAnalysis #StockMarket #daytrading $SPY $QQQ $IWM https://t.co/SsJ3JYbP0v https://t.co/2J0zIly9Yy	positive
@EpiphronR China Population 1.3 Billion Reasons $30 $IQ IQIYI &amp; $GLUU Short Squeeze Bullish Call Especially w New Sorcerer's Arena Game NetFlix Is At All Time High $NFLX $DIS Netflix +4.7% to record high as Imperial bumps PT https://t.co/h2HBNi7ir0 $AMZN $INTC $SNAP $AAPL $AMAT	neutral
RT @RafKadian: $tsla &amp; $nio fot the day #trading #stocks #RafTrading111 @adssgroup https://t.co/zwFA8po9YI	neutral
Q1 2020 EPS Estimates for Merck &amp; Co., Inc. $MRK Lowered by SVB Leerink https://t.co/vi2fdhysb8	negative
RT @JohriNikhil: 3 of 8 #banks that infused confidence capital in #YesBank sold partial stakes from the "free from lock-in" portion at btw…	negative
RT @Reveretrading: As promised, June 17 Plan *Click on Picture to Expand* 📌 Please feel free to share or like, I would appreciate your su…	neutral
8911.....IT IS THE BEST TIME TO COVER YOUR SHORTS #banknifty #trading #stocks #stockmarket #news #gold #silver #coronavirus #Nifty #equity #portfolio #markets #research #results #daytrading #finance #investments #intraday #India #stockstowatch #StocksToTrade https://t.co/VjBrk7ugr0	positive
RT @FreeShyloNow: GM #Shylobots 🤖 🌄☕ 3202🎯 LIS🔺 #ES_F $SPX $SPY ☝3202🎯📈😈 3209🎯 3220🎯 3229🎯 3232🎯 👎 3202🎯📉🐻 3194🎯 3189🎯 3182🎯 3177🎯 31…	neutral
There are cases where investing in a taxable account over an IRA makes sense. If you’re in a high income tax bracket, paying the lower capital gains tax rate on sales could save you on your tax bill. #stocks #markets #economy @StegentEquity Stegent Equity Advisors, Inc https://t.co/K6hex2nGOK	positive
#OfficeSupply orders up significantly as #USA shifted to #workfromhome. See more data: https://t.co/W29QPIicmd #Covid19 #alternativedata #HomeOffice #OfficeDepot #OfficeMax #Shopping #Staples #FedExKinkos #USPS #DHL #TNTExpress $ODP $CIO $FDX $UPS $HPP $HIW $HYG $AMZN $EBAY $M https://t.co/mx1GzTY6wo	positive
#stocks making it too easy at times. #OptionsTrading is my new love and it’s here to stay! https://t.co/NaktOndY98	positive
$T Jul 14 - Daily stock market timing forecast - ◆ Investing view =&gt; Buy - Bullish ◆ Search for the daily stock market timing forecast https://t.co/cgw2OmhClQ ◆ Upper~Lower stock... https://t.co/5iEpNwOVuI https://t.co/vdb3vvRLNX	positive
RT @leadlagreport: Several large corporations are stopping advertising on Facebook either till July or for the whole of this year. If these…	negative
$AMZN nice little coiling here.	positive
TOS frozen for anyone else? #es_f $spx $spy #options #futures #cl_f $forex	neutral
#NASDAQ E-mini #Futures #NQ_F ⬆️ 77.25 Points (0.73%) to 10,720.5 #futurestrading #future #NASDAQ100 #Investment #investing #invest #investor #investors #stock #stocks #StockMarket https://t.co/mzotIguudf https://t.co/jAJH0jEmGH https://t.co/V3OkdJwJEL	positive
Tenaris $TS Stock Rating Upgraded by Goldman Sachs Group https://t.co/FJKAZWC9bg #stocks	positive
RT @ThePitBoss16: Google Stock Soars Near 10% After Earnings Alphabet Inc Class A NASDAQ: $GOOGL Market Reaction After hours $1,346.00 +1…	positive
DYK that on May 22 2020 $UONE was trading at $1.28 and today it’s opening at $21.50. Who put in $1,000 + on or B4 the 26th? IDK... they should be proud. Unless you’re White and haven’t donated money back to the Black community. Don’t have to. But it would be nice. JS #stocks https://t.co/yVKpZIVN7G	positive
https://t.co/Pj9Gu287hf $MA, $SAM to Intraday_Trend_End.] https://t.co/O6wkep5G2a =	neutral
RT @jadid: Green suites the #StockMarket . The market continues to rebound, erasing earlier losses. $DJI $NDX $SPX $RUT #MarketUpdate https…	positive
$qqq We have detected a noticeable rise in the Zeitgeist for Invesco QQQ Trust at https://t.co/RAhgfFVkoM Visit DataSwarm Markets for more information #STOCKS #NASDAQ DataSwarm ref: 101873	positive
$T dropped under $30 so you know what i did 😏😏	negative
#LEGO #LEGOCity set 60132 - Service Station, 2016 Release #LEGOVehicles #LEGOcars #AFOL #LEGObricks #CollectibleToys #Toys #SP500 #stocks #instafollow #legoresaleprices #LEGOblocks #top10best #top10LEGO https://t.co/EBLT5fdutd	neutral
RT @SheepKnowMore: Fake outrage. $FB is an invaluable Deep State election-interference tool. Tantrums like this by their #FakeNews media al…	negative
$ES_F Needs to trade $90s+ or $2640-$2650 on deck today $SPY $SPX https://t.co/zTkybafvh6	neutral
Told ya so @CNBCFastMoney . Tesla $tsla up another 7.5% today so far today to $1,011. At this rate we’ll be at 2k by the end of June. 😉 #tesla #ev #cnbc #stocks #stockmarket #space #batteries #cybertruck #teslasemi https://t.co/kurTilLYSq	positive
RT @conkers3: @HTVIOLA @wheeliedealer Thank u4 such generous feedback Henry👏 Pete &amp; I are focused on #learning &amp; #improving our #investing…	positive
That’s right. We’re facing the prospect of a long and deep recession, and yet stock prices have surged 45% in a matter of weeks. Just stay calm — and keep taking the shots #Stocks #Investing https://t.co/sKV4idhlVy	positive
DHI Group $DHX Price Target Cut to $4.25 by Analysts at B. Riley https://t.co/iVhKwDicqV #stocks	negative
RT @vincent13031925: Biggest mistakes of the century: From before, Apple $AAPL is only a PC maker Amazon $AMZN is only a bookstore Goo…	negative
Available #onhand #stocks of REGULAR #CYTOKIT text me at 09653052991 #pampalaglag #cytotec #cytoteckit #abortion #mifepristone #misoprostol #abortionpills #abortionphilippines #cytotecphilippines #cytokitphilippines 09653052991 :) https://t.co/7azgTj5r47	neutral
Week 24 (Mon PM Recap) $spx 3023.75 breakout to 3040, 3055, 3070 https://t.co/BpOhEm4Qoc https://t.co/Oz1OY6FuhI	positive
Check which story for #DowJones has the highest score $V $MMM $MCD https://t.co/8zP8MKc2dK https://t.co/uc6PfL9S6o	positive
RT @Lakshmi_888: When I called highs $SPX 33xx,most called 3500+ When most called &lt;1800 at SPX 2175,I called reversal When most called 3000…	positive
@omgwtf2011 @BearingtonTrade $T made their dollar back 🤣🤣🤣🤣 https://t.co/wmKK5XErq0	positive
Why Amazon is thriving when retail sector takes a severe beating from Covid-19... https://t.co/GzEIw6uTWS #retail #Walmart #Amazon $WMT $AMZN $TGT $DG $M #Macy's #Dollar #General #Coronavirus #Covid-19 #Pandemic #shutdown #epidemic https://t.co/8b0fIxe4GC	negative
Nomura Increases Tractor Supply $TSCO Price Target to $95.00 https://t.co/MKWK2oCfnz #stocks	positive
$FANG - Diamondback Energy: Quality Guidance From Management. https://t.co/u70RjddJYE #finance #stocks #business	positive
📺Available now to view on demand: Cycles In The Time of #COVIDー19, with @bcaresearch's strategist, Mathieu Savary. Watch the webinar now 👉 https://t.co/M7ViH92nFC . #bonds #stocks #investors #funds. https://t.co/yZUCaLqWGu	neutral
RT @ZacksResearch: What's the short-term outlook for Disney? $DIS https://t.co/R4lUsdzaeV	neutral
Tenaris SA $TS Expected to Post Quarterly Sales of $1.14 Billion https://t.co/VoQrURiDDx #stocks	neutral
RT @JackChappleSci: China Is Buying Up The World's Ports...And No One Is Talking About It https://t.co/h8vvMo2tLT #china #business #longbe…	positive
RT @FacelessTrader: We can $work from home, oh, oh, oh oh - Fifth Harmony https://t.co/ZPFeSKXUDa I dont care about Goldman Sachs downgrad…	positive
RT @The_Hedge_House: $DLPN Only ONE day removed from the misguided article that was intentionally published by @Benzinga 🤔. Please do not u…	neutral
Remember the turn? Now start preparing for the greatest market crash in history. I say it like I see it. $TSLA $SPY $GILD $ABBV $PFE $TEVA $TDOC $VIX $VXX $UVXY $SVXY $SPX $GOOG $AMZN $FB https://t.co/OhukyvRnIm	negative
Analysts Expect GreenSky Inc $GSKY Will Announce Quarterly Sales of $104.06 Million https://t.co/lI3jhYZz97 #stocks	neutral
#ES_F #CL_F #NQ_F $GOLD #OOTT #OATT $SPY $SPX #Trading #Forex #forexsignals #EURUSD #GBPUSD #OPEC #Volatility $VIX $VXX #Futures #SP500 #6E_F #6B_F https://t.co/09OqZw6DOg	neutral
$AMZN Amazon to Pay $500M Bonuses to Employees Who Worked in June https://t.co/KBf02J6Sk1	positive
@CNBCFastMoney $AAPL-- DUMP DUMP. OVERVALUED AND EXPENSIVE JUNK.	negative
@GoldmanSachs, #es, #sp500, #usdollar, #euro, #aussiedollar, #poundsterling still uncertain on the direction of the dollar. The euro has bounced off the lows. https://t.co/6UTsTHOWiN	negative
Weekly High Frequency Indicators: The Nowcast Retreats Slightly. https://t.co/2jjkUEBSPC #stockmarket #stocks #trading	neutral
RT @ChrisCarreon06: Beautiful box in #ES_F $SPX forming this week. You guys know what comes next!	positive
RT @RedDogT3: $spx intraday look with some levels and thoughts https://t.co/41qBwfESDv	neutral
$BYND is up 20% since our entry from last week. Price blasted through one PLL zone today and stopped at the second. You want so see support at the PLL zone above 150$ from now on. #stocks https://t.co/C0CaebstL5	positive
ABG Sundal Collier - #TF Bank AB TF Bank - Loan loss level down 180bp q-o-q: PBLL in Q2’20 slightly lower than ABGSC and consensus Loan loss level came in at 370bp, down 180bp vs Q1’20 Share to outperform on loan loss relief https://t.co/grKEYWzpv9 #equity #stocks https://t.co/yXYhT8Jf0G	negative
Apple Option Alert: Jul 17 $380 Calls Sweep (6) below Bid!: 450 @ $3.652 vs 3833 OI; Earnings 7/28 After Close [est] Ref= $358.05 $AAPL	negative
Picked $amzn 3300 for earnings around 22. Should work If it runs into earnings!	positive
RT @Northst18363337: Gold and especially silver could be about to experience one hell of a spike. Stay calm if it does and be ready to take…	negative
$SPX Implied Volatility expiration 05/15/2020 #maxpain #options https://t.co/tFrmDjCFsa https://t.co/Nz0K9K6U6b	negative
Only in America do people believe that buying stocks is their national identity and sworn duty to society $SPX $SPY	positive
$GOOG $AAPL $SPY $AMZN $TDOC $TSLA $COST $BA $NFLX $NVDA $TWTR $ZM $BABA $FB $DOW $MSFT $QQQ $BB To enhance your experience in trading and get instant help click here https://t.co/waJXnpA7xo https://t.co/p94fTX4VO5	positive
RT @t0_the_mo0n_: Top stocks to buy this week(in order)- 1- $KTOV huge announcements coming this week 🚀📈 2- $IDEX 3- $BIOC 4- $XSPA 5- $SH…	positive
RT @stebottaioli: $SPX protect yourself https://t.co/5yuv3AEV5f	negative
RT @AlertTrade: #algotrading #algotrade $SPX $SPY $AMZN $AAPL $FB $SHOP $NVDA $GOOGL $PAYX $ASPU $SMPL $WBA $BBBY $LEVI $SGH $MSM $HELE $AZ…	neutral
Dow rises as Wall Street focuses on easing coronavirus lockdowns amid civil unrest https://t.co/SUw6IaN5Kz $SFIX $PFE $CSCO $STX $DKS $ZM	positive
Now do September lol 41pts in 1 minute 😮 #es_f $spx $spy https://t.co/jIBi7qoBqz	neutral
You're not gonna want to miss this! @Benzinga's last Boot Camp was great, and this one could be even better! https://t.co/bqaWKdNXVY #DayTrading #stocks #investing #profits https://t.co/3SqJn6wuiB	positive
Another day, another overnight bid higher. Gotta love low volume overnight rallies off key support levels. $spx $spy https://t.co/DFsBzOtO27	positive
40pts on #nq_f Made it back plus some more 😁 #es_f line is 3180-81 Bias in this area is 3192 Can't short above it #nq_f is 10688 #es_f $spx $spy https://t.co/1AssSMIzlZ	negative
$ES1! RSI Divergence Signal Exchange: PRIMEXBT Symbol: ES1! Timeframe: 1H Signal: Bearish Divergence Date: 06/23/2020, 7:10 PM Trade SP500 Using Crypto Here: https://t.co/gnPhDvSijn https://t.co/F3V9579jDp	negative
RT @kpak82: $AAPL (weekly) https://t.co/vKGRLlIrkD	neutral
Brokerages Expect Canadian National Railway $CNI Will Announce Earnings of $0.91 Per Share https://t.co/qF29Rzh2oP #stocks	positive
#NetWire #RAT Targeting Taxpayers is Spreading via Legacy #Microsoft #Excel 4.0 #Macro $MSFT https://t.co/1yvirAzJf4 #Security #INFOSEC #NETSEC #Cybersecurity #APPSEC	neutral
Proud owner of $AMZN stock. This thing might help me retire next year ...and pay for my yacht	positive
RT @dynamicvol: Feels like the market moved on from the 1st order (virus count) to the 2nd order (oil, solvency) effects this week $SPX $V…	positive
Cerus Co. $CERS to Post FY2020 Earnings of -$0.44 Per Share, Cantor Fitzgerald Forecasts https://t.co/IaND4ABRzj #stocks	negative
$AHH $AHH.PA - Armada Hoffler Properties, Inc. (AHH) CEO Michael O'Hara on Q1 2020 Results - Earnings Call Transcript. https://t.co/hrBkQkE0dY #business #trading #stocks	neutral
$AMZN - Amazon establishes new aerospace cloud unit https://t.co/iU2uOt4XDb	positive
Chinese authorities appear spooked by their own success getting investors crazy about #stocks. State funds cut stakes in big insurer PICC, tech firms, sending signal #China wants to curb the frenzy. https://t.co/QhPSmAHZEj	negative
$FB Sentiment is neutral right now. News mentions: positive (7), negative (27), neutral (38) Sentiment score: +0.111 (scale of -1.5 to +1.5) Stock alerts, news, and research tools at https://t.co/Qkw92RLxV8	neutral
RT @ISABELNET_SA: 🇺🇸 S&amp;P 500 This chart compares the S&amp;P 500 today vs. 1929-30. Have some investors underestimated how far the Fed would g…	negative
@bostonchaahhts If “best qtr since 87” doesn’t make you a little nervous, then by all means keep buying $TSLA $AMZN $NFLX $RDFN $CMG. Otherwise now may be a good time to take a little off here. #justsaying cc: @mchaudhry82 @traderstewie @Terri1618 @johnscharts https://t.co/QT4F4t1Jn5	positive
$SPY $SPX $SPXS $SPXL $SPXU Technical Analysis of the SP500 and where I think it might be headed https://t.co/wzZGqQPX91	neutral
RT @Investingcom: *BREAKING: *FACEBOOK SHARES TUMBLE 8% AMID ADS BOYCOTT $FB https://t.co/2fTlsYo3l2	negative
For Servicing You" " Our Chartered Accountants" #StockAdviosry #Advisory #Stocks #investment https://t.co/AtAUE3OANn	neutral
$JPM $C $FISV $WFC: Stimulus Payments Slow Down Online Banking: https://t.co/8bsaP4P9C2	negative
RT @Stash: It’s been a week. Treat yo’ self. $JNJ #StashStockParty May Fest. Day 6 🧴➡️https://t.co/96ocgRtnHN https://t.co/64jJxDy0qB	positive
$WMT tends to act quite strong during recessions... Something to keep in mind for the ppl pointing to $AMZN as a reason to be bullish on the economy... Despite its worthless industry classification, most don't use it as a 'discretionary'... It's $WMT online...	positive
RT @Reveretrading: July 9 Plan 📌 *Click on Picture to Expand* As always, very grateful for the feedback you guys give me. Best of luck t…	positive
VF $VFC Research Coverage Started at BTIG Research https://t.co/zKoR3WIqU8 #stocks	neutral
Twitter to Share More Data About Users With Advertisers @themotleyfool #stocks $TWTR https://t.co/FP4E8ZZgs0	positive
RT @only1sidehustle: If you are thinking about buying $BRK.B....... Don't do it. @WarrenBuffett loves #dividends but he won't pay you any.…	negative
RT @Madison89421615: Probably nothing to worry about. Just the “invisible enemy”... $spy $spx $qqq $eem $iwm $aapl $fb $googl $nflx $amzn…	negative
$twtr $msft $amzn $qqq $fb $nflx $xspa $googl $mrna $penn $nvda $aapl $spy $spx #Futures $bynd $mark $xspa $tmdi #RobinhoodTraders #SundayThoughts #SundayMotivation #GenZ #Millennials #GenX @DelMonte #holarchy #wholeparts #turtlesupdown Retweet if you are "a part of" humanity. https://t.co/HRt2RfDu6i	neutral
GlaxoSmithKline ... sounds like a snobby law firm. It's #ThatOneAMCall and $GSK picking up $757 million; $PM tacking on another billion dollars, premarket. Tuesday* Big sharks, taking out $2.4 million in call options, $EIX* Dow futures, nice overnight rebound. Eyes: $MSFT https://t.co/F4lOMwY4Fz https://t.co/qqFhvGYp1S	positive
I think my wife qualifies for a job at Fed as she’s been buying tons of crap since Covid-19 stopped the economy $SPX $ES_F $SPY	negative
$BIDU $SAVE $WORK $T $AAPL $C $MSFT $XLF $SPY $FB $CHWY $PTON $DIS $F $ADBE $CSCO $JPM $CCL $MGM $IWM $HD $V $TWTR $XLE $XOM To enhance your experience in trading and get instant help click here https://t.co/o02HlQ7vQI https://t.co/hIMMPsGVB0	positive
💥💥💥💥 FTXP .0005 UP 66% ON FIRE BIG TIME😉 #tradingpennystocks #StocksToTrade #OTCMarkets #SmallCaps #stockpicks #PUMPING #news #StockAlert #Daytrader #microcap #stocks #trading #PENNYSTOCK #Investors #PressRelease #lowfloat	positive
After last week of trading we closed today’s day of trading we closed up $463.35 for a return of 7.37%. Want to know what #stocks are in this M1 Pie!? Check out my video down below for #StocksToTrade in 2020!! M1 Finance Portfolio Challenge: https://t.co/B1h1GmNGQp https://t.co/J9wk9h4Lri	positive
$RCL lost over 16% and is Monday's worst performing $SPX #stock; $NCLH lost over 12% and $HOG lost over 9% while $TDG $CAT $GPS $SIVB $UAL and $LB all closed down over 8% on the day #trading	negative
RT @Rollinopi: $PBT.U $PTGEF so the mighty Merck are Tweeting about Intensity. https://t.co/tsIYjhYrC4 I especially like this bit. Here’s p…	positive
Step Back - Define the Edges - and Wait - https://t.co/uFWuhP96ck #trading #stocks #money #fridaythoughts #trend #trends	neutral
Amazon Workers Urge Bezos to Match His Words on Race With Actions by @KYWeise @nytimes https://t.co/PZMuT3SRR9 more evidence that #Amazon Faces A Crucible Moment With Employees https://t.co/0C1avTwLKq $AMZN	positive
Central Valley Community Bancorp $CVCY Given Average Recommendation of “Hold” by Brokerages https://t.co/WX2DvSo9O6 #stocks	neutral
@gg_veritas Those and $SPX!	neutral
RT @MurdocOTC: $GPFT is a sleeping giant in the marijuana sector guys. .05 pps now could be .50 later this year imo. GREAT DD here just wai…	positive
RT @RTTNews: TSX Ends On Firm Note As Stocks Rebound After Recent Sell-off https://t.co/t3bMgmf8o7 #stocks #trading #rttnews https://t.co/U…	positive
$AAPL company #profile, #Fundamental and #Technical Analysis Score Update (FA Score, TA Score) #stocks #stock #StockMarket #Investment #investing #invest #investor #investors https://t.co/B7BWRcEdMH https://t.co/J1Mx4dHQ5W https://t.co/MObF3kE7iy	neutral
RT @SeekingAlpha: $ATVI - Activision Blizzard, Inc. 2020 Q1 - Results - Earnings Call Presentation. https://t.co/XB1qhvvJBu #finance #busin…	neutral
Definitely $T ....invested in some today 😬 https://t.co/HFBYnKHM27	positive
$XOM breaking out https://t.co/pdCbo8y4pv	negative
RT @SeekingAlpha: $LULU - Lululemon: Running Towards Success. https://t.co/QOqNIuLzQH #stocks #business #stockmarket	positive
Target Locked $CHRW Sold at $83.09 Take Profit: $81.28 Stop Loss: $83.92 Trade with us:https://t.co/injT0PPxiC $TSLA $SPY $AAPL #Forex https://t.co/DVQQxs2QKh	negative
RT @crescatkevin: Smug traders think a big CFTC non-commercial net short is bullish. It was actually its largest ever right before a majo…	positive
@lovepennies1 thanks for following me! Tell your friends about our group the Head Trader Rico used to work on Wall Street for over 20 yrs! Amy Trader/TA #stocks	positive
RT @ValueInvestorRN: So, let me guess, #StockMarket #Futures will stupidly be gapping up (?) on 1) #riots2020, 2) lack of #SocialDistanaci…	negative
RT @ETFtrends: Making Salient Points About ESG Investing Read More &gt; https://t.co/ZygMIFybpr #etf #investing #stocks #business #news	positive
AQR Capital Management, LLC short position in EASYJET PLC down -0.08% to 0.78% #EZJ $EZJ #LSE #StockMarket #Stocks #Shares #Business #Markets #Trading #News #Investing #ShortSqueeze https://t.co/vM411LdLkR	negative
RT @NewsBricks: Nifty Pre-Market Update: ADIA follows Mubadala to pick stakes in Reliance JIO #sensex #stockmarket #sharemarket #stocks #t…	positive
@zerohedge Some point soon this class of “investor” will be selling their $AAPL &amp; $MSFT to funnel more money into their sh!tty penny stocks as they fall back to pennies from dollars. Need the unemployment benefits to cease paying 19-year-olds who live at home to gamble	negative
RT @Merck: Through collaboration with @EisaiUS, we’re exploring new options for patients living with #kidneycancer and those with #livercan…	positive
RT @MattEganCNN: The economy is collapsing like never before and yet US #stocks are on pace for their best month since Oct. 1974. S&amp;P 500 i…	negative
RT @LiviamCapital: 1/ $FB is still remarkably cheap at these prices with long runway of growth. Recent advertising boycott is immaterial ye…	positive
RT @Dublin_Capital: Long $SPX Options holders rushing to the exits this morning, hitting the bid on calls, and trading puts at the ask. Ne…	negative
The rally in internet #stocks suggests the market is believing two contradictory things at once, @johnauthers writes via @bopinion Peter Lynch: “Si te gusta la tienda, probablemente te va a gustar la acción·. https://t.co/UVv7MYQZWB https://t.co/wNOWOFO58E	negative
RT @dariansharris: $ES_F $SPX $SPY 📈 Solid day. Was able to wait out most of the chop with a little patience. Was looking for 3128-3130 fo…	positive
RT @ddubrovskyFX: More idling in US stocks again? Let's check liquidity conditions! Yup, largest weekly shrink in the #Fed b/s this year…	negative
RT @NTMarketscom: #Chinese media tries to cool overheated #stocks. State media in China urges ‘respect’ for the market. Gold breaches $1800…	positive
Baidu $BIDU Has A Weak #Technical Analysis Score (TA Score). Breakdown Of 3 Categories: #candle score Poor; moving average score Good; #momentum score Poor #stocks #stock #StockMarket #Investment #investing https://t.co/Jj64hrH1R3 https://t.co/MQEa3MhtUz https://t.co/XdPiwSJlgF	negative
$TRNE - Trine: Riding With Cable Cowboy's Sidekick. https://t.co/ZO8qpPfLW0 #finance #stocks #investing	positive
$SPX only 40% gain - small still just watching..just crazy..	positive
Looks like $DGLY has been making a steady move, as Bollingers have expanded. More to come? https://t.co/nbcNj9sUNG #stocks https://t.co/e4E8yaJJLZ	positive
#Nifty 9154 Conclusion: Bearish Imp: Cash (in weekly) #StockMarket #Trading #Stocks #TechnicalAnalysis #Equity #Investing #nifty50 #Markets #Trader #SwingTrading #ShareMarket #stockstowatch #StocksToTrade #recession2020 #stockmarketcrash https://t.co/IOqopTlMkC	negative
Financial #stocks, namely those in the #investment, life insurance and annuities realm, are so cheap that many have become takeover targets. Take advantage. https://t.co/wBqu6RyEub	positive
Short sale volume(not short interest) for $AMZN on 2020-06-17 is 48%. https://t.co/YZjq8XgqP8 $WMT 42% $OSTK 48% $MELI 56%	negative
@gamesblazer06 Been loading up on $XLF while everyone was prophesying doom, happy to keep accumulating. Did the same with $JPM below 90 and $GS under 175.	positive
Generac Holdings Inc. $GNRC Receives Consensus Recommendation of “Hold” from Brokerages https://t.co/WaJ1R6wZub #stocks	neutral
RT @warrior16win: $HDii lot more green 🤑 coming on this summer monster 💥🚀 Welcome to the new #banktank members 🦾 🟢🟢🟢🟢🟢🟢 #asia #twitter #tru…	positive
@itsbigD18 @Royal_Bloo @CalebGregory304 Yeah I’m not chasing dividend yield just to say I have it. $T lost a bunch of cable subscribers too.	negative
We're still looking for someone else who can beat our performances! Try free for 7 days https://t.co/7sAfbFrPQS $NSC Signal: ** BUY ** Since: 2020-04-06 Our performance: % 2.94 https://t.co/5xSfm4wM83 #trading #stocks #stockstowatch #stockstotrade $SPX https://t.co/fMUSo4az9H	positive
Political prophet Allan Lichtman: Trump is more ... $AAPL $AMZN $BTC $ETH $FB $GOOG $MSFT $QQQ $SPY $TSLA #cnbc #foxbusiness #business #money #entrepreneur #trading #investing #investment #stock #stockmarket #forex #crypto #cryptocurrency #Bitcoin #Ethereum #Coinbase #Robinhood https://t.co/3qgDvxsdVz	neutral
RT @OrdOracle: McClellan Summation index &gt;+600 is bullish intermediate term sign. Turns down before reaching +600 has been an intermediate…	positive
Booz Allen Hamilton: A Market Leader But Overvalued https://t.co/Ah8KKs9a5l via @dividendpower1 $BAH #dividends #stocks #retirement #invest #personalfinance #defense	positive
Mastercard $MA settled +1.7% to $273.98, and that made for a black candle, as the 200dma remains powerful resistance. I do not believe the financials are being fully priced for loan defaults. @th3gambler https://t.co/iiUx1l0Ov3	negative
RT @DeItaOne: COVID-19 VACCINE FROM PFIZER AND BIONTECH SHOWS POSITIVE RESULTS - STAT $PFE	positive
$KMX #CarMax Inc. ... Used Auto Industry Sales Likely Have Bottomed, but Profitability Has Not: | https://t.co/rtkdfeEO4F #equity #stocks https://t.co/OrmiBr9ghb	neutral
UnitedHealth Group $UNH Price Target Raised to $357.00 https://t.co/2dL5wCoEUd	positive
RT @eWhispers: #earnings season begins https://t.co/lObOE0dgsr $JPM $PEP $NFLX $WFC $DAL $DPZ $C $BAC $UNH $JNJ $FAST $GS $ABT $FRC $TS…	neutral
Don't miss our new video recap! 400% rippers and over 4% on the entire account! #DayTrading #stocks #investing #profits #freedom #motivation #LIVESTREAM https://t.co/BUv2gGwkgi	neutral
RT @androider25: $GCI bounced off support trendline $TELL bounce indicator Buy buy buy #BREAKOUT $spx $spy $qqq $aapl $tsla $fb $nflx…	positive
$AWOX #AwoX SA AWOX (BUY, FV EUR2.0) | No more dilution coming from existing convertible bonds:: AWOX (BUY, FV EUR2.0) | No more dilution coming from existing convertible bonds: https://t.co/BaQs3MaEGQ #equity #stocks https://t.co/2MLccQfTuo	positive
RT @CNBC: JPMorgan reported Q2 results that beat analysts’ expectations. Trading revenue surged 79%. https://t.co/KTEVe7ZX2M $JPM https://t…	positive
Needham &amp; Company LLC Reiterates Buy Rating for Yext $YEXT https://t.co/LXMcXxqPom #stocks	positive
Talk about a last minute win! 3,000% win overnight!!! Go $GILD, let’s close over $85! #stocks #options #gilead https://t.co/GboCMBfVh1	positive
Imagine reading up on $Oil $AAPL $EURUSD concurrently on the same platform! https://t.co/Ut05pyrbV8 https://t.co/Uk8I33EbID	neutral
BOOM 💰💰 Come Join US $fb $aapl $amzn $nflx $googl $bidu $roku $spy $amd $nvda $tsla $ba $baba $shop For Daily Powerful Watchlist, Swing &amp; Day Option Trading Alerts Paypal monthly link in bio, $149.99 DM for biweekly link $84.99 #trading #optionstrader #Money https://t.co/JBhVUeanhi	positive
RT @DanaMattioli: Amazon says it doesn't use information on third-party sellers to inform its private-label business. But interviews with m…	neutral
@michael_venuto @leadlagreport @novogratz @ETFProfessor @DavidDziekanski Can one of you please bring up #gold? Gold continues to outperform crypto in this environment. Investors have spoken. $BTC is second fiddle to $GLD as money supply increases and dollar is set for large drop. Want to benefit from digital payments? Buy $PYPL $SQ $V $MA.	positive
IF YOU WANT A FREE TRADING GROUP TO COLLABERATE AND SHARE IDEAS WITH OTHER TRADERS 24/7 A DAY! JOIN MY WHATSAPP GROUP! https://t.co/CbKMXW9Tmr. #FREE #GROUP TRADING #STOCKS #NEWS	neutral
RT @flyingstocksman: #Regeneron one of those involved in the cure for #coronavirus is in buy on our system. See chart. Key: above the clou…	positive
Huge variation: Nike Inc. Common Stock $NKE 98.4300 down -3.4243% 12:00 https://t.co/Pa7hlovGSJ #stocks	negative
RT @musicnews360: Utah governor declares state of emergency due to ... $AAPL $AMZN $BTC $ETH $FB $GOOG $MSFT $QQQ $SPY $TSLA #cnbc #foxbusi…	negative
$SQ lottos +1,100% $TWLO lottos +50% $TDOC lottos +125% $JPM lottos +90% ✅	neutral
$veon We have detected a noticeable rise in the Zeitgeist for VEON Ltd. Sponsored ADR at https://t.co/pXf1KOyqlw Visit DataSwarm Markets for more information #STOCKS #NASDAQ DataSwarm ref: 102672	positive
$UAVS has $AMZN written all of it. Increasing headcount 1000%. Business must be booming.	positive
RT @MaisaCorp: $DIS Disneyland Paris To Begin Phased Reopening Beginning July 15	positive
#Bajajconsumer looks good range 157 to 150 can test 200 support at 136.#Bse #Nse #nifty #banknifty #hedgefunds #fundmanagers #stocks #equity #trading #Traders #stockstowatch #StockMarketindia #MarketScreener #stockTips #Charts #technicalanalysis #SwingTrading #mutualfunds #etf https://t.co/Q8Gh6QbH4I	positive
RT @GregaHorvatFX: Morning people! stocks are coming slightly down, likely to retreace back to Sunday open. A lot of times sharp Monday r…	negative
��🔛🖥@Microsoft: Microsoft is infesting Windows 10 with annoying ads https://t.co/jLbj5vMmpo $MSFT #Microsoft #Technology #Tech #MSFT #digitaltransformation https://t.co/TtQlml3Mft	negative
#20Kto100KChallenge in 6 months It’s the last week to get into the challenge. Mostly spreads (debit/credit) and swing single legs options. $499 to get in or subs to Full Member access $199/months. https://t.co/rx8lGRGBgh - $SPY $AMZN $NFLX $JPM $JNJ $FB $BTC	positive
A Second Stimulus Bill Has Reached the Senate: Here Are 3 Reasons It Won't Pass @themotleyfool #stocks https://t.co/nduPkq1Fvi	positive
RT @Rosco_NoE: After a lot of hours, research, losses and wins I’ve finally finished my online course on investing in stocks for beginners!…	positive
1-min to Know How to Trade BitOffer Bitcoin Flash Earning! The Quickest Way to Earn Money on the Bitcoin Market! https://t.co/GmS1ZWeBlu #bitcoin #bitoffer #quickearning #Cryptocurrency #binary #options #stocks #finance #betting #gambling #casino #blackjack #slot #lucky	neutral
Apple $AAPL PT Set at $325.00 by UBS Group https://t.co/1tzRQgWzDR	neutral
RT @Sarge986: What to Expect When Marvell Technology Reports Thursday $VEEV $COST $AMZN $WMT $CRM $ZS $NVDA $MRVL https://t.co/Q1C7C7miK3…	neutral
Enterprise Products Partners L.P. $EPD Sees Large Decrease in Short Interest https://t.co/4XTi2xIMIJ #stocks	negative
RT @2kaykim: DAILY VIDEO: "When Is The Next Correction And How Much" 👉 https://t.co/OiH8IQiCgP $SPY $SPX #SP500	neutral
RT @WilfredFrost: $JPM release on #PaycheckProtectionProgram - 300k applications; $36bn of loans, of which $8bn has been funded.	neutral
RT @itsdlevy: Disney wants to open @WaltDisneyWorld as COVID-19 infections in FL soar. They refuse to include testing in the safety plan fo…	negative
Short-term profit margins for European gas-fired electricity generation are set for increased volatility in July. #gas #margins #pricing #stocks #ICIS #profit https://t.co/nPploDx7An	positive
Adobe - Daily #SP500 Short Term: $410 / $440. Medium Term: $390 / $440. Long Term: $380 / $440. Bullish: Short Term: &gt; $412. Medium Term: &gt; $305. Long Term: &gt; $280. Awaiting correction to $410.	positive
Zacks: Analysts Anticipate Sutro Biopharma Inc $STRO to Announce -$0.59 Earnings Per Share https://t.co/sXc14slHRn #stocks	negative
RT @ukarlewitz: $VIX closed on lower Bollinger (bottom panel; vertical lines). When it closes below, brakes shortly get put on $SPX (upper…	negative
RT @SheepKnowMore: The $FB video share of #Covid911 - INSURGENCY that got 5m views and 100k shares was just censored. Even though every fac…	negative
$CRH https://t.co/ZTIcvYqTx7 Pot. intermed bot in Downtrend INTRAWEEK 60m-15m-4m combo chart #Stocks #Trading https://t.co/YcSNMXULku	negative
In all, 149 members of the S&amp;P 500 index $SPX, are expected to report financial results in the week ahead—more than a third of those will arrive Thursday—as well as 12 Dow Jones Industrial Average DJIA, components.	neutral
@RiskReversal just made a compelling argument for selling out of $FB rn! Forget history judging Zuckerberg roughly, the next 6 polarizing months is going to continue to pound the stock, if you believe there will be sustained pressure on the company leading up to the election!	negative
Hudbay Minerals Inc to Post FY2022 Earnings of $1.47 Per Share, Cormark Forecasts $HBM https://t.co/3gWa6yCmCq #stocks	positive
$SPX $SPY $NDX $DIA $QQQ $WYNN ... New... Viva Las Vegas ... https://t.co/8hRUqm8VK1	neutral
RT @baylounging: $FB nice improvement https://t.co/1vOCPqIgnE	positive
short squeeze leaders scan $WKHS, $EDIT, $FOLD, $LX, $CWH, $PING, $ERI, $APT, $NK, $NIO, $SE, $VSLR #stocks #trading https://t.co/Uvbmp8a4nS	negative
RT @SeekingAlpha: $SH - SH: An Effective Way To Short The Market In Your IRA. https://t.co/ZBOhG5xH22 #stocks #economy #business	positive
RT @almostjingo: No comments on $GOOG watch, no #freespeech unless it’s ORANGE MAN BAD. https://t.co/oIaGHzODaM	negative
RT @Breedlove22: #Bitcoin denominated SP500: This is what happens to your favorite stock when pricing it in the most honest and fastest mon…	positive
RT @JesseCohenInv: Happy Wednesday! Here Are My #Top5ThingsToKnowToday In Financial Markets: - $BA $GE $MA Earnings In The Morning - $MSF…	positive
#Options #maxpain chart for $JPM. Free options app https://t.co/wPNDm22czd https://t.co/xxkUdJtpCG	neutral
RT @PhanVeeLeung: So here he comes with the clarification... Good try, Navarro. Guess he and his friends needed a dip in $Spx to buy...	positive
Daddy needs to break even on $DIS. Come on Disney PR team, you know what to do Monday morning! #Hamilton	positive
RT @CointelegraphMT: #Bitcoin price dropped below $9,200 as #stocks pulled back on the #supremecourt decision on #Trump’s tax returns https…	negative
We're still looking for someone else who can beat our performances! Try free for 7 days https://t.co/7sAfbFrPQS $BLK Signal: ** BUY ** Since: 2020-04-06 Our performance: % 4.87 https://t.co/wFFAizyE5U #trading #stocks #stockstowatch #stockstotrade $SPX https://t.co/YAiAmYXJPb	positive
$SNE SONY $300 "Sony’s Gaming business is currently experiencing accelerating growth trends driven by the “stay at home” economy. Sony remains one of the cheapest large cap tech stocks in the world." Third Point Dan Loeb #StayHome #StayAtHome #nikkei $AAPL $NFLX $RKUNY $CMCSA https://t.co/x8i6jRzCEg	positive
RT @TrueCrypto28: #BTC is not a Store of Value, right? 4/26/19 4/26/20 $BTC $5155 $7500 +45% $GOLD $1285 $1727…	neutral
RT @50F7W4R37R4D3R: "A wise person should have money in their head, but not in their heart."- Jonathan Swift #softwareengineer #javascript…	positive
$ITOX .01s getting slapped. Nothing on L2 till 2 cents $SPY $SPX $QQQ $ES_F $NQ_F $RTY_F $ZB_F $GC_F $NDX $RUT $AAPL $NFLX $AMZN $TSLA $FB $MSFT $DIA $NDX $IWM $QCOM $GDX $DAX $BYND $TWTR $GLD $SLV $GE_F $BABA $TLT $LYFT $VXX $TVIX $VIX $XLE $XOM $JPM $GS $GOOG $DIS $IBM #Options https://t.co/ZLFlzyeOtG	neutral
Northwest Natural Holding Co $NWN Given Consensus Recommendation of “Hold” by Brokerages https://t.co/bMJXezUvhB #stocks	positive
S&amp;P 500 E-mini #Futures #ES_F Up 66.75 Points (2.42%) to 2,826 #SP500 $SPX #Financial #market #Capital #stocks #StockMarket https://t.co/mzotIguudf	positive
RT @HedgeMind: IBM Retirement Fund, ~$800M, acquired many hot tech names as of 6/30: Added new positions: $ZM $AYX $TTD $DDOG $MDB $AVLR .…	positive
RT @gzbenso: Netflix leads its rivals in original TV shows by a wide margin in both quantity and quality, according to new data analysis ht…	positive
RT @Tickeron: $AAPL enters an Uptrend as Momentum Indicator exceeded the 0 level on April 29, 2020. View odds for this and other indicators…	positive
#spx 1h some supply &amp; demand review.... ⚖️📈📉#supplydemand #trading #sp500 https://t.co/P40AaIpEfr	neutral
RT @BarrySchwartzBW: Carl Icahn once owned 10% of Netflix. That stake today would have been worth about $24B. He also had 52m shares of App…	neutral
RT @caetuscap: no brilliant insight ... but truly amazing how #COVID19 f*cked the middle class and millions of small business owners yet se…	positive
Short Interest in Lions Gate Entertainment Corp. $LGF.A Declines By 14.3% https://t.co/shmVrLxhZm #stocks	negative
RT @Lakshmi_888: Harmonics #Charts #trading $SPX #SPX #ES_F $ES $ES_F $SPY $DOW #DOW $RTY $RUT #DAX #FTSE $NQ #NQ Broken red equilateral…	neutral
China's annual dog-meat fair opens; activists ... $AAPL $AMZN $BTC $ETH $FB $GOOG $MSFT $QQQ $SPY $TSLA #cnbc #foxbusiness #business #money #entrepreneur #trading #investing #investment #stock #stockmarket #forex #crypto #cryptocurrency #Bitcoin #Ethereum #Coinbase #Robinhood https://t.co/6CkeGZzEEC	negative
https://t.co/ixCJrg6giq Stocks/ETF's Discussed: $XLK, $MSFT, $AAPL, $V, $MA, $INTC, $NVDA, $ADBE, $PYPL, $CSCO, $CRM, $FB, $SBUX, $GOOGL, $AMZN	neutral
@VortCapUnbanned @vincent13031925 Depends on what you mean by "our". If you mean your capital, then no, but for TSLAQ it was a big failure. One of the most prominent Tesla shorter lost half of his fund and his performance is WAYYYY below SP500.	negative
$HEXO target price is $2.21, HEXO has a upside of 327.2% from its current price of $0.52 #stocks #investment #CNBC #trading #NASDAQ #news #daytrade #pennystocks #potstocks $TSLA $TLRY $CGC $FB $SNAP $AMRX $COKE $PEP $BYND $ZM $WMT $COST $AMZN $TGODF $KGKG https://t.co/I7lRxme2iw	positive
hold my balls while i buy some $amzn	positive
RT @WarriorTrading: Cannabis Stocks Stealing Spotlight as Other Sectors Struggle for Attention: https://t.co/WbZGNxebKy | #Daytrading #Stoc…	negative
Insider Selling: Stitch Fix Inc $SFIX Insider Sells 1,333 Shares of Stock https://t.co/T0Emfnja8v #stocks	negative
$VZ $ZM $SPY $DIA https://t.co/MWvubLuMMT Verizon pays under $500 Million for Zoom rival called “BlueJeans”... Will be interesting what $VZ decides to do with it. Trouble on the way for $ZM	positive
RT @BrandonVanZee: 04/28/20 - View today's #MarketOutlook from @Market_Scholars https://t.co/YBGN15ftrD Mentioned: $SPY $IWM $DIA $QQQ $S…	neutral
$CRI #Chargeurs S.A. Chargeurs : Q1 naturally hit by Covid-19, FY targets confirmed thanks to Lainière Santé: &gt;Q1 sales at € 157.5m, down 2.3% (-4.7% LFL) - Chargeurs reported this morning Q1 2020 sales of € 157.5m, a shade below our… https://t.co/6Qwh7bhwYg #equity #stocks	neutral
Everything doing great!! #SP500 Great Again!!!	positive
On June 30th the Macrohedged | Market Microstructure module is released into the course. Unlock the knowledge on how the market is glued together. You need to own the course to access this module: https://t.co/EVLGM1qYXK #ES_F #CL_F #NQ_F $GOLD #OOTT #OATT $SPY $SPX #Trading https://t.co/6oLvvdFpDD	neutral
$ITOX WHY DO INSIDERS OWN 17.7% of the shares?💸📈 $ACB $APHA $CRON $TRTC $CANN $GWPH $MCIG $MJNA $AMMJ $GRNH $CARA $CANA $CGRW $CBDS $CLSH $CODI $CVSI $DIGP $MDCL $MNTR $MJNE $MYDX $NMUS $NTRR $NHLE $NDEV $OXIS $PRRE $RMHB $SPRWF $SRNA $TLRY $CAT $TSLA $GS $MGM $JNJ $PFE $MRK https://t.co/kc8P0idKq1	neutral
Great chart by @BTstocktrading !! $AMZN https://t.co/n1ZJQERYa7	positive
Also note -- $ES LOD = 3001.75. So far Bears are unable to press below $ES 3000 Round Level. $ES $ES_F $SPX $SPY $NQ $NQ_F $NDX $QQQ $RTY $RTY_F $RUT $IWM $YM $YM_F $DIA https://t.co/ndzQblmraX	negative
RT @drweeklyoptions: UPDATED #20Kto100KChallenge May 28th - update of this #20kto100kChallenge ! Some open position will update when I clo…	neutral
Investment Analysts’ Upgrades for May, 8th $AEHR, AFLYY, BCOR, CHEF, CNP, CPK, CPTA, CSV, CUE, DISH https://t.co/zvwESItE0X #stocks	neutral
RT @RichLightShed: We now forecast @disneyplus will reach 90 million subscribers by the end of fiscal (Sept) 2021 and could break 100 milli…	positive
Anthem Inc $ANTM Sees Large Drop in Short Interest https://t.co/Mygtp433Yu #stocks	negative
There are a number of factors an #investor must consider when deciding on whether to purchase real estate or #stocks. 💡 Is there anything else you would add to this list? https://t.co/omJptFmPTs	neutral
Banks may face a tsunami of problems as three factors collide: rise in non-performing loans, deflationary pressures from a prolonged crisis and central bank keeping negative rates that destroy banking profitability. https://t.co/shZWdA7anO #ECB #banking #economy #stocks #bonds	negative
River &amp; Mercantile Asset Management Has $13.01 Million Stock Position in Johnson &amp; Johnson $JNJ https://t.co/kS94rBNj0C	positive
NextEra Energy's Utilities Fall Short in Energy Efficiency @themotleyfool #stocks $NEE $DUK https://t.co/tQ79w62yLC	negative
RT @SJosephBurns: Big tech returns in 2008 recession... $MSFT: -44% $AAPL: -57% $GOOGL: -56% $AMZN: -45% $QQQ: -42% Big tech returns YTD i…	negative
@andydicesorkin Yes, especially for companies with extensive interests in China. Not meant to be a political statement, nor an endorsement of any particular policy, but I put the chance of the White House "punishing" China in some fashion within the next 30 days at 100%. $WYNN $AAPL $BA	positive
RT @Scutty: Gold and $SPX have been increasingly moving in the same direction, similar to the GFC. Deutsche Bank believes a "window for gol…	positive
Kansas City Southern $KSU Given Consensus Recommendation of “Hold” by Brokerages https://t.co/eRZaPC4phY #stocks	neutral
$FB 30 minute Had a test of wedge resistance, faded a bit from that resistance area. https://t.co/tfRjAXxLPF	neutral
Keep adding companies with strong balance sheets and sustainable dividends to your portfolio. Increasing cash deployment target to 65% with this oil related dip. Looking at $IBM $ITW $LEG $JNJ today.	positive
$USFD #US Foods Holding US Foods Holding Corp.: | https://t.co/WLG4UxGB5Q #equity #stocks	neutral
RT @NorthmanTrader: You'd think instead of relentlessly upgrading the stock maybe Wall Street analysts would tell people to take some off t…	neutral
$AAPL - Apple's chip will outperform Intel's Macs - analyst https://t.co/JJB5jTpGyf #BUYAAPL	positive
RT @HarmonicCharts: #Harmonics #Charts #trading $SPX #SPX #ES_F $ES $ES_F $SPY $DOW #DOW $QQQ $DIA $YM $RTY $RUT #DAX #FTSE $NQ #NQ Purple…	neutral
RT @A4Horg: "Shame on #health insurers for attempting to cut reimbursement rates for this crisis’s first responders while raking in massive…	negative
The #StockMarket bounced last week as the #economy kept improving. But will it last as #coronavirus cases increase? Here are the key things to watch this week. $AAPL $NKE #FederalReserve https://t.co/TDLSGOFoiQ	positive
$JPM: New SEC Filing for $JPM: Form 424B2 (No. 0001615774-20-007118): https://t.co/86j2Yp8Hxs	neutral
CFRA Research - L Brands, Inc.: | https://t.co/Rb88kBPhNb #equity #stocks https://t.co/y4mBgzapnS	neutral
@bgrahamdisciple I’m sure $amzn stopped paying rent when ever things got tight.	negative
RT @KimbleCharting: Mining stocks attempting to do something they've failed at for 9-years, a major breakout! Will it be different this tim…	negative
@WSJ All about the money, eh $DIS. Got to stop that 20% yearly decline somehow.	negative
@vincent13031925 also 2013, but I sold. Also sold 6000 shares of $AMZN @ $4.50 in 1998. Like Ron Barron, I'm not making the same mistake with $TSLA this time.	negative
This is not a favorable time to trade big. Why? - Headline risk - Opex / Powell / Covid / lock-down extension - Trading range huge - ATR at 51c - Breakdown between fundamentals &amp; prices - CTA re-leveraging $SPX, gamma - Low liquidity - Lock-down extension=economic collapse	negative
RT @FibroidNetwork: @MeshAwarenessAU @fibroidsupport @MeshCampaign @EmmaHardyMP @HumanHeadline @SharonHodgsonMP @carlheneghan @JackieDP @RC…	neutral
2000 PIPS Profit in April 🔥🔥 For free signals, Join https://t.co/eVAprHWHoh #gbpjpy #fx #aapl #eurcad #euraud #audnzd #bitcoin #crudeoil #forexsignals #eurgbp #audjpy #stocks #forex #BTC #usoil 79726 https://t.co/NfyxBD33yS	positive
RT @Dennis_Trades: Did @Nasdaq really just try to hide the 4th industrial revolution by calling it “Future forward infrastructure”??? Can’t…	negative
You can take profits on $AAPL and $CVS	positive
RT @TommyTheBull287: $AAPL I am in $350 call swing a lot of resistance picking back up on $350 trend will see https://t.co/I1DODV7xRx	neutral
Many #investors #LOOSE #MONEY #Trading with @robinhoodapp due to their #platform #problems! #robinhood #robinhoodapp #robinhoodoutage $amzn $msft $fb $ba https://t.co/sL5zc5YOWn	negative
$FB Delta expiration 05/01/2020 #maxpain #options https://t.co/bDhWihGdXA https://t.co/kdT3d7LjyS	neutral
RT @RodBoydILM: $FB is becoming indistinguishable from Fox News. Or is it the other way around?	neutral
RT @anuragchawla32: Did you know which stocks comes under Bank Nifty? Here is the breakup of Bank Nifty for better understanding which sto…	positive
Morning Market Report #Nifty #nifty50 #sensex #stocks #stockstowatch #Stock #share #sharemarket https://t.co/seCz2W3FuV	neutral
$aapl added fee more here. Average is 1.47 now.	positive
@Tesla stock going up.. I so regret selling my shares at $900 #investing #stocks	negative
RT @JLyonsFundMgmt: Chart Of The Day: ISE Equity Call/Put Ratio hits highest level in 8 years (...red flag or 1-day outlier?) $SPY $SPX htt…	negative
RT @thedevman1: Did you hear about #Facebook? Zuck lost a little money...7 BILLION I think.🤷‍♂️ Seems some advertisers pulled their Ads Cu…	negative
A Boomer's Plea: https://t.co/HVe2unB8ig Sector expert Michael Ballanger voices frustration with his own generation, which has "turned a blind eye" to the radical, fiscal and moral principles that shaped it. #economy #stocks #investing @MiningJunkie https://t.co/GwNcM1ZxFN	negative
RT @bsindia: Shares of metal companies were under pressure with Nifty Metal index falling 6% on the NSE on concerns of weak demand #market…	negative
RT @StocksNJocks: We welcome Fari Hamzei of @HamzeiAnalytics back to the show next. Stream us LIVE on https://t.co/6IvBdicpPw. #stocks #mar…	neutral
🔔The Morning Ring🔔 “ I accepted everything for what it was-not what I wanted it to be.” - Nicolas Darvas #tradingmindset #stocks #canslim #StockMarket https://t.co/wMrps4MBhD	neutral
RT @fawkesmask: @federalreserve Thank god the SP500 is going to ATH. Good job guys.	positive
RT @leadlagreport: Several large corporations are stopping advertising on Facebook either till July or for the whole of this year. If these…	negative
RT @randywhorton: Coming Up: #DayTrading Talks &amp; Tips with a special guest. (Sonja) #Live June 8 2020 at 8:PM Riyadh Time (1:PM EST). #Stoc…	neutral
Amazon isn’t the only e-commerce company thriving. $AMZN shares have climbed &gt;30% this year. But some online retailers are faring even better. Shares of Wayfair, the online furniture and home goods seller, have doubled in price in 2020. /via @qz https://t.co/GQOmMzgcF9	positive
@SullyCNBC ICYMI we replaced $FAANG w/ $WACT - $WMT $AMZN $COST $TGT #deathofretail cc: @RiskReversal @GuyAdami @JeffMacke https://t.co/clNllypHuT	neutral
RT @Sarge986: Sizzling Nasdaq, Covid Crossroads, Coins Collect Dust, Thoughts on BP $KR $KFY $JBHT $LSTR $UPS $FDX $AMZN $MA $DIS $AAPL $FB…	neutral
RT @SorabNY: Today’s profit $656 $spy $spx $tsla $amzn #Daytrading #News #Invest #investing #Finance #Money #Life #NewYork #wallstreet #S…	positive
Avanos Medical Inc $AVNS Receives Average Recommendation of “Hold” from Brokerages https://t.co/iyVuFxoiQx #stocks	neutral
$spy $spx $ES_F if markets base on weekly charts thursday, yall are in for a treat next week	positive
$SPX could very well erase all of its 2020 losses after being down more than 30% year to date https://t.co/2MWKqKD1Go	negative
RT @realwillmeade: Netflix $NFLX now has a bigger market cap than Disney $DIS but if 29 states open up on May1st and sports are back on ($D…	positive
Disney misses quarterly profit estimates, offering the first assessment of the damage the pandemic has wreaked on the entertainment giant's business https://t.co/7QsqF5qWQp $DIS	negative
Mueller Water Products, Inc. $MWA Short Interest Update https://t.co/H4pt4tNfFl #stocks	positive
RT @RichLightShed: Just spoke to union leaders representing Walt Disney World cast members in Orlando - Confirmed that Disney is NOT testin…	neutral
$twtr $msft $amzn $qqq $fb $nflx $xspa $googl $mrna $penn $nvda $aapl $spy $spx #Futures $bynd $mark $xspa #ThursdayThoughts #thursdayvibes #Thursday @goldsworthy_art https://t.co/sd3FznTOem	neutral
Bias Game #48 Fellow traders, here we are with another Bias Game quiz! Let's see what you think of this one 😉 Vote in our latest tweet! If you like this content, help us share!! 👍 #Wyckoff #trading #wyckoffmethod #stocks #stockmarket #learntotrade #tradelikeapro #cryptotrading https://t.co/mHVUpXmDmo	neutral
REPORT: Facebook fails to win over ad boycott organizers $FB https://t.co/csoywrk0MP	negative
RT @gholland04: 💥💥💥 Obama administration repeatedly sought to cut PPE stockpile ... ... and with $T deficits the Dems are trying to Blame…	negative
RT @JesseCohenInv: 💥Notable #Earnings To Watch This Week (via @eWhispers)💥 Mon: $PEP Tues: $JPM $C $WFC $DAL $FAST Wed: $GS $PNC $BK $UNH…	neutral
With past performance like this, how can you not sign up for a Free 10-day trial to https://t.co/dciVAHNRLf? Winning Option Swing Trades Since 2006 $AMZN $GOOGL $NFLX $FB $AAPL	positive
$PJP #X5 Retail Group N.V. GDR X5 Earnings Preview 1Q 20 - Profitability under pressure as gross margin normalises: Revenue expected to grow by 15.7% yoy: We expect revenue to amount to RUB 469.4 bn, growing by 15.7%. Net retail sales… https://t.co/1QKnB9pTSk #equity #stocks	positive
$FB reports FQ1 earnings of $1.71 EPS and $17.74B Revs - https://t.co/g6Ov8jwf4X	neutral
Mix Pre market action! Top traded large caps in pre market! $BA-1.57% $NCLH-9.35% $SPY+0.5% $CCL-4.55% $AAPL+0.96% $AAL-0.29% $TSLA+0.39% $UAL-1.69% $NKLA+4.8% $QQQ+0.70% $TQQQ+2.2% $RCL-4.85% $DAL-0.89% $NIO+2.3% $BYND+3.3% $MSFT+0.7% $DKNG-4.3% $IWM+0.85% $AMZN+0.9% $AMD+0.79% https://t.co/qgjzbWJJM8	positive
Target Locked $KO This looks bad, sell at $49.00 Take Profit: $47.71 Stop Loss: $49.49 Trade with us:https://t.co/injT0PPxiC $TSLA $SPY $AAPL #Forex https://t.co/Honl7d4u7m	negative
RT @RisingSunCap: Isn’t $DIS a short on lackluster #reopening follow thru like the casinos in early-to-mid June? Cc: @RichLightShed https:…	neutral
@petenajarian $msft 182.50 16k weeklys bought today ...	positive
RT @passthepuck: NO ONE IS TALKING ABOUT THIS...WHY? Respiratory acidosis develops when air inhaled into and exhaled from the lungs does n…	negative
#LUPIN , Buy LUPIN Now @ 938.8 Looking good for 1000, 1100, 1240 , 1370++++ in near term.. Support , between 850-890 #nifty #banknifty #equity #stocks #b7232506 #trading #sp https://t.co/pdah5NXMyt	positive
Ascendis Pharma A/S $ASND Given New $219.00 Price Target at Oppenheimer https://t.co/DNYoPfBPv6 #stocks	neutral
$NVDA $INTC both downgraded today, fwiw.	negative
RT @MoHossain: “The forward 12-month P/E ratio for $SPX of 21.8 is well above the 5-year average (16.9) and the 10-year average (15.2)” @Fa…	positive
RT @icewood_blade: Historically, amongst OTC #stocks reverse merger plays have the most insane ROI percentages. We have one on the brink of…	negative
@SaharasCharts Nice call on $Spx yesterday	positive
Are you ready for your 10-Day free trial, No credit Card required. Begin growing your portfolio with OptionAlarm Option Swing Trades today! https://t.co/7I5Am7xkYr $AAPL$NVDA $MSFT	neutral
Earnings Season For Nordic Banks Is Upon Us. https://t.co/j7ewU8hGZn #stocks #stockmarket #economy	neutral
SP500 Daily Chart https://t.co/tcQACjY2UL 🙋 Bet with $BTC via ⟶ https://t.co/IZRIXuhFIf √ https://t.co/tWlz9JjcGY	neutral
@HillaryClinton @JoeBiden 3 perverts. #metoo FOUNDATION -- all tax-free $DJIA $SPX $NDX $IWM $AMZN $GOOGL $GS $FB $TWTR https://t.co/IwndRrSqLL	negative
RT @AlmondConfirmed: I wonder why neither Apple nor Fitbit have been able to release a similar functionality to help with virus detection.…	negative
#technicalanalysis #elliottwave #priceaction #swingtrader #swingtrading #motivation #luxurylifestyle #stockmarket #millionaire #cash #FXsignals #successful #stocks #trading #investment #knowledge #forex #makemoney #motivated #wallstreet # scalping #financial #financialfreedom https://t.co/k8IdWeCJg5	positive
$AAPL watch 328+	neutral
I am looking to #invest in #stocks and I want to invest in a #blackowned #tech or #sustainablefashion company. If you have any recommendations, please let me know 🙏🏾💕	positive
RT @frontierx5: $SPX $SPY if the president of the u.s.a says expect a V recovery maybe you should take the hint..	neutral
RT @ReformedBroker: Amazon is less than 2% away from a record high. $AMZN is 10% or so of the QQQ's https://t.co/ejWq3o2AuA	positive
#USDJPY hit 1st Target!🔥🔥 25 pips profit!✅🔥🔥 I know you will miss out : https://t.co/dOfAlEtA43 #stocks #XAGUSD #forextrading $ETH $BTC #EURCHF #CRYPTO #XAUSUD #fx #FB $BTC #Forex #forexsignal #EURUSD #AAPL 513737083 https://t.co/4o1nOpP9PF	neutral
$spy $gspc $aapl $nflx $goog $tsla Financial stocks reverse course, as J.P. Morgan and Wells Fargo shares swing to losses https://t.co/6NRdAue7ZU	negative
RT @Terri1618: $SPY update. Consolidating the big move up. Reaction2 eps will be key. Patience4 high probability setups T: $PINS $ZM locku…	positive
Pilots in Pakistan air crash distracted by ... $AAPL $AMZN $BTC $ETH $FB $GOOG $MSFT $QQQ $SPY $TSLA #cnbc #foxbusiness #business #money #entrepreneur #trading #investing #investment #stock #stockmarket #forex #crypto #cryptocurrency #Bitcoin #Ethereum #Coinbase #Robinhood https://t.co/8f5TNzCEOd	negative
7 Investing Principals #Investing #StockMarket #Retirement #Stocks #Bonds Download our free guide https://t.co/yWXwHQvLLK https://t.co/NHLyu8NgBr	neutral
Looks like growth stocks are taking it on the chin today. Possible profit taking and rotation into value names. Some consolidation was due. $SPX	positive
RT @dreambigly: $aapl up overnight as usual lately needs to get over 400 fast of take the market down, 3230 SP resistance everyone needs a…	negative
$SPX $SPY $QQQ @federalreserve @realDonaldTrump bring the market down! https://t.co/Tuh7ft0s4U	negative
Watching Mark Zuckerberg interview Dr. Fauci on Facebook Live $FB #COVID19 https://t.co/QuOzCOfasb https://t.co/DQEfxFaIIX	neutral
Crazy opening gaps... $SPY $SPX 😘	negative
RT @FactSet: The forward 12-month P/E ratio for $SPX of 21.8 is well above the 5-year average (16.9) and the 10-year average (15.2). https:…	positive
RT @CCM_Ryan: I’m intrigued by the concept of thematic investing. Building a portfolio around central themes/trends - CTV $ROKU $TTD - War…	neutral
RT @DKellerCMT: Can't be too negative on stocks until I see cumulative advance-declines breaking support then making a lower low. Teasing…	negative
$FB puts gonna slap today	positive
RT @mardermarket: “Don’t be a hero. Don’t have an ego. Always question yourself and your ability. Don’t ever feel that you are very good. T…	negative
Buy rating ✅✅ $insg Inseego #stockstowatch #stocks #technology https://t.co/Y00iC3nG3Q	positive
RT @syinvesting: @PeterKolchinsky @UniofOxford @VasNarasimhan @BioCentury #COVID19 An updated vaccine pipeline from @TheLancet: https://t.c…	neutral
RT @SoccerMomTrades: This is how I see $ES right now...bearish bias under $3232 . The closer you open your short to that zone, the better y…	negative
Brokers Issue Forecasts for Centennial Resource Development Inc’s Q1 2020 Earnings $CDEV https://t.co/xZREqdbLed #stocks	neutral
RT @ScalpMaster1: Long Watches: $AMZN, $TSLA, $IMRN, $AAPL, $BABA! Short Watches: $PM!	neutral
Aerpio Pharmaceuticals ($ARPO) social hype OVER HYPED. Chance of financial distress is under 1%. https://t.co/nNgCqhbNWo #biotech #stocks #fintech	negative
RT @unusualOA: Date : 07/09/2020 Time : 10:33 AM Ticker : $ATH Exp : 08/21/20 Strike :35 Spot : 29.97 Contracts : 1000 @ 1.84 Premium : $…	neutral
RT @CryptonewsGames: Ray Dalio, the billionaire hedge fund manager and founder and chief investment officer of Bridgewater Associates, beli…	neutral
$es $es_f 4hr chart. Nice consolidation going on, I wouldn't be surprised to see this upward trend break, then get the next leg push higher. Something I am actually looking for. GL $spy $spx I am holding a partial position in 360c $nvda $nvda $amzn $ba $aapl $googl $nflx $roku https://t.co/u97Mx4iqCp	positive
"The first rule of business; treat others like they want to treat you."- Charles Dickens #softwareengineer #javascript #python #C++ #golang #nodejs #reactjs #stockopertor #highgrowthstocks $SPX $QQQ $RUT $VIX #canslim	positive
Unless you are an arrogant letter writer/advice seller (not all are but some are) it is time to realize that the obvious problems in this economy and the financial mkts provide an uncertain road w/ both risk and opportunity, even if u are a pious shark. $SPX $NDX $IWM	negative
Stocks open higher as unemployment claims continue to rise, but at slower pace. -Dow industrials up 71 points, or 0.3% -S&amp;P 500 rises 0.4% to 2,810.46 -Nasdaq Composite up 0.3% at 8,521.15 #DOW #US30 #SPX500 #NASDAQ #MarketWatch	negative
RT @MinteractApp: #Options Flow Stream Update $AAPL $AMZN $TSLA $MSFT $BABA $SQ $SPY $NDX $QQQ $SPX #OptionsTrading #OptionsFlow #optionstr…	neutral
Microsoft Inks 5-Year Deal with Coca Cola @themotleyfool #stocks $MSFT $KO https://t.co/zgkeIEZreb	positive
$SPX $ES_F $DJ_F $DJIA Dow futures up 300 points on easing of coronavirus lockdowns as earnings season hits stride U.S. stock-index futures rose Tuesday, with analysts citing progress toward easing coronavirus lockdowns a... https://t.co/IAjHbwzFw5 https://t.co/lF65oUZTfo	positive
RT @tq_equities: $AAPL closes within previous day's range after lackluster session: https://t.co/7SICEsT52n Sentiment: Neutral #AAPL #Apple	negative
RT @NorthmanTrader: If $AMZN employs all of us we can deliver our own packages to our houses.	neutral
RT @hedgopia: #HedgeFunds reduce net shorts in $SPX futures but remain massively net short. Holdings are as of Tue, so may have changed in…	negative
RT @KobeissiLetter: S&amp;P 500: Counter-trend rally #2 stalls as 2820 supply imbalance drove $SPX below 2750. We are now watching the 2710 ke…	negative
RT @AndrewThrasher: [New Post] Why Volatility Suggests Further Equity Weakness May be In Store $VIX $SPX https://t.co/phvswBTBHu	negative
@ThinkTankCharts Excuse me, one question, do you define liquidity sp500 divided by ....??? thanks in advance	neutral
$RIGL Shredding Scans This Morning 🔥 Our Entry Target Was The Break Of $3.60 Here 🎯 Expecting Decent Upside But No One Predicted $5.24 😤🤯🔥 Hope Everyone’s Having A Successful Trading Day Out There 🙏 $EBON $IMV $PRCP $INMB $EQ $ICON $ALT #stocks #pennystocks #stockalerts https://t.co/pyeAsIBoo0	positive
RT @mercadomagico: Monopolies are always bad for the consumer Keep your yes open 👀 $NMGC NeoMagic's https://t.co/gzPGOV7s8h @mercadomagico…	negative
@DougKass @realmoney I piled a lot of $C and $BAC as mid-term investments as I share your view on them.	neutral
RT @305trdr: Nice call on $AAPL this morning by @trickmitch1 them levels are fire!!!!	positive
@LizAnnSonders @LizzAnnSonders 07/15/2020 History in the making If Elon, Jeff, Bill etc can be hacked what about their fairytale price earnings ratios? Let slone the growth ratios #faangm #faangm #bubble $tsla $msft $amzn	neutral
#SelfieCompassion: Bill Clinton "I feel your pain" from Rich White #NeverTrump 1% Elitists @DNC. Ditto Parasites like $23 billion Leona Laurene Jobs at $AAPL $AMZN $FB $VZ $BA $MSFT $GE $GOOGL $IBM Bob Iger $DIS $ACN $CTSH $TCS $WIT $HCL $T $VZ $CERN #Cerner Deloitte Consulting https://t.co/J68D9Ynats	positive
Short Interest in Chromadex Corp $CDXC Drops By 7.7% https://t.co/Ix7Tle79TR #stocks	negative
$GOOG #patent 20200177664 SYSTEMS AND METHODS FOR ACCESSING MULTIPLE RESOURCES VIA ONE IDENTIFIER #tech #IP #research https://t.co/QGn9UTcRuQ	neutral
RT @RealMikeLarson: This Tweet from @carlquintanilla illustrates how $SPX, e.g., not really sensitive to energy. But IMO that's a "technica…	positive
$Ions @BPMonia: Oral is what will separate us from competition in #rna therapy. Unlike #rnai, single stranded #oligos (antisense) can also target the nucleus. $alny $arwr $drna $akca $wve $srpt $biib $azn $pfe $nvs https://t.co/GV2RUtau6U	neutral
RT @FXCM_MarketData: #SPX500 SSI is at -2.88 Risk Warning: Losses can exceed deposits. Disclaimer: Past performance is not indicative of f…	negative
Recent Research Analysts’ Ratings Changes for Apple $AAPL https://t.co/QejOwiVRF8	neutral
I have not seen many people/funds bearish $spx it is the majority that think it’s going to ATH but it’s ok because of Fed. $spy $qqq $iwm	negative
RT @NorthmanTrader: And yet $SPX is trading higher than it did at the end of May 2019. #efficientmarkettheory https://t.co/KGgCd83FkJ	positive
RT @theGreenBeta: DAILY GREEN BETA: Gujarat Containers Ltd(0.3) - India - Consumer Cyclical. #investing #finance #fintech #advisors #fintech #stocks	positive
RT @DrewSpavy: The space industry is growing rapidly. Here's a few stocks for thought... #space #investing #stocks #StockMarket #FutureTec…	positive
RT @50F7W4R37R4D3R: "Act the way you want to be and soon you'll be the way you act."- Les Brown #softwareengineer #javascript #python #C++…	positive
Goldman Sachs Commodity index decides to roll entire WTI position in 1 day! USO ETF changed the rules so GSCI doesn't want to be last one to roll. More pressure on oil means more pressure on equities! #stocks #StockMarket #trading #investing #WallStreet #bolsa https://t.co/pSzwV59U9O	negative
RT @ThePivotKing: $SPX 2885 and grrrrrrrrrrrrrrrrrrrr TO THE TICK!!!!	neutral
RT @financeasmr: Facebook $FB has so many issues from regulators and clients Rizzle doesn’t If you are a venture capital invester consid…	negative
RT @m0322701: Market caps: $AMZN - 1380B USD $GOOGL - 997.06B USD $LINK - 1.68B USD Early is an understatement.	neutral
ASML $ASML Scheduled to Post Earnings on Wednesday https://t.co/turxHsJwst #stocks	neutral
Why don’t the Fed help out with the food banks and help the poor unemployed? #MondayMorning #PrideMonth $study $spx @bopinion https://t.co/zDWjmYq2Go	negative
RT @elerianm: The @WSJ on what's driving the shorting of #stocks that has seen "bets against the SPDR S&amp;P 500 Trust, the biggest exchange-…	positive
#SAP $SAP Q1 EPS €0.85 Misses €0.94 Estimate, Revenues €6.52B Miss €6.53B Estimate. Shares 🔻3.54% to $118.22 #earnings #earningsreports #EarningsSeason #stocks #StockMarket #stockstowatch #StocksToTrade #stock #StockTrading #investing #finance https://t.co/YcCtCSZzuD	neutral
is a dem sweep is going to be a problem for names like $V and $MA? 🤔 // Credit Cards Take From Poor, Give to the Rich https://t.co/TMhKpnTT3h	negative
RT @MitradeOfficial: #Oil slipped on Friday but overall remained on track for a weekly gain. Noon prices: #SPX500–3135.5 #NAS100–10366.8 #…	positive
Weekly State of Markets and Trading Ideas Report- Crash ahead? https://t.co/0NzSuCPD0C $ES_F $spx $spy $dia $labu $xbi $gld https://t.co/tkxu8DNOi9	negative
In $snap 7/17 $26 calls at .91. Looking for 25% cut at .7. Only in this and $jnj short term rn	negative
@Purepriceaction +19 points from 3096✅ Target was 3075🎯 3077 hit We r just killing it again 🔥 called 3116 sunday night as potentially top as 3116 was my last bull target For now top at 3111..🧐 Next targets level 3045 $ES_F $NDX $SPX $SPY	positive
$VNRX said Tuesday it saw signs of success in an early study of whether its Covid-19 immunoassay could help predict disease severity in infected patients. The study showed "strong prognostic potential" for the technology #daytading #stocks	positive
RT @ecoinometrics: #Bitcoin Performance in 2020 Jun. 09, 2020 Year to date BTC +41% 🔥 GOLD +12.5% SP500 -1.65% https://t.co/wL8QrPy2kQ	neutral
Bay Street Seen Opening On Cautious Note https://t.co/ufCIGW2Gfv #stocks #trading #rttnews https://t.co/sVrI6Z2m1J	negative
Will today be 5 days in a row that our 8:45amET analytics is within $0.04 of HOD? StayTuned #CL_F #CL $CL_F $CL #OIL #Futures $BDO $ES $APC #CRUDE $UCO $SPX $RIG #fintwit #Energy $SPY $ES_F #ES_F #ES $NQ_F $NQ $XLE #OPEC #CrudeOil $USO #WTI #DayTrading https://t.co/7CXK7vJSIM	neutral
The web/tech leader companies from the last 5 years leading in the shutdown $AMZN $NFLX is not all that surprising and I'd like to see more broad based strength (25% in 13 days is good I'm not dumb) to recover with. Let's see if they STFR in $SPX into close	positive
RT @SaitoChung: Thank you for sharing John! The title of this book holds a key word, “Still” and that means Wall Street doesn’t care when y…	neutral
Telenav Inc $TNAV Short Interest Update https://t.co/DKzS9AcmRt #stocks	negative
RT @TicTocTick: 5/6 plan: 1. Look for shorts if open below 2865, targets 2796 2. Look for 2903 if open above 2865 13 hours to open and n…	neutral
RT @firemanwill28: $SPY $SPX $QQQ clearly has moved on from the virus. Much worse numbers coming out with death rates higher. That's all th…	negative
There are no free lunches Oil $50 #HOLD $2,000 in weeks #bullish $UCO $JNUG $NUGT taking off soon exponential upside #Coronavirus the moment for #helicoptermoney https://t.co/OvtQRE3qXf $JNUG $NUGT $UCO $ERX $OIL $EWJ $EWG $EWL $EWP $EWN $GDX $MS $SAN $JPM $GDXJ #HelicopterMoney	negative
$SPX They ran stops on the H and S pattern into close. Never set stops EVER on a key technical as 'crims' will run them and take you out ahead of big move to come. Hope you where not taken out! West https://t.co/BfWckigSrL	negative
So, right about now, I'm super glad that I never got that job offer to work at Exxon a few years ago... even tho they made me pay for my own plane ticket and hotel... LOL $xom https://t.co/pwu2iOosK4	positive
📌 Subscriber Access The #stockmarket valuation, the short- &amp; long-term forecasts, and the equity risk premium have been updated on 👉 https://t.co/ZrpyqM1YJ4 #valuations #valuation #markets #investing #sp500 #nasdaq #dow #dowjones $djia $spx #spx $spy #stocks #assetallocation https://t.co/Dkx2pHSEjZ	neutral
$AMZN 2266 is today target.	neutral
On watch tomorrow // Pt. 1 🔥📈📚 $ICD $BIOC $PSTI $NLS $CEI #Bullish #Stock #Stockmarket #Trend #Daytrading #Investor #HotStocks #Trader #Stocks #Options #Finance #Money #Winning #Business #SwingTrade #ValueInvesting #Focus #WallStreet #Watchlist https://t.co/xEecq2rmkd https://t.co/zXv6ARvL4Z	positive
Analysts Anticipate Pentair PLC $PNR to Announce $0.44 Earnings Per Share https://t.co/tiXqVblfr3 #stocks	positive
@NorthmanTrader @JeffBezos He going for a trillion $ when $AMZN hits $20,000 a share	positive
Closed Buy XTIUSD 38.98 for -72.0 pips, total for today +21894.0 pips @. VIP Follower .@JoseDavidBurgos @. #crypto #forex #stocks .@	positive
RT @anuragchawla32: Did you know during the first half of the year 2020 the stocks that moved Nifty 50 Index towards upside were: 1. Relia…	positive
@Sandro_power $AAPL win	positive
RT @rahulgchaudhary: The Day AppGet Died by @kbeigi https://t.co/dDrYuhmKTm #Appget #Winget #Windows #Microsoft #Package #Management $MSFT…	negative
Can GoPro Survive the COVID-19 Market Meltdown? @themotleyfool #stocks $GPRO $AAPL https://t.co/CR0Vf5AVjD	neutral
RT @Callum_Thomas: 2. While the index is trading above its own 50dma, only 38.6% of S&amp;P500 companies are trading above their own respective…	positive
$JPM: New SEC Filing for $JPM: Form 424B2 (No. 0001615774-20-007435): https://t.co/06r1vt3gOG	neutral
$AMZN Talk about strength.. I’m glad most Large Cap ETFs in my IRA’s are loaded up. https://t.co/1MnZr40iM3	positive
RT @mchaudhry82: Thursday’s 👀2: $QQQ $SPY $UVXY $TVIX $TSLA $NFLX $MSFT $NVDA $MU $SNAP $PYPL $SQ $TWLO $TWTR $V $ZM $ROKU $TXN $WORK $ZUO…	neutral
RT @SilverChartist: ⚛️Both the fundamentals and technicals strongly suggest that recent sideways trading ranges in most #URANIUM stocks are…	positive
Growing Vegetables - Spine Gourd Farming is Profitable Agriculture Busin... https://t.co/8LbfNg5XL8 via @YouTube $DAX $SPX DEPRESSION USA ~ Community can try.. Thanks TRUMP	positive
RT @mercadomagico: Monopolies are always bad for the consumer Keep your yes open 👀 $NMGC NeoMagic's https://t.co/gzPGOV7s8h @mercadomagico…	negative
Amazon Cuts Commission Rates for Advertising Affiliates @themotleyfool #stocks $AMZN READ MORE: https://t.co/ydt4QcbkcQ #AdBuy #adsense #advertisement #advertising #ProductPlacement #Promotion #Traffic~	negative
RT @callieabost: It’s early, but the S&amp;P 500 is heading for its third straight day of losses, which would be its first 3-day losing streak…	negative
1/ Thread on my latest for @YahooFinance &amp; @gurufocus, "Why the Fed's Bond Buying Is a Recipe for Trouble" TL;DR: The Fed's interventions may threaten the stability and integrity of credit markets – and of all capital markets. $JNK $SPY $SPX $SPAB $SPHY https://t.co/pH0N6DeKPD	negative
purchases today using 2020 Vision for 2040 Relaxation: $PPL, $MO, and $XOM all in my #RothIRA. #investing	positive
RT @williamoneilco: "Be patient, keep studying, and be 100% prepared. Later, at the least expected time, when all the news is terrible, win…	positive
RT @Alpha_Bronze: Kroger stunned with 92% e-commerce gain; has to prove it’s not a coronavirus blip. Largest US supermarket chain lagged co…	positive
$JPM next week calls https://t.co/fPlfuuvYGW	neutral
RT @robenfarzad: Next week on @FullDRadio: @KaraSwisher 💾 https://t.co/nnXl32Urir | NPR One | @Spotify https://t.co/dKSyD6sNJh #Silicon…	neutral
Skim the cream of financial news $TWTR $FB $LNKD https://t.co/7gg0FoRUNF https://t.co/qftGI8Lvvl	neutral
$AMZN want in! Finally! We got a runner! https://t.co/P1tyfGUfCU	positive
Chesapeake Utilities $CPK Set to Announce Earnings on Wednesday https://t.co/8Hc5s2UoSp #stocks	neutral
Aaaaand I gave it back on a failed breakout for $gene #daytrading #stocks https://t.co/X6acTxvxuW	negative
RT @PipsToDollars: $FB A growing number of companies have pledged to suspend advertising on Facebook. Here’s a list https://t.co/YioWNSU1w…	negative
$AVGO $ZM $HPQ $GE $PINS $PENN $SPCE $BAC $QQQ $DOW $ACB $UAA $WFC $ETSY $RCS $NFLX $AMZN $TOL $DIS $EBAY $DJI $ORCL $INTC $HPQ $GOOGL $BRK.A $TCS $INFY Get instant updates and free trading analysis click here https://t.co/USlOOzZoZk https://t.co/SkM1BckY2Y	neutral
RT @andrewnyquist: Check out my latest: "Bear Market Rally Stumbles at 38.2 Fib Levels; What's Next?" - https://t.co/Z5vU7sZWS7 #IBDpartn…	negative
RT @Lakshmi_888: #SPX $SPX #ES_F #Dow $NQ #NQ #NDX $RUT #DAX #FTSE $ES_F $QQQ $Dow This *cld* retrace to 1st yellow rec Be v careful as t…	negative
RT @JAXCapital: so China has been THE driver of global growth the last decade now that it seems everyone wants to blame china for covid -…	negative
RT @AndreyGodsonn: @andyrao316 Funny how falling companies $DAI $BAC $ERIC are banning $ZM while and successful $FIVN $CRM $ORCL endorsing…	positive
Market Quick Take - May 28, 2020 #Macro #forex #stocks #commodities https://t.co/Felks3LmQo https://t.co/J6GAD66Vmn	neutral
Lennox International Inc. $LII Expected to Post Quarterly Sales of $1.03 Billion https://t.co/YvqQIemRqX #stocks	neutral
Around 90% of the world’s fish stocks are being overfished #Fish #Stocks #Fails #Trend https://t.co/uvYMZTRpvq	negative
RT @RichLightShed: Disney's Unique Vulnerability to #COVID19 Should Keep Investors Away and We are NOT Talking About its Theme Park Exposur…	negative
RT @LMT978: $AMZN hit +$1,000 today since I made it our Chart of the Day best idea for Members on March 25. I am currently +48% in my ope…	positive
RT @BravoLima78: Great lotto Friday today. @psk2329 was money on his $AAPL &amp; $AMZN puts. Also got in some $NVDA &amp; $NFLX for a nice end to a…	positive
$SPY $SPX $QQQ $USO $UCO $SCO $ES_F $NQ_F $RTY_F $ZB_F $GC_F $NDX $RUT $AAPL $NFLX $AMZN $SHOP $CHWY $ZM $BA $TSLA $FB $MSFT $DIA $IWM $QCOM $GDX $DAX $BYND $TWTR $GLD $SLV $GE_F $BABA $TLT $LYFT $VXX $TVIX $VIX $XLE $XOM $JPM $GS $GOOG $DIS $IBM #Options #Stocks #NASDAQ #SPY https://t.co/IxsXdJ8l9M https://t.co/46qdAnNON8	neutral
FedEx removed its branding from NASCAR's Denny ... $AAPL $AMZN $BTC $ETH $FB $GOOG $MSFT $QQQ $SPY $TSLA #cnbc #foxbusiness #business #money #entrepreneur #trading #investing #investment #stock #stockmarket #forex #crypto #cryptocurrency #Bitcoin #Ethereum #Coinbase #Robinhood https://t.co/oiMjKwmrUl	negative
$9,800 total gain this week! Holding some contracts of $TSLA and $AMZN for next week. Thank you @EliteOptions2 @BeastModeTrades for the continued valuable service. The levels and guidance are greatly appreciated. Have a good weekend everyone! 🙏👩🏻‍💻📉📈🚀💵 #OptionsTrading https://t.co/1T1qucZnf8	positive
RT @eWhispers: #earnings before the open tomorrow https://t.co/lObOE0dgsr $BA $GE $MA $SPOT $HAS $ANTM $APRN $YUM $HUM $AMT $GD $NOC $V…	neutral
$SPX I think that was the retest of the top. to hades you go📉😈 https://t.co/PkwIWLDMxp	neutral
Just " Sucking out that premium " this afternoon..... $SPX $SPY IMO	neutral
RT @LiveSquawk: $FB | Target To Pause All Ads On Facebook And Instagram For The Month Of July - NBC	neutral
RT @CapitalTrends: After #DrReddy, #Cipla, #SunPharma, #Lupin also hits #52weekhigh. For more such #stocks, visit at - https://t.co/Eayw0df…	neutral
Actionable Options Tuesday, April 14, 2020 $C $BAC https://t.co/s3WrFyfiTU	neutral
RT @MahiMahi_Girl: This should open your eyes at the upside potential on $ZHUD $NE $NTN $NCTY $CHCI $COHN $VVPR $AFH $EMBL $AAWC $SEGN $IT…	positive
June contract charts in $CL_F are available to our members. Expect #oil to extend lower. Follow for more updates. #Elliottwave #Trading #Stocks #Oil #Total #CRUDE #OPEC #XOM $XOM $XLE	negative
Purchases today using 2020 Vision for 2040 Relaxation: $PPL, $MO, and $XOM all in my #RothIRA. #investing	positive
Sentiment for $AMZN out of 231 total scores; 87 % is positive and 13 % is negative. #sentiment https://t.co/gBlbcU8Kfk	neutral
Apple | $AAPL AAPL: Running out of steam (short term) Long or short it with BTC on Trade8: https://t.co/7Y3lSIZqdd https://t.co/DJV732lLPv	negative
$NFLX +6.8%, $FB +4.8%, $AMZN+4.2%, $TSLA +4%....	positive
$SPY $IWM $AAPL $CAT https://t.co/zejsfSJAfm	neutral
RT @d_kab1: $SPX bearish divergences on all timeframes below 4hour, multiple indicators including MACD/RSI	negative
EZCORP Inc $EZPW Receives Consensus Rating of “Hold” from Analysts https://t.co/mqwhh0RIsX #stocks	neutral
True Economics: 6/5/20: S&amp;P500 and Fundamentals: What should matter, doesn't ... https://t.co/gg5jA2VE7p $SPX $SPY #corporatefinance #earnings #EPS #equities #financialrisk #investment #Markets #stocks #COVID19 #COVID2019	positive
@chrissyfarr @zbiotech Good news for health insurers $UNH $ANTM $HUM $CI They will mint more money now💰	positive
RT @ToneVays: With only 1 hour to go, $SPX is on a Trifecta of a Rejection. 1. Perfected to TD Sell (Also many stocks like $AAPL, $GOOG, $F…	negative
RT @_SeanDavid: Interesting New Facebook Patent: $FB Allowing general users to turn photos into ads. ie. Users would now monetize their…	positive
Last update of day, still short on small caps $IWM $RTY_F for EOD sell off. Trump news conference at 5pm concerning China. It would be funny if it's about banning TikTok. $QQQ red, $SPX $DJI positive. https://t.co/VcsQy6ooBl	positive
UPDATE 1-Minerva's schizophrenia drug misses main goal in study; shares tumble $NERV $AGN $JNJ https://t.co/l5Ihr3iyl7	negative
RT @commodi08973633: TARGET ACQUIRED $CMS This looks bad, sell at $60.29 Take Profit: $58.02 Stop Loss: $60.89 I give you $50: https://…	negative
RT @MMeatloaf7: CHINA TELLS STATE FIRMS TO HALT PURCHASES OF MAJOR U.S. FARM PRODUCTS $spy $spx	negative
Apple Option Alert: Jun 26 $350 Calls at the Bid: 400 @ $4.951 vs 5214 OI; Earnings 7/28 After Close [est] Ref= $346.5 $AAPL	neutral
RT @Sam_Chaudhary09: @wegopro @Unicorn_Watch @CoinDeskMarkets @jasonappleton @Brad_Laurie @TheCryptoLark @CryptoNewton @CryptoMichNL @digis…	neutral
RT @realJosephRich: Tim Cook furiously trying to save the NASDAQ by buying back $AAPL stock funded by debt bought by the Fed is the lowest…	positive
RT @KobeissiLetter: S&amp;P 500: $SPX 2008 VS 2020 COMPARISON. We see a near identical setup now in a three wave bear market as in 2008. Bega…	negative
RT @StockBoardAsset: On day one of official recession - SPX500 attempting to close gap near record high https://t.co/srIG9ibdRV	negative
RT @crushthemarket: I Think A Better Question Is How Far Will The #FED Allow #Stocks To Fall Before They Add To #QE? "How Far Will The Fed…	positive
Microsoft to permanently close all of its retail stores https://t.co/e0bIUI4JLS $MSFT	negative
RT @nareshbahrain: Take one #Stock per week. just one &amp; do a very detailed study. Without your knowledge, over a period of time u will gain…	positive
@Tesla beat @ToyotaMotorCorp to became the most valued automaker. Again. The end of quarter delivery push has also pushed the #stocks price into the stratosphere. #Tesla #ElonMusk #ElectricVehicles https://t.co/R6zvNh7uJG	positive
Analysts Expect Kezar Life Sciences Inc $KZR to Announce -$0.26 EPS https://t.co/FnGtkF5Ts6 #stocks	neutral
RT @ukarlewitz: $SPX concentration highest since Hotel California released. Spot the correlation https://t.co/fpuL80jhRZ	positive
Zacks: Brokerages Expect Enova International Inc $ENVA Will Announce Quarterly Sales of $340.53 Million https://t.co/1X6YtV1bOc #stocks	neutral
Big Changes May Be Coming to Your Next Stimulus Check @themotleyfool #stocks https://t.co/Ev0pFXKVRo	neutral
Spiking $AMZN $TSLA not about bubble. But personal issues between Elon and Musk. Whose dick is longer	negative
Microsoft revenue up 15%? Lol. Incredible that a trillion dollar company is still able to grow double digits. $MSFT (I own it.)	positive
RT @CGrantWSJ: $JNJ CFO Joe Wolk tells me he wasn't 100% sure until last week that the company would be giving 2020 guidance today. Their a…	neutral
Pelham Long/Short Master Fund Limited short position in WM MORRISON SUPERMARKETS up 0.14% to 1.65% #MRW $MRW #LSE #StockMarket #Stocks #Shares #Business #Markets #Trading #News #Investing #Short https://t.co/vM411LdLkR	negative
RT @BWUIC: $AAPL $AAPL $GOOG - DOJ's Apple probe focusing on App Store payment rules - Bloomberg https://t.co/L23LWK2bHy	neutral
RT @JRamsbunctious: $GMGI continues to climb and longterm #investors are loving the consistent gains. #investment #investments #stocks ht…	positive
Gary Shedlin Sells 2,625 Shares of BlackRock, Inc. $BLK Stock https://t.co/e2eXvUSk0D #stocks	negative
Shortcuts Rewind: Working with Apple Notes, Part 1 https://t.co/nET2jnzAdO $AAPL https://t.co/LoIEK2in70	neutral
RT @winstapro: ES_F stuck in the range. Let see if it holds 3140 $ES $SPX $AAPL $AMZN $BA $FB $GOOGL $NFLX $NVDA $TSLA $ROKU $SPOT $SHOP $…	negative
Long $FB https://t.co/doXfAKVWDP	positive
Huge variation: Mead Johnson Nutrition Company $MJN 70.72 up 4.12% 4:02pm https://t.co/Pa7hlovGSJ #stocks	positive
RT @apollotradingsd: Saturday: country descends into chaos Sunday: chaos deepens Monday: $SPX rallies 2% for no reason, Trump declares…	negative
The financials are new for me. Why? $XLF is at support, and RSI vs. $SPX is extremely low. Q2 earnings starting this week will be lousy, but I suspect they rally soon, maybe with the Fed as catalyst again. https://t.co/rlgxRRNqM1	negative
$JPM looks ready to die. This is a micro-version of @RaoulGMI chart of European banks on the cliff of death months ago. https://t.co/Ye9dgewNGm	negative
Character Group – An impressive earnings history #stocks #trading ... https://t.co/j1Dil6V5Tz	positive
$BRK.B $BRK.A - Berkshire Hathaway: Buffett Isn't Buying. https://t.co/yUZZm7lj9K #markets #stocks #investing	negative
RT @KimbleCharting: Commodities creating a long-term double bottom at the 2009 financial crisis lows? $DBC $GLD $SPX $SLV https://t.co/tZE…	negative
RT @Investingcom: BREAKING: *AMAZON SURGES TO NEW ALL-TIME HIGH ABOVE $2,270 AS #CORONAVIRUS LOCKDOWN BOOSTS DEMAND $AMZN https://t.co/O…	negative
Nucor Co. to Post FY2021 Earnings of $3.15 Per Share, KeyCorp Forecasts $NUE https://t.co/FrK6cWxdJ6 #stocks	positive
RT @TrueBubbleHead: Notable inside weeks: $AAPL a pause after an epic run up, $BAC upper shadow inside a bearish candle... could be tellin…	positive
@Microsoft $AAPL $AMZN $BTC $ETH $FB $GOOG $QQQ $SPY $TSLA https://t.co/MbysAmfhaB #money #entrepreneur #trading #investing #stock #stockmarket #forex #crypto #Bitcoin #Coinbase #Robinhood	neutral
$mu We have detected a noticeable fall in the Zeitgeist for Micron Technology, Inc. at https://t.co/Y1gBzDragg Visit DataSwarm Markets for more information #STOCKS #NASDAQ DataSwarm ref: 102990	negative
Imagine being #Mnuchin or #Kudlow at the moment, trying to explain to the dumbest man that's ever occupied the White House what would happen if he fired #DrFauci. Ever have a migraine? Ever develop a nervous tick? $SPX $NDX $IWM	negative
RT @mwcartoons: At the Corona Fair... #oil #barrel #oilbarrel #oilprice #stocks #opec #usa #shaleoil #coronavirus #bats #china @CartoonMove…	negative
RT @SorabNY: Today’s profit $544 $spy $spx $tsla $ba $amzn #Daytrading #News #Invest #investing #Finance #Money #Life #NewYork #wallstree…	positive
USTrading Stocks Apple $APPL Facebook $FB Amazon $AMZN https://t.co/sRBfwUBKBk https://t.co/LBzFFVmo3P	neutral
#stockedgeclub #biocon stock is in bull market after sharp rally it is consolidating in a ascending triangle , RSI &amp; MACD bullish staying above mid bol 350 stock may anytime resume upmove and once it breaks above upper bol 371 it can create new high #NSE #Stocks https://t.co/FdkmLhXO8F	positive
$DIS Above $115 this looked like it wanted above $120! Got above $115, hit $120, retested $115, now above $120. I could see it trade in range of $120 to $130. https://t.co/bZlLZLhQoj https://t.co/RRSB34FJhr	positive
PayPal, Intuit, Square Get Approval To Give Loans To Small Businesses As Part Of $2T Federal Coronavirus Relief Package $INTU $PYPL $SQ Also $AMZN $FB https://t.co/JdPauIit2T	positive
20 retweets and likes for some trade ideas before they happen next week...go!! $SPY $FB $TWLO $TSLA $AAPL $BYND $ES_F	positive
#Stocks suffered a huge technical damage today after markets got spooked by California shutdown We see what upside down hammer means on the hourly chart. Our daily chart has the same hammer Is this a bear trap or a major turning point? #StockMarket https://t.co/WSwrMFC0WF	negative
RT @theponzifactor: 📺 Recent interview on @Renegade_Inc Real [#economic] growth should not be measured by how much a company sells. It sho…	positive
RT @ISABELNET_SA: 📌 Subscriber Access The #stockmarket valuation, the short- &amp; long-term forecasts, and the equity risk premium have been…	neutral
$SPLK #Stocks #StockMarket #Splunk reported Q1 EPS on https://t.co/savSNTKlN1 https://t.co/AmbIdDTC97	neutral
@SlowdownAhead @BluedeerC $msft $goog $FB earnings and their positive tone means nothing. They are hugely dependent on macro economy and should not be the ones we lean on to forecast economy.	positive
Both $TSLA and $AMZN have seen a recent surge in volatility while $SPY is seeing a fall in volatility. Expect tech stocks to see mean reversion soon. https://t.co/DlyhwTrCp0	negative
RT @SethCL: $VIX $SPX From within this weekend's Research Report. Subscribe to unlock! 41 pages of technical, fundamental and macro-analysi…	neutral
RT @Reveretrading: July 7 Plan📌 *Click on Picture to Expand* Thank you all for the feedback. I'm getting hundreds of DMs, I will do my…	neutral
RT @AlwaysTrading1: If $DIS keeps this up, Mickey is going to need to get a job with $GRUB	positive
$AAPL - Apple's Irish tax appeal reaching decision next week https://t.co/UCd8COnagX	positive
$gnpx People make no sense. This company is in fast track FDA trials for A CURE FOR LUNG CANCER. They obviously already demonstrated it works. Should be trading at least 3x higher. $immu $meso $btc $mrna $pfe $mrk $msft $gene $nio $ino $htbx $ge $amzn $baba $lk	negative
$AAPL .. Why INVEST in $ZM !! LT!! We R and will live in a New WORLD &amp; $ZM will be a part of our lives! $GOOGL going to acquire $ZM sooner or later ! https://t.co/nOFqlMTNej	negative
RT @ShellCapital: INVESTOR SENTIMENT STOCK MARKET POLL: What direction do you believe the US stock market will trend in the next 6 months?…	neutral
RT @SheepKnowMore: Fake outrage. $FB is an invaluable Deep State election-interference tool. Tantrums like this by their #FakeNews media al…	negative
RT @BrianFeroldi: Great list of free investing resources: 1) Yahoo Finance - https://t.co/Xx3zedsQmJ Most useful tabs: Summary Statistic…	positive
"Sound collision." $SPX #Ramius https://t.co/wTjFIBKi8K	negative
$AAPL #patent 10,680,784 Method and apparatus for controlling downlink HARQ timing in TDD environment #tech #IP #research https://t.co/Hg07Eh2nUA https://t.co/dPT8VDcnLX	neutral
A Big Change Is Coming to the Next Stimulus Deal @themotleyfool #stocks https://t.co/d3EclZJrtt	neutral
Phoenix protesters demand answers after police ... $AAPL $AMZN $BTC $ETH $FB $GOOG $MSFT $QQQ $SPY $TSLA #cnbc #foxbusiness #business #money #entrepreneur #trading #investing #investment #stock #stockmarket #forex #crypto #cryptocurrency #Bitcoin #Ethereum #Coinbase #Robinhood https://t.co/yDKITrQj8j	negative
If market condition improves $dis, $aapl, $fdx, $cost, $cat, $de strike prices can be bought. This are really cheap but timing is important. https://t.co/lQtxSNNg8B	positive
@CryptoCrewNews I am hesitating between $FB, $TSLA and $QQQ puts? What puts do u have?	negative
@NickDeMiro @Gambiste1 @ShitFund $KO should and will see an ESG driven activist campaign in the next five years; Jeff Uber has said as much.	neutral
RT @Prometheus_Cap: Bot $AAPL 380s 1.98 Pray for em.	neutral
$SPY $SPX Trading in this stock market feels like 😂 https://t.co/NylOoF6gge	neutral
Apple's new Iphone SE $AAPL https://t.co/7aydm61XIL	neutral
RT @robintrack: Top increases in # users holding for stocks held by Robinhood traders today: https://t.co/TdMu0cAc6W 1. $WKHS: +30988 2.…	positive
$PG #Options #maxpain Chart, Open Interest Chart Update #OptionsTrading #OptionsFlow #stocks #stock #StockMarket #Investment #investing https://t.co/5JE2nlalc3 https://t.co/cpRmZcIyPu https://t.co/BVDjVPM8qU	neutral
RT @WingGirlTrade: THE TRADING SET UPS - Brand New ebooks to download FREE today Written by pro TI traders * Solid Swing Trading Concepts…	neutral
RT @FactSet: $SPX is reporting a decline in earnings of -15.8% for Q1, which would be the largest earnings decline reported by the index si…	negative
Short Interest in AzurRx BioPharma Inc $AZRX Grows By 95.6% https://t.co/nL0Hpszupo #stocks	positive
RT @NoTimeZone_: It’s always good to know how much a company cost &amp; pays for dividends per share 4 companies I like (of many) that pay goo…	positive
RT @AGBullBarr: $GRCV accumulating on dips this is going penny land👀 $dloc $bbrw $trep $hdup $cgld $tmxn $hwke $gosy $pgas $zhud $brll $am…	neutral
RT @chhlss: Everyone who sold $AMZN at $2,000 https://t.co/zNX3VuBb9v	neutral
Does your life long understanding of games prevent you from winning in the stock market? https://t.co/ZqAxeGfzLw $SPX $SPY $QQQ $DJIA $STUDY	neutral
Bank earnings are out. I think I'd rather own $BAC than $WFC...	neutral
RT @hrgupta12: WEEKEND FOLLOWS #investing #Investment #investors #stocks @dmuthuk @AnilSinghvi_ @trailingtrades @ravi__mehata88 @C…	neutral
RT @charliebilello: Apple has bought back $338 billion in stock over the past 7 years, which is greater than the market cap of 492 companie…	positive
RT @NorthmanTrader: Since @JeffBezos &amp; $AMZN are making a killing due to their entire retail competition being forced to shut down perhaps…	negative
$SATS SP #SATS Ltd. Singapore Daily - Monday, July 13, 2020: KEY HIGHLIGHTS Results SATS (SATS SP/HOLD/S$2.88/Target: S$2.93): 4QFY20: S$51m in credit and impairment provisions; guides For lower loss in 1QFY21. TRADERS’ CORNER Keppel DC… https://t.co/xzT32wBTIy #equity #stocks	negative
Quick trade off the bottom on $AMZN. 😎	negative
Just remember investors who waited for $SPX to retest its March 2009 low are still waiting. Keep this in mind when/if $SPX pulls back 10% or more from current levels, which would put the index around 2550 Personally, I'll be opportunistic if I get another chance to buy &lt; 2600	negative
David White hosts the Power Trading Hour for Tuesday on @TFNN and discussed $GSX $WKHS $MU $SMH $GLD $AMD $MSFT $TJX and more! #TradingView #Learntotrade #PathofLeastResistance #TFNN #TechnologyInsider #financialeducation https://t.co/vzYusS88uL https://t.co/zLJ3VqakKg	neutral
RT @ElCryptoChief: Apple | $AAPL AAPL Long or short it with BTC on Trade8: https://t.co/Ox1Y3JpUaD https://t.co/CzT2cxTk2g	neutral
RT @charliebilello: Apple has bought back $338 billion in stock over the past 7 years, which is greater than the market cap of 492 companie…	positive
$SPY $ES $SPX #SPY #SPX #ES #MarketProfile Weekend Update: https://t.co/L8lIGHZtTO	neutral
Liberty Latin America $LILA Price Target Cut to $17.00 https://t.co/y9CiYQXEHl #stocks	negative
RT @scriptstotrade: $CARV $POLA $VXRT $BYFC Here is our #SentimentCandle Don’t get caught in the wrong side of the trend Green= #Bullish Wh…	neutral
$cof $dfs $axp $V impressive	positive
In haste I missed these levels mentioned in my private group 3194 3185 3172 It now looks like some of these levels is becoming possible play. #es_f $spx $spy #options #futures #markets #trading https://t.co/HVkwZOVn2X	neutral
RT @TicTocTick: Why are stock looking so strong 💪 What do they know that most don’t 🤔 I think a very big buy is about to start soon It…	positive
Everyday #optimism +1% before market open $SPX $NDX Futures climb on optimism over swift recovery https://t.co/hTjepmWXS8	positive
RT @TheStalwart: Stocks just went negative on news that $AAPL is going to close some sores in the US again https://t.co/8AqBKEIBQ4 https://…	negative
Short Setup ES 75 stop 79 Please note this message is delayed by 5 mins. For Real Time Messages please see our website for FAQ's https://t.co/YkAlNRdUSE or contact me on info@tradeinflection.com #ES_F $SPX #trading #NQ_F #RTY_F #DJIA $NDX #YM_F #RUT #DAX #FSTE	negative
How could the #USadministration pick a #vaccine when not one #Phase1 has finished? How they can pick $PFE $MRK or JNJ if they didn't even made clinical trial? How the selected $MRNA who didn't provided any data? This is not about health but about money. Trump failed this country	negative
Gonna try SINO as a gapper this morning. Risky but i like the news. #stock #stocks #StockMarket #stockmarketnews #DayTrading #Daytrader https://t.co/tOQCNMh4sg	positive
Morgan Stanley Raises Algonquin Power &amp; Utilities $AQN Price Target to $16.00 https://t.co/rEbj9pskuV #stocks	neutral
Today's million dollar CALL #options trade update: $GILD $RCL $BABA $BAC $AAPL $AMZN $TSLA $AMGN $SQQQ $MU $NFLX $GLD $SHOP $ALXN $CAT $ZM $BKNG $SLV ... https://t.co/ORtVUPaBpX	neutral
7 Investing Principals #Investing #StockMarket #Retirement #Stocks #Bonds Download our free guide https://t.co/yWXwHQvLLK https://t.co/FwhK03TggJ	neutral
RT @axelroark: If you bought $AAPL at today's price, you would need 28 years to see profit based on current estimates. This is why I'm no…	negative
RT @TheStreet: Here's what to watch when $AMZN reports earnings: https://t.co/gRLyHiNvr4	neutral
RT @NorthmanTrader: Weird how everything in this macro chart has come to pass as it said it would. The chart didn't know the trigger of cou…	neutral
RT stock_family: $GRPN 1.60 then 2.00+ possible er coming 🥌👁👁🧙‍♂️🐐 https://t.co/rePl7Nl6IT - https://t.co/YWb0YTEzG0 #options #stockmarket #daytrader #stocktrading #stockoptions #news #stocks #OptionsTrading $aapl $spy $amd	neutral
RT @musicnews360: Wisconsin senator proposes replacing Columbus ... $AAPL $AMZN $BTC $ETH $FB $GOOG $MSFT $QQQ $SPY $TSLA #cnbc #foxbusines…	neutral
Discord- https://t.co/8fooypATeb a better, more executive trading chatroom $SPY $ES_F $BA $CLVS $SRNE $DVAX $ACB $OSTK $TRIL $LK $CODX $SAVE $GSX $INO $KSS $PENN $NVAX $BYND $AAL $EURN $GPS $SSL $MRNA $TSLA $CCL $BILI $CVNA $DAL $PTON $TWTR $IQ $ROKU $AAPL $DIS $NVDA $AMZN $BB https://t.co/KtAaYAmdlJ	neutral
RT @psk2329: Yuge names reporting next 3 weeks. Lots of “unprecedented times” and no guidance. Curious to see how many of these fade after…	positive
Dow futures rise 150 points as investors shake off a continued spike in coronavirus cases https://t.co/8EJft64zoT #markets #Dow #futures #stocks $SPX #investing #trading #coronavirus #optimism #profits #corporates	positive
RT @TeesFine: $UONE is still doing good on the #StockMarket right now. Short term play. Unexpected. #tuesdayvibes #stocks #coronavirus #Buy…	positive
@michaelbatnick ...hope not, I added some $MSFT during the panic sell-off :)	negative
RT @QuantTrend: 5 BEST stocks for 2020 and beyond... They did well in the current crisis and are viable long-term investments. $BABA $TCE…	positive
RT @SJosephBurns: “Amazon has been an 85 bagger in 14 years while being a large cap the entire time.” - @iancassel $AMZN	neutral
Effective Elliott Wave Atlassian General Electric Nike https://t.co/vglRP919Ev $team $nke $GE #stocks #usstocks #elliottwave #technnicalanalysis #optionstrading #cfds #trading #investing https://t.co/0zyG0NvpHA	neutral
#NTPC NTPC Now @ 98.30 Look @ 100 CE Now @ 3.30, SL. 2.60 #nifty #banknifty #equity #stocks #analysis #trading #sp	neutral
@mtmalinen The $SPX is more like a drunken A https://t.co/ZvlPeFJhJF	negative
Apple Watch Series 5 Now Available Refurbished https://t.co/vhx6m7qHOO $AAPL https://t.co/ozWNHXvMD7	neutral
🤝 $NVDA $INTC Intel and Nvidia turn Merger Monday into a blockbuster sequel https://t.co/wbo0P82pEy https://t.co/y5Q3g9mWq3	negative
Short Interest in Pluralsight Inc $PS Drops By 14.6% https://t.co/L3lPRVry5l #stocks	negative
SpaceX moves ahead with Starlink satellite launch amid pandemic https://t.co/hvezwbTvyI #markets #globalmarket #stocks #StockMarket #stocktowatch #StockMarketInsights #StockMarketToday #StockMarketNews https://t.co/yj48xmTmSj	neutral
Despite all the global issues with unemployment, social unrest, and a pandemic, US stocks are down only a few % in 2020 now. However, the return disparity is massive, as not all ships are in this rise higher #socialunrest #unemployment #stocks #stock #ships #maritime #rise https://t.co/2nmRtw1aWW	positive
Nasdaq continues to lead the way. All our tech #stocks are performing well and we will continue to buy more but for the time being, we'll wait until the other indices catch up. Right now the S&amp;P and Dow are lagging behind so until we have added momentum, we will apply caution. https://t.co/Wktepm0TdF	positive
RT @OpenOutcrier: RECAP 6/25 Unusual Puts: $FXI Sep 38 P $DUK Jul 75 P $DIS Aug 100 P $NCLH Jul02 12 P $JBLU Aug 9 P Live Breaking trading…	negative
ught $amzn 02JUL20 2730.00c	neutral
Keep an eye on the 10 year #yield Down over 7% if it does not go up, I will bet the reversal starts. #StockMarket #stocks #BOOM #bust https://t.co/QkKvuLQBLJ	negative
RT @Reveretrading: This morning #ES_F opened right @ 3032 level, rallied 27 points with 5 points MAE #NQ_F opened above my 9500 level…	negative
$amzn Daily, no longer hold a position here, will look at doing something in the AM. As I said last night, 2500 is coming this week. No question, daily looks ready to go this week! GL https://t.co/AhYsqOare0 https://t.co/zWl4S6KKBd	positive
RT @stockspastor: Have you ever been in a trade that moved $40 in 10 days? $2 to $10 on option. The same thing is about to happen on our…	neutral
RT @Hypifyio: Meet Your Staff! These are some of the best traders in the Hypify Community and their job is to teach YOU! @Prodiggyy26 @_…	positive
$BAC is sitting on the 200-month sma and below both the 200-week sma and 2011 rising trendline. Price action is corrective and a new low should be considered. The new low would be create a bullish momentum divergence. A platform for a more impulsive rally. https://t.co/vd9zirBpuu	positive
#Stocks starting to break down further as I outlined in this weekend video. Indices getting close to levels where technical selling could take hold again. Bulls must remain patient as this could get ugly quickly https://t.co/mKYMbE4arG	negative
RT @philstockworld: Right now in member chat: "It is Monday, so we will have to take it with a grain of salt, but we were oversold and ther…	neutral
Hopefully some of you has this on your watch list. $NFLX $AMZN https://t.co/UFC4kSIWj0	positive
RT @MarketWatch: Big companies like $SBUX and $KO are pulling advertising dollars on Facebook. How much will that hurt revenue? Facebook…	negative
#ORR.96m at 1.51g/t. 7m at 86.39g/t.Main trend 6km. Drilling now a company focused on growth our JV partner. 1.3b cash at hand , process plant already planned at Boto. This has GGP scenario all over it . 3 m cap??. #AIM.#stockmarket.#stocks.#investing.#mining.#gold. https://t.co/d6QlafvEIQ	positive
MCCORMICK &amp; CO /SH NV $MKC Expected to Post Earnings of $1.11 Per Share https://t.co/I1YYoUgoJ3 #stocks	positive
RT @RichLightShed: WHY is @unileverusa punishing Twitter when they took a leadership role and likely led to Facebook's reversal $TWTR $FB…	negative
RT @israel_massa: $JPM | JPMorgan Q2 20 Earnings: - Revenue $33.82B (exp $30.57B) - EPS: $1.32 (exp $1.01) - Provision For Credit Loss:…	negative
RT @50F7W4R37R4D3R: "Motivation gets you going and habit gets you there. "- Zig Ziglar #softwareengineer #javascript #python #C++ #golang…	positive
$SPY ES futures hourly is an interesting watch! Nice potential breakout to the upside to drive the market higher imminent 👀 $QQQ $SPX $DJIA https://t.co/G4v3jObMUC	positive
Quality Elliott Wave Trading #sp500 #ES_F $SPX $SPY $QQQ $IWM $SPXU $SQQQ $ES $NDX $DJIA $QQQ emini forex https://t.co/hTJsqehBX2 https://t.co/zB0jSSy2Mo	neutral
RT @50F7W4R37R4D3R: "Walking with a friend in the dark is better than walking alone in the light."- Helen Keller #softwareengineer #javascr…	positive
@TheStalwart @business be ready for #stocks as well. 2nd wave of sale off is coming now.	positive
RT @WallStJesus: EXTREMELY ACTIVE OPEN, MOMENTUM-SWEEPERS BUSY IN SEVERAL NAMES = $TWTR $VTIQ $NIO $INO $BYND $TWLO $DIS $AMD $TSLA https:/…	positive
Could Apple Be a Millionaire Maker Stock? @themotleyfool #stocks $AAPL https://t.co/Wdz7oGbUwC	neutral
$SHOP had good $FB sub numbers today??	neutral
ADVFN Morning London Market Report: Wednesday 15 April 2020 #stocks #trading ... https://t.co/g3pXJY2JbS	neutral
RT @Lakshmi_888: #SPX $SPX #ES_F #Dow $NQ #NQ #NDX $RUT #DAX #FTSE $ES_F $QQQ $Dow Based on this chart alone (there are others so pls see)…	neutral
RT @NorthmanTrader: The S&amp;P 500 appears to be incapable of making new highs without new highs in the Fed's balance sheet. $SPX peaked the…	negative
RT @WingGirlTrade: If you trade stocks long or short. Trade Ideas FREE trading room is the place to navigate trading today. Moderator Barr…	neutral
RT @kerberos007: $SPX vs $CNH (Yuan) Jaws update The jaws (risks &amp; bubble) grew wider &amp; wider like the "inequality" &amp; social unrest I nee…	negative
RT @intell_invest: Dear Premium Major Markets Members, the Daily Update was sent out. Not a member yet? Visit my website to signup: 1 month…	neutral
RT @apollotradingsd: I'm a permabear at heart. Keeping the following in mind has kept me sane: 1. This is no longer a market. It is a regr…	neutral
Biogen $BIIB Has A Poor #Technical Analysis Score (TA Score). Breakdown Of 3 Categories: #candle score Neutral; moving average score Poor; #momentum score Poor #stocks #stock #StockMarket #Investment #investing https://t.co/Jj64hrH1R3 https://t.co/aZBpbgGaen https://t.co/vKawDwrcoL	negative
Fangdd Shares Surge 610% in Wild Ride; Active Agents Number Jumps - #Stocks #StockMarket $DUO via @CapitalWatchCom https://t.co/lYz8Qq8vqO	positive
$AMZN record high	positive
RT @SheepKnowMore: An $FB post after watching #Covid911 - INSURGENCY. #GreatAwakening https://t.co/7PxeWwIByW	neutral
RT @AlexDelarge6553: Dont look now $tlss up premarket 6% wouldnt merger news with $amzn be perfect for all those people who sold for a loss…	positive
RT @cfromhertz: *APPLE ANNOUNCES IT IS SWITCHING FROM INTEL CHIPS IN MACS *APPLE ANNOUNCES MACS ARE SWITCHING TO OWN CUSTOM PROCESSORS $A…	neutral
RT @Callum_Thomas: 4. Clearly Q2 was a strong quarter. Interestingly as @RyanDetrick shows: strong quarters tend to be followed by stron…	positive
Ciner Resources $CINR Set to Announce Earnings on Monday https://t.co/NbHpMCDfHv #stocks	neutral
Market's open! Check out @MightySoldiers day trading livestream! Featuring Benzinga Pro! real-time news, LIVE squawk, audible alerts, and more! #stockmarket #stocks #charts #daytrader #daytrading #livestream #live #youtube #benzingapro https://t.co/H6Nryjsek2	neutral
economics are important, but don’t get turned off this is a primer for DOM think of it simply as supply + demand ♋️ DOM gives a list of # lined up to buy + everyone lined up to sell but what if neither will budge? ex: ( $spy $spx $qqq #es_f )	positive
RT @faaaal: $appl $amzn $msft $tsla be greedy when others are fearful and be fearful when others are greedy! https://t.co/1SW5PHngEB	negative
Learn to manage stock market risk with position sizing. https://t.co/cCsJaxHap4 $SPY $SPX $QQQ $DJIA $STUDY	neutral
��😷🤢 $SPY $SPX $QQQ $IWM $DJI $AAPL $TSLA $FB $AMZN $GS $JPM $BAC $C $GOOGL $SPOT $XLE $BA $BABA $UVXY $LYFT $CMG #ES_F #coronavirus #COVID19 #BREAKING #bitcoin https://t.co/RXphnpS5eX	neutral
RT @leadlagreport: Analysts are bullish, expecting the $SPX to rally to above 3200 within 12 months #stocks #markets #economy #investing #f…	positive
Huge variation: The Goodyear Tire &amp; Rubber Comp $GT 28.58 up 4.12% 4:00pm https://t.co/Pa7hlovGSJ #stocks	positive
$TWTR $FB https://t.co/8ZsZjeBsJk	neutral
Many Americans used part of their coronavirus stimulus check to trade stocks https://t.co/m9idEoSaJm #stimulus #stocks	neutral
#Options Flow Grid Update $ORCL #OptionsTrading Oracle Shares ⬆️1.28% to $56.19 #OptionsFlow #stocks #stock #StockMarket #investing #Investment https://t.co/5JE2nlalc3 https://t.co/3SMt2yWyzC https://t.co/HYTksUCJxb	neutral
RT @NorthmanTrader: In 2019 $AAPL made new all time highs on declining earnings growth. In 2020 $AAPL made new all time highs on declining…	positive
$MSFT Microsoft all time highs $AMZN Amazon all time highs $NFLX Netflix all time highs $FB Facebook all time highs $APPL Apple all time highs $GOOGL Google nearly all time highs Talk about the big boys doing the heavy lifting	positive
Corona blew a 28-3 lead over racism $spy $spx $qqq #es_f	negative
Clovis Oncology $CLVS Given Average Recommendation of “Hold” by Analysts https://t.co/BAN4GQE2Gx #stocks	neutral
Actions and opinions in a market are influenced by that. BTC is behaving like a risk asset at the moment and we can see that in the chart and in the correlation with the SP500.	negative
Alcoa $AA PT Lowered to $14.00 at JPMorgan Chase &amp; Co. https://t.co/gVyp4WTFK4 #stocks	negative
Anyone play #tankers? #STNG Looks like a good entry price here... #daytrading #stocks #fxtrading https://t.co/xfIYvjIAUe	positive
RT @AdamMancini4: In this 3 week $SPX rally we've only had 1 pullback lasting more than one day from March 31-April 1. For the next one- id…	positive
Join the most profitable trading alerts chatroom also free trial 20 days https://t.co/waJXnpiwFQ $MGM $BA $BABA $FB $TSLA $AAL $DKNG $ERI $XSPA $AMZA $BAC $GILD $SHOP $CHWY $UBER $GNUS $HTZ $AAPL $NFLX $USO $PENN $KTOV $IDEX $SPY $MVIS $WLL $GNC $JFIN $HTZ $CIDM $DLOC $WKHS 💖 https://t.co/xYRNykqFEV	neutral
🔥Our forex results for month of APRIL.🔔🔔 CUMULATIVE RESULT : 4500 PIPS 🔥🔥🔥 Best signals channel ever : https://t.co/ZCdNusdOPO #CRYPTO #stocks $BTC $ETH #FB #fx #forextrading #USOIL #forexsignal #GBPUSD #AAPL #Forex $BTC #XAUUSD #EURUSD 870428730 https://t.co/vDtmCTqcCC	positive
https://t.co/9VjKMnpm7n #CosanBrasil Cosan up 5.3% = $134.8 million gain. $CZZ has made notable gains in 11 of the last 42 trading sessions. #stockMarket #stocks #trading #market #investing #NASDAQ #NYSE #consumerNondurables #specialty https://t.co/JyB85IR23f	positive
$ES_F $SPY $VXX $NYSE #SP500 #stockmarket #marketinternals #forex #markets #equitymarket #investing #equities #Futures #Trading Recap: Today's trading report bias+1 bullish sent 7/10/20 8:50 AM (ET) upper target+5 at $3168 cash high $3168.5 https://t.co/sf0iBaMU5s https://t.co/pCVl82Vo6G	positive
$spy $gspc $aapl $nflx $goog $tsla Wells Fargo's 'idiosyncratic' Gap upgrade due to Athleta and real estate value https://t.co/KXXTKR52MT	positive
RT @RafKadian: #es_f @ 3200 lower stop to 3211.30 if stay short till 1 star support to zone1 #sp $spx #sp500 https://t.co/CoPkj6c4Lj	negative
Oddly low volume right now. It’s spooky. $NQ $ES $QQQ $NDX $SPY $SPX $DXY $TRIN	negative
If believing in $DIS makes me rich ima going to Disney world that week	positive
#USDCAD Tp2 done.✅ Another successful trade with 40+ pips PROFIT 🔥 Closing soon join now: https://t.co/bn8S6tN51e #EURCHF $BTC #FB #forextrading #XAGUSD #fx $ETH #Forex #stocks #XAUSUD #AAPL #forexsignal #CRYPTO #EURUSD $BTC 195451096 https://t.co/tiinG8MiKF	positive
@CJ_Johnson17th and $FB	neutral
Stock Alert For NNN - National Retail Properties Alert Type: Daily Percent Price Change Value Hit: -6.89% #dividend #stocks $NNN Visit Custom Stock Alerts https://t.co/Oh8lrY1YRH	negative
RT @amir: New: Microsoft’s rival to AWS, called @Azure, is a success but has buckled under recent covid-19-related pressure &amp; also has had…	positive
Grab This #opportunity #Offer Valid Till 21-04-2020 Required Capital: Rs. 15 Lac Committed Return: Rs. 15 Lac + 2.5 Lac = Rs. 17.5 Lac Time: 06-15 Months #Stocks Cash/Future #Index Future #Option #Gold #silver #CrudeOil #copper #Naturalgas #nickel Charge: Rs 2.70 Lac	positive
Another one this morning. $SPX $ES_F https://t.co/Yyr48PEC4l	neutral
RT @AdamMancini4: We got the bounce to 3120 in $SPX and this has been the battle zone. Next up is ~3190 and this area is key being the down…	negative
RT @sprtcrdlui: $TSLA closed up again. Load dips . Ride this one higher $BA $NCLH $OAS $IDEX $WKHS $DAL $FCX $SHLL $Z $TTI $NFLX $M $API $…	positive
Facebook $FB Hits New 12-Month High Following Analyst Upgrade https://t.co/kNWZunQ9SP	neutral
RT @KobesyTrades: $DJI closing over 24K and 200ema on weekly with a green hammer 🔨 ... hard to be super bearish #equities with current char…	positive
$MET Metlife #Options #maxpain Chart, Open Interest Chart Update #OptionsTrading #OptionsFlow #stocks #stock #StockMarket #Investment #investing https://t.co/5JE2nlalc3 https://t.co/yLie0GnIqK https://t.co/o4ETbe07bb	neutral
RT @MaxNisen: Still extremely early and don't know if it'll work in the real world, but $PFE/$BNTX vaccine data showing what you want in a…	positive
RT @freebirdcapital: The greatest driver of inequality today is financial asset #Inflation, which is a direct result of monetary expansion.…	positive
RT @AdamMancini4: I posted yesterday 3130 was target above 3100 in $SPX and its been hit exactly. Above here targets 3200, but bears have a…	neutral
RT @nifty_analysis: Top 7 stocks to trade for intraday on 14th July 2020. . #intraday #stocks #stockstowatch #share . https://t.co/3AfsZD92…	neutral
Cfra Lowers AT&amp;T $T Price Target to $37.00 https://t.co/m5IWUn0YQr	negative
Next week buy $GILD $TMUS $ZOOM $HD $BYND $WEN $XRP $CIM $F $BAC	positive
RT @PeasantPig1: With $AAPL $FB $AMZN $NFLX green there is no need to worry	positive
RT @d1rtydan: $msft $aapl and $fb are going to run in the next week or two I can feel it in my bones	neutral
RT @mtatsis: Exactly why Instagram will die. $SNAP $FB	negative
RT @IndexPulse: A huge collection of #StockMarket related books Starting frm basics of #stocks, #candlesticks, #fundamentals, #technicals,…	neutral
S&amp;P 500 | $SPX | $SPX500 $USD SPX500 showing mixed signals? The result of money print? Long or short it with BTC on Trade8: https://t.co/7IRjHNUtDw https://t.co/ll2SKqJDbw	neutral
Best trading books|How to keep stop loss? https://t.co/CsO5ltfkO4 via @YouTube #nifty,#intraday,#investment,#Stocks,#crash,#stockmarket,#doublebottom,#technicalanalysis #stockholm #stocks #stockings #stockmarket #trading #investing #reliance	neutral
SwingArm Trading. RED LIGHT / GREEN LIGHT. Chart Review. #ES_F #indices #stocks #Futures #trading #useThinkScript #ThinkOrSwim #education #volumeprofile https://t.co/za2tsyBQ7O	neutral
RT @TheeFinanceGuy: 🚨It's Time! 🚨 Rapid Fire Stock Analysis is officially OPEN! ⚡⚡ Rules are easy: -Follow -RT -Send me any stock ticker…	positive
$AAPL #patent 20200227010 ELECTRONIC DISPLAY PARTIAL IMAGE FRAME UPDATE SYSTEMS AND METHODS #tech #IP #research https://t.co/dzjlilA223	neutral
Hey @ATSGinc did you guys just sign a contract with $AMZN or did the market already forget about that? $ATSG $AAWW $CJT.TO @CNBC @jimcramer	negative
"BIG #COMEBACK FOR CHINESE #LUCKIN #COFFEE ( $LK) TODAY" ... Stock has rebounded by +72% to $4.45 so far today. Big buyers as shorts are trying to cover. Company is expanding like crazy. More stores than Starbucks in #China. https://t.co/bl22xbFYkX #stocks #trading #profits	positive
$IBIO is an ideal play on the COVID-19 outbreak. $NNVC $MRNA $INO $GILD $NWBO $AVXL $TOMZ $AMRN $ACST #biotech #news #stocks #ibio #coronavirus #covid19 #pennystocks https://t.co/sVKkk51ueO	positive
RT @5stocksinto: 5 Chinese Stocks Into Dairy https://t.co/NueutRQucw #China #Agriculture #Stocks #Investment #Dairy #Farming #Food #Beverag…	neutral
$2173 a day keeps the 9 to 5 away. Don't miss out, buy my stock course &amp; learn investing, become Financially Free With Stocks - Video Course on @GUMROAD https://t.co/ctm70UM0Rd #stocks $fb $aal $ba $mtch $tsla $twtr https://t.co/TOF4Yg16f1	positive
$AAPL $272.50 PM.. wants $260 test.	neutral
Mindful Tip #015: Each losing trade is an opportunity to learn. #TradingPsychology #Perspective Follow us for daily powerful trading psychology! $spy $qqq $dia $tvix $aapl $amzn $goog $msft $zm $tlry $cgc $gsx $tsla $lyft $work $spce	positive
$SPX $SPY Nice gap up 🚀7/15 320 call bought on Friday gonna pay. Also holding a longer dated call spread, let's rip it 🤑 https://t.co/wzuNFoM5ex	positive
RT @OptionsProVol: #Options Flow Grid Update $AAPL #OptionsTrading #Apple Shares ⬆️0.54% to $368.5033 #OptionsFlow #optionstrade #optiontra…	positive
$FB Twitter Sentiment on 1 Jun 2020 was: ▒ Positive 38.3% █ Negative 16.5% ░ Neutral 45.2% ▒▒▒▒▒▒▒▒███░░░░░░░░░	neutral
RT @SheepKnowMore: An $FB post after watching #Covid911 - INSURGENCY. #GreatAwakening https://t.co/7PxeWwIByW	neutral
RT @R_H_Ebright: @Poison_Oyster $JNJ AdVac looks like best near-term prospect (no theoretical risk of contamination by active SARS-CoV-2; h…	positive
Nifty Trading Levels for tomorrow 03-07-20 #Nifty #Nifty50 #NIFTYFUTURE #NSE #Indices #stockmarkets #stocks #Levels #SKARSH @daytradertelugu https://t.co/So7EoMVC9c	neutral
Avadel Pharmaceuticals PLC to Post Q2 2020 Earnings of -$0.17 Per Share, Piper Sandler Forecasts $AVDL https://t.co/VjqwKt3YC7 #stocks	negative
RT @BlogJulianKomar: Here is how I find great #stocks: 1) Exploding price or volume catches my attention 2) Look at the weekly stock chart…	neutral
💪 Wall St Solver Power Rankings 💪 🥇 $AAPL ▪️ Apple Inc. 🥈 $TSLA ▪️ Tesla Inc 🥉 $MSFT ▪️ Microsoft Corporation Rankings ➡️ https://t.co/Kwu6r1EkES https://t.co/Kwu6r1EkES	neutral
Analyzing Viper Energy Partners $VNOM &amp; California Resources $CRC https://t.co/bEAIaylXkb #stocks	neutral
RT @Submarineering: #AI #biotech #Robotics #nanotechnology #fintech #Brexit #TradeWar #stoxx #Ibex35 #trading #nasdaq #sp500 #spx $spy #…	neutral
I have no idea what this Coronavirus thing is everyone keeps talking about, I just know the markets are paying VERY HANDSOMELY to be long right now. Shoutout to the bears that keep losing money. That @NorthmanTrader sure is an idiot!! $spy $iwm $qqq $iwr $amzn	negative
$TACT #Stocks #StockMarket #TransactTechnologies released Q4 EPS on https://t.co/savSNTKlN1: Sequentially eps fell from $0.05 per share and Sales decreased by -4.484 % from $12 millions. https://t.co/wwiCd5g9q5	neutral
@axelroark You should see the negative divergence on $AMZN... speaking of overstaying your welcome.	negative
$MSFT and $FB have not given any out look yet.. u need to see what they say going forward	neutral
$DIS Earnings tonight 😬	neutral
Godrej Consumer Products Limited #GODREJCP Recommended on 14th May at 566 CMP: 679. Profit of 20% in 28 Trading Day. #Stocktotrade #Stockstowatch #stocks #Nifty #nifty50 #stockmarket #stockstowatch #stockmarketnews #stocks #stockstotrade https://t.co/IWLcaKsL5i	positive
RT @charliebilello: Big tech returns in 2008... $MSFT: -44% $AAPL: -57% $GOOGL: -56% $AMZN: -45% Returns in 2020... $MSFT: +14% $AAPL: -3%…	neutral
RT @jchatterleyCNN: "The hate speech is there because it maximizes engagement," says @Moonalice, an early Zuckerberg advisor. #Facebook has…	negative
Grand Canyon Education Inc $LOPE Short Interest Update https://t.co/E99nrOLrGp #stocks	positive
RT @GretaLWall: #MarketWatch $INTC falls after-hours despite beating Q1 expectations. Intel posted adjusted earnings of $1.45/share vs $1…	positive
$TLSRP #Stocks #StockMarket #Telos reports Q4 EPS on https://t.co/savSNTKlN1: Surge in Sales could not lift company's EPS, in the Q4 reached break-even at $0.00 per share, Sales jumped by 29.174 % to $46.473 MM from the same quarter a year ago. https://t.co/nBCfiBIp8W	positive
Below is my referral code for Trading212 🤑💹 Do you want to get a free stock share worth up to £⁠100? Create a Trading 212 Invest account using this link https://t.co/koQgj5Jyl5 #freetrade #shares #invest #investing #trading #trading212 #free #money #stocks	positive
“Bespoke notes that of the 11 bear markets from 1928 through 1940, 9 of them saw the S&amp;P 500 make a lower low, but since 1940 most bear markets have tended not to see retest” via MarketWatch 5/2 $SPX $SPY $VOO $IVV https://t.co/NfgoJ77k55	negative
eS now at 3007, backtesting vs prior low 3005. Key time. Ricky’s train going at full speed towards targets. Beauty!💆‍♂️ #ES_F $SPX $SPY https://t.co/ZaVJo8RCyf	positive
https://t.co/Xq49xYJpuc #btc no wonder $msft accepts payment in bitcoin	positive
NocTrader Bearish Breakout https://t.co/1V7l4Is0Qo #prorealtime #trading #markets #stockmarket #trader #stocks #investing #money #forex #bitcoin #cryptocurrency #finance #prorealtime	negative
RT @sbwcws: Correction: Apple price target raised to $390 from $320 at Baird, not $380 $AAPL	positive
RT @OptoCMC: 📈10 small-cap values stocks to watch, with @OptionsHawk #stocks #value #Covid_19 #coronavirus https://t.co/30KoewBvUB http…	neutral
$ge brings good things to living, brings good things to life...this has to have some big news on horizon $spy $spx $es_f #sp500 #es_f #spx ..... $uvxy $tvix $vix https://t.co/Pv0bomZryz	positive
RT @WallStSai: $UNH $HUM $CI $ANTM $CNC $MOH $CVS Big uptick in government business is in store for private health plans like Anthem, Cent…	positive
Wave 2 might be in progress. #es_f $spx $spy $vix #sp500 https://t.co/wVShozYIVX	negative
$ES_F Putin Saudi deal could be THE CATALYST to get above 2900 https://t.co/ESjnX5sNjT #Crude $CL_F $SPX $SPY $ES_F https://t.co/A3vMwvAe8v	negative
RT @ChrisDungeon: "Innovation has nothing to do with how many R&amp;D dollars you have. When $AAPL came up with the Mac, IBM was spending at le…	positive
RT @Fxhedgers: FACEBOOK'S ZUCKERBERG WAS REPORTEDLY TALKED OUT OF MAKING MOVES AGAINST TRUMP AS FAR BACK AS 2015 - DJ $FB	negative
@Mahhsonn lots of others. $MU, $DIS, $AAPL, $AXP to name a few	neutral
$PFE #BioNTech #BNT162 #SARSCoV2 #COVID19 #vaccines. $BNTX closing price today.	negative
RT stock_family: https://t.co/gJmA3QYHha $SPY $EEM $GLD $VXX 👁👁 - https://t.co/YWb0YTEzG0 #options #stockmarket #daytrader #stocktrading #stockoptions #news #stocks #OptionsTrading $aapl $spy $amd	neutral
Asia Pacific stocks higher ahead of U.S. jobs report; airline stocks mostly soar. $AMZN $AAPL $AMD $BA $BABA $FB $CRM $DDOG $TGT $GOOGL $ROKU $TSLA $SPX $SPY $TDOC $COST $ZM $GILD $USO $NVDA $ROKU $BYND $NFLX	positive
$HHT up 25% in 2 days #stocks #OnlineClasses $BOXL $LRN https://t.co/4mtdDPCoUh	positive
Available #onhand #stocks of REGULAR #CYTOKIT text me at 09653052991 💥 #pampalaglag #cytotec #cytoteckit #abortion #mifepristone #misoprostol #abortionpills #abortionphilippines #cytotecphilippines #cytokitphilippines 09653052991 :) https://t.co/TRyMKKBdEL	neutral
RT @TheDomino: .@Tesla $TSLA market value just went over $200 billion for the first time ever... Making it worth as much as Disney $DIS or…	positive
Updated fact sheets for #DSVpanalpina &amp; #Össur in Denmark after their Q1 2020 reporting + for #Gabriel after their Q2 2019/2020 reporting. #nobiz #dkbiz #sebiz #aktier #aksjer #OMX #OSEBX #OBX #udbytte #utbytte #stocks #osinko #osakkeet #dividend #dkpol https://t.co/nCnYh4EFCC	neutral
RT @DeItaOne: TESLA'S ELON MUSK CALLS FOR BREAKUP OF AMAZON $AMZN $TSLA	positive
RT @eWhispers: #earnings for the week https://t.co/lObOE0dgsr $AMZN $TSLA $MSFT $AAPL $AMD $BA $FB $LUV $MMM $GE $AAL $UPS $TWTR $PFE $…	neutral
More Retail fall-out. $V $MC =&gt; J.C. Penney explores bankruptcy as hopes for recovery fade, sources say https://t.co/WpZADdoMuc	positive
So long, focus groups. Here’s everything you need to know about the new data that’s directing Hollywood - $viac $cmcsa $dis $nflx $aapl $t $sne $roku $amzn $disca $lgf $twtr $fox $fb $goog $snap $stx $mgm https://t.co/Hpa5PTk37E	positive
Reliance Steel &amp; Aluminum $RS Issues Quarterly Earnings Results https://t.co/PCgkGYPBos #stocks	neutral
Just read a few articles I see some good 🔥🔥🔥 stocks for this upcoming week 📊💻💰💰💰 #stocks #robinhood	positive
More updates for the $SPY trades and comments on the $SPX at 11:32 AM https://t.co/aGpd3sXof2	neutral
RT @frankmottek: Demand it now. Get it now. #MottekOnMoney Special Edition #podcast #Coronaviruscrisis #BearMarket #Oil #stocks #MainStreet…	positive
RT @ReutersBiz: Australia to force Facebook and Google to share advertising revenue with local media firms, becoming one of the first count…	negative
Here's a little something buried in $BAC's Q1 earnings 1/	neutral
RT @ChrisDungeon: "Innovation has nothing to do with how many R&amp;D dollars you have. When $AAPL came up with the Mac, IBM was spending at le…	positive
RT @SethCL: $SPY $SPX if youre not familiar with this pattern, it is typically the most bullish for you Ichimoku cloud sycophants ;-) The e…	positive
RT @NorthmanTrader: Goldman also says the lows are in and have a $SPX 3,000 target.	negative
ES now at 3007, backtesting vs prior low 3005. Key time. Ricky’s train going at full speed towards targets. Beauty!💆‍♂️ #ES_F $SPX $SPY https://t.co/ZaVJo8RCyf	positive
Looking for the best auto stocks to invest in? Check out this hand-curated list of 40 of the top-performing companies in the industry. https://t.co/LSWWsk7YV4 #stocks #investing https://t.co/AY2O26HCnE	positive
$DBMM #Stocks #StockMarket #DigitalBrandMediaAndMarketingGroup releases Q2 EPS on https://t.co/savSNTKlN1: In contrast to the Q1 Sales Tumbled by -49.626 % from $0 millions and from $0.00 per share. https://t.co/ReoSrnrIhx	neutral
ConocoPhillips $COP = 200,000 boepd + Chevron $CVX = 125,000 bpd + Occidental $OXY = 85,000 boepd + Apache $APA said would cut Permian rig counts to zero + Continental $CLR said would reduce production for April and May by 30% https://t.co/pMMSxigjSA	negative
Realogy Holdings Corp $RLGY Short Interest Update https://t.co/KtMrbE05ng #stocks	positive
$NERV down 72%! Overpanic, OVERSOLD!!!📈🍾💸🛒 $AAPL $AMD $AMRN $AAL $BAC $AMZN $MSFT $BA $ABT $TSLA $X $NVDA $GE $DIS $CCL $UBER $DAL $NFLX $FB $T $F $MU $SQ $M $ZM $XOM $GILD $ROKU $UAL $JPM $ABBV $FCX $SNAP $BABA $WFC $RCL $BB $HSBC $LYG $TEVA $C $OXY $JNJ $LYFT $LK $ZM https://t.co/GwNBPlqb3j	negative
2 million Robinhood accounts rammed with OTM call options just evaporated.. $QQQ $SPX	neutral
$AAPL 1-hour view from 4/06 update presented to members at https://t.co/7pgSLh5SPg pullback completed as a flat structure &amp; resumed higher #Elliottwave #Trading #Apple https://t.co/Hryzfh471U	neutral
RT @iflickerman: "All Free" Retail is Back, Amazon $AMZN ready for Chapter 11 🤣🤣🤣 @JuliaLaRoche https://t.co/t4S8BD3REg	positive
RT @AmericanBanking: Jefferies Financial Group Reaffirms “Buy” Rating for Alphabet $GOOG https://t.co/r2A7GeIc6F #stocks	neutral
[ $SPY $QQQ $IWM $SPX $NDX $RUT $AMZN $NFLX $AAPL $MSFT $BA $TSLA Stocks &amp; Option Alert Service https://t.co/ZXTYWWzaA8 ] $IBB to Sell.] =	negative
UnitedHealth Group - $UNH 💰 QUOTE $UNH was UP ⬆ on Tue Jun 02 Closed at 306.31 USD for a 0.12% gain from previous close 📈 📈 📈 📊 ANALYSIS UnitedHealth Group should be nationalized ☭ ☭ ☭	positive
In the last 30 days, broad ETFs have seen huge inflows of money and rebounding from a horrible year.#etf #money #seen #30days #30day #bestday #stocks #markets #flows #economy #economics #recession #bearmarket #bullmarket #investing https://t.co/9KriEjC9Ur	negative
To be #successful in the #StockMarket, you must know the power of #compounding. #Compounding is #possible when you #invest in #stocks of #companies and #hold them for a very long time. Huge #returns can be made by #holding them in the long run. @reliancejio @TheOfficialSBI	positive
Lots of replanting.... $HD https://t.co/NGcHkbT7yo	neutral
$MRK VOLUME AT THIS POINT WOULD INDICATE AND MAKES IT REALISTIC THAT 80$ ! IF YOU HAVE EXTRA $ SAVE A LITTLE BACKFOR YOUR RAINY DAY ! VIX LOWER! GL. MAY THE FORCE BE WITH YOU! ( ; o ))))	neutral
#PrivateDebt #Equities #Stocks $BIOX On the other hand, the company issued capital for more than 50 million dollars during the quarter, through the private placement of a convertible note maturing in 2023 for 42.5 million #dollars, Argentina https://t.co/rNGEMRnduX …	negative
Don't miss our next FREE OPTION TRADE. Sign up for our Daily Free Trades at https://t.co/Jygh6huARA $NVDA $TSLA $GS $REGN $BAC $GOOGL $FB	positive
RT @DKellerCMT: Stocks and bonds in lockstep over the last month with the $SPY to $TLT ratio essentially rangebound, just like the $SPX. W…	positive
RT @moneycontrolcom: ⚡️ “Mornings With MC: Stock Market Updates, Now Serving!” https://t.co/24GpOMIONQ #Stocks #StockMarket #StocksToWatc…	neutral
$SPX If you think price moves lower - you have plenty of time to wait for it to show you it wants to move lower. We're above last weeks high which last I changed was not bearish...Just wait for confirmation	negative
Gold equities present “an island of value against a backdrop of trouble”, Sprott Asset Management senior portfolio manager John Hathaway says. #GOLD #stocks #equities #markets #investing https://t.co/rlTN3s2WQl	positive
Bloomberg: Investors Are Spending Fresh Billions #Hedging Market Mania. $VIX $SPY $SPX $ES_F https://t.co/98BuOZAVdJ via @GoogleNews	positive
@masterlongevity @Miljenkoz @zipjet $pfe released pre-print and didn’t wait for peer-review. $mrna and NIAID are releasing in peer-reviewed journal. Big difference and requires a more complete set of data to get published. Will be first peer-reviewed data we get to look at	neutral
#Options Flow Grid Update $CAT #OptionsTrading Caterpillar Shares🔻1.57% to $127.4 #OptionsFlow #optiontrading #stocks #stock #StockMarket #investing #Investment https://t.co/Jj64hrH1R3 https://t.co/Efxh5QF5yy https://t.co/RhDjz9fN13	neutral
$DIS crushed the index in early 2010s out of a recession, willing to bet it does the same coming out of this recession. https://t.co/wPlcuqWjY3	negative
$AAPL - Apple's Handwriting On The Wall For Intel And AMD. https://t.co/wGimZoIpp4 - 1,324% profits - 1/2 in $$ - last 14 years - buy #AIM #investing book, get free newsltr &amp; learn how - https://t.co/CzS5PXZWco - https://t.co/IHjBPabNd1 - like $AAPL	positive
Amidst the repercussions of the #coronavirus // #COVID19 - get informed, be #educated &amp; stay ahead of the crowd. SUBSCRIBE TODAY: https://t.co/qBGEqptFRE #microcaps #stocks #microcapstocks #stockmarket https://t.co/dXV6LvMnZc	neutral
RT @LiveSquawk: Intel Has Been Reiterated As A Top Pick Stock At BAML With A Price Target Of $70 $INTC	positive
The big story today? $AMZN is going down after completing the ending diagonal anticipated a month ago. https://t.co/JRX6COtXF1 #Elliottwave $XLC $SPX $NDX https://t.co/q8YLClRUqF	negative
RT @SJosephBurns: Earnings season begins: https://t.co/eDYHYwrKxe $JPM $PEP $NFLX $WFC $DAL $DPZ $C $BAC $UNH $JNJ $FAST $GS $ABT $FRC $…	neutral
RT @stealthebasis: Is it #capitalism when one person can make a comment on tv and move markets for just about every asset MASSIVELY in eith…	positive
RT @NorthmanTrader: You may remember the original chart from the video.... $SPX $VIX updated https://t.co/QW2Vdxd3WL	neutral
Gartner Inc $IT Sees Large Decline in Short Interest https://t.co/ryBGQzbylC #stocks	negative
@chigrl SELL EVERYTHING AND BUY $AMZN	neutral
RT @realJosephRich: Tim Cook furiously trying to save the NASDAQ by buying back $AAPL stock funded by debt bought by the Fed is the lowest…	negative
Currently holding: $QQQ 1/15/2021 $310C $T 1/21/22 $5C I left a lot of money on the table last week but overall I’m happy with the continued growth. My account is currently up 51% in three weeks. Excited for next week!	positive
RT @unusualOA: Date : 06/19/2020 Time : 09:31 AM Ticker : $NUAN Exp : 07/17/20 Strike :25 Spot : 24.10 Contracts : 283 @ 0.63 Premium : $…	neutral
$ES - 2nd BIG WIN of the day Short ES at 3167 Exit = 3150 (partial) Profit = 17 ES pts = $850 #algotrade #eosalgotrade $SPX $SPY $AMZN $AAPL $AMD $FB $SHOP $BYND $NVDA $GOOGL $MSFT $TSLA $BA $CMG $INTC $NFLX $JPM $BAC $YM $YM_F $NQ $NQ_F $ES $ES_F $GC $GLD $QQQ https://t.co/RrLAkUQXpU	positive
RT @UPBOptionMil: Some of the largest open interest increases from this past weeks trading action 6.1 - 6.5 $HTZ $ZNGA $SNAP $BAC $MS $I…	positive
RT @dynamicvol: Market reminds me of the "eye of the storm" feel we had after Bear Stearns in 2008. In the two months after Bear rescue,…	negative
$AAPL #patent 10,707,699 Interphase transformer based rectifier for wireless power transfer #tech #IP #research https://t.co/DIr8TObqln https://t.co/y3Y1OjiK01	neutral
@Garrett46881741 Not much pullback from entry from 2700 to 2720 in next session unless surprise negative news. Longer term, yes pullback from current 2767 expected. We are not nearly close to be out of woods with Corona-virus effect. Earnings coming up is key #es_f $spx $spy #options #futures	negative
https://t.co/npsA48b4gi 3 months 10 bucks offer for 4 th July Week !! $INTC, $MRNA, $NFLX, $RAD to Calls_Bullish_Stock ($SL 20 % ).] =	neutral
$AAPL - Shipment estimates cut for Apple's 5G iPhones - Digitimes https://t.co/ep9MWtz3ZL	negative
Don't get perplexed with the pullback! The #SP500 is testing the TL4R trendline resistance and the 2,862 support level. The uptrend is fully intact. Keep an eye on a BULLISH 50-day/600-day EMA crossover. This is an opinion. $SPY $SPX #DJIA $DIA #DOW #NASDAQ $VIX https://t.co/V5ddDfV6yn	positive
RT @Sarge986: The Virus Remains in Control, Unrealistic V-Shaped Recovery, Trading 2 Stocks $GILD $MYL $MRNA $INO $JNJ $JPM $WFC $AMD $NVDA…	neutral
RT @Lakshmi_888: Top left hand corner contains timeframe for all my charts:) 15min t/f so looking at days to a week...IF it plays out...…	positive
RT @hannanmetals: Tune in on Tues July 7th for @JayTaylorMedia 's Turning Hard Times into Good Times - @hannanmetals CEO Mike Hudson is a…	positive
RT @breakingoptions: $ABT $BAC $MS #joblessclaims Have a bunch of traders asking me where I think the market will open We have all of…	neutral
$SPY barchart Thurs - All US Exchanges - 52-Week New Highs = 168 New Lows = 10 Humm…. -- Every stock is going up :) $ES_F $NQ_F $SPY $SPX $QQQ $IWM #Elliottwave #trading #futures #cme #mes_f #markets $spy #aapl	neutral
$ALPP $SKDI $SNDD $GRNF $SHMP $CLWD $IPIX Is Alpine 4 Technologies (OTCMKTS:ALPP) A Buy Right Now? #news #pennystocks #alpine4 #alpp #stocks #stockmarket #pennystockpicks #pennystockinvesting https://t.co/2bOHoPNjnT	positive
@GreenTeamToad @Stockcratez Thanks for sharing AI is the future and Google and Fidelity deals are MASSIVE! $GOOG $GOOGL $FIS $SSFT	positive
RT @exis10tial: At some point, airlines are going to make sense to allocate into.. I don’t claim to know that specific level, but what I d…	neutral
Interesting read on the effects of USO's restructuring as well as increases to margin requirements which happened last week. #stocks #StockMarket #trading #investing #WallStreet #bolsa #BolsaMx #Nifty #sensex https://t.co/GTDQdVsBPq https://t.co/ignEhnahGs	positive
Weekly Newsletter going out Later today! Outlook for the Market, FAANG &amp; Individual names (big-smallcap) for this week w/ equity/options plays $SPY $AAPL $AMZN $NFLX $FB etc.. Free for Members Link to Sign Up for The Month: https://t.co/Zp4xc5dDO1	positive
Short Interest in Utah Medical Products, Inc. $UTMD Increases By 20.7% https://t.co/fvFLHPeXae #stocks	positive
If You're Getting a Second Stimulus Check, It'll Probably Happen by Aug. 8 @themotleyfool #stocks https://t.co/XGjKWQ9KFr	neutral
$idex $izea $lk $fb $ibio $dow $spy $tsla $nkla $dkng $aapl $aal $zom $vxrt $ino $shop $aytu $ozsc $tops $ktov $ba $nvda $msft $spy $gnus $aezs $dloc We alerted $SOLO at $2.5 RAN TO $6.5 700 (200% GAIN!) Daily Alerts $15 ONE TIME FEE BEAT THAT 👇 👇 https://t.co/33NfOdjf0i	positive
RT @TriggerTrades: Levels 📊 Notes 📝 Trends 📈 $SPY $SPX #ES_F ⚠️ Massive sell-off today after a false breakout ❌ attempt⚠️ Minuette wav…	neutral
RT @bti_trading: $RIOT $HTGM $BBI Latest signals given by our algorithm on these stocks on our 1-hour charts. Join the winning team BTI Mag…	neutral
STOCKS RECOMMENDED BY US ON 11th MAY 2020. Vodafone Idea Ltd #VodafoneIdea #Idea #Stocktotrade #Stockstowatch #Stocks #StocksInNews #TopGainer #Stocks #stockmarket #stockinfocus #stockmarketnews #StockTrading https://t.co/L41nqnvqvZ https://t.co/LAjEowOgZL	positive
European Stocks push higher as Trade War Threats recede 👌 https://t.co/IybGWMAHHv 👆 #trading #tradingview #forex #eurusd #investing #investor #entrepreneur #stocks #forexlifestyle #wallstreet #forexsignals #business #forextrader #technicalanalysis #millionaire #billionaire https://t.co/5rDzdSegyq	negative
Did $PFE just say they could enroll 30K in the trial in four weeks?	neutral
RT @PowerLunch: NJ Governor Phil Murphy adding @Merck CEO Ken Frazier to a commission on restarting the economy. Here's what he said about…	neutral
RT @DeItaOne: COVID-19 VACCINE FROM PFIZER AND BIONTECH SHOWS POSITIVE RESULTS - STAT $PFE	positive
RT @moneycontrolcom: #MarketsWithMC | Experts say that these #stocks are likely to be wealth creators in the next 2-3 years #StockMarket…	positive
@elerianm I told. SP500 is a great opportunity to get 2200 points. https://t.co/AutMjzbBLq	positive
RT @stonksrus: $twtr $msft $amzn $qqq $fb $nflx $xspa $googl $mrna $penn $nvda $aapl $spy $spx #Futures $bynd $mark $xspa What it is ain't…	neutral
RT @OphirGottlieb: $AAPL Apple cuts iPhone prices in China to keep momentum going as economy continues to reopen https://t.co/Dc3ug1II8N	negative
$FB facebook still hold its 220 support plus whatsapp payment start in Brazil.i think this is bullish for fb https://t.co/0u19SoHjCm	positive
RT @dannyvena: #Teladoc's Preliminary Results Point to a Blockbuster First Quarter @themotleyfool #stocks #telemedicine #telehealth #virtua…	positive
Went through $JPM $GS $WFC $BAC earnings transcripts, it seems like consumer side loans are pretty shaky. In terms of tier 1 ratio, $PNC and $BAC are a bit low.	positive
Boohoo, Manchester fashion giant, sees revenue soar to £1.2bn as profit tops £92m – Northern Financial Review ⁦@boohoo⁩ ⁦@NastyGal⁩ ⁦@OfficialPLT⁩ ⁦@BaillieGifford⁩ ⁦@SLA_plc⁩ ⁦@ASInvestments⁩ ⁦@TEMIT⁩ #stocks https://t.co/FmbeQWDlsr	positive
$msft The gift that keeps on giving.	positive
Will start Live streaming charts every Friday morning on the opening bell. #Bitcoin , #stocks all of that	neutral
RT @the_chart_life: The 'Wall of Worry' is losing some bricks. Great for society, but maybe not for stocks? The "good news selloff" thesis,…	positive
Kraft Heinz - Daily #SP500 Short Term: Range $31 / $34. Medium Term: Large range $28 / $34. Long Term: Large range $20 / $32. Short Term support $31 must hold the line to prevent correction to $29, $28 and $27.	positive
Forterra Group revenue declined 39% for the five months to 31 May 2020 - https://t.co/BYQ9BHGWfR - $FORT #Trading #Shares #Stocks #Ratings https://t.co/SdCt01hSZj	negative
While the 4.8 million jobs added in June is a strong number, the U.S. economy is still at more than 10 million net jobs lost during the coronavirus outbreak. #stocks #markets #economy #investing #financialservices #jobs https://t.co/7LTYciJyW9	positive
RT @JimScalpert: $SPX / $SPY 💯% confirmed Squirrel pattern. 🐿️🐿️🐿️🐿️🐿️🐿️🐿️🥜🌰🥜🌰🥜🌰 https://t.co/ot7FNNT21s	neutral
How deep would $SPX have to dump before America begged for #NIRP? https://t.co/A4duhI6hjd	negative
RT @ETFProfessor: While long-term government yields continue to fall in the United States, yields in other heavily COVID-affected areas hav…	positive
JPMorgan Chase Q2 EPS $1.38 Beats $1.04 Estimate, Sales $33.00B Beat $30.29B Estimate $JPM	neutral
Investors Bancorp $ISBC Scheduled to Post Earnings on Wednesday https://t.co/QqU73xojVY #stocks	neutral
RT @DisturbedDendro: ALERT! Two-year #postdoc in #Calgary #Alberta focused on assessment and modelling of #OldGrowth #forests of above- and…	neutral
Peoples Financial Services CORP. Has $3.29 Million Stock Holdings in Pfizer $PFE https://t.co/FBLtEZgK7i	neutral
RT @Sector_Reports: Changes in Institutional Ownership Signals To Bullish US Stocks: $SLS $VTVT $DUOT https://t.co/EUyMBFseV7 #NASDAQ #NYSE…	positive
Shannon referred you so you get a #freestock. Claim your stock now without #investing money first. Win a stock like Netflix $NFLX, Apple $AAPL, Microsoft $MSFT, or Facebook $FB. Sign up and join #Robinhood using my link https://t.co/9Vp20Q8qKz	positive
Weebles Wobble but they Don't Fall Down $FXE $ACWI $FXB $UUP $SPX $FXA $FXC $FXY https://t.co/LEIAtCoFoH	neutral
RT @247WallSt: Tuesday Top Analyst Upgrades and Downgrades Part 2: $HUM $INTC $KGC $LRCX $MU $MOH $MNTA $NFLX $NEOP $NVDA $QCOM $PETQ $SCCO…	negative
Mastercard update on switched transactions and volume $MA https://t.co/p75eJNWAab	neutral
Concho Resources Inc $CXO Sees Significant Decrease in Short Interest https://t.co/9hQH7cRpix #stocks	negative
RT @Lakshmi_888: #Harmonics #Charts #trading $SPX #SPX #ES_F $ES $ES_F $SPY $DOW #DOW $RTY $RUT #DAX #FTSE $NQ #NQ https://t.co/umuS8WOIKE	neutral
Intraday statistics with historical direction for 14 different instruments. #forextrading #DAX #SP500 #DJIA #natgas #Brent #crude #WTI #ftse100 #nikkei #GOLD #NASDAQ100 #EURUSD #Statistics #investments #stocks #trading #StockMarket #commodity #Commodities #Futures https://t.co/pF6KzoQfLQ	negative
$MSFT Bearish Engulfing Daily appearances since 2010: 85 Close 5 days later ±: Avg: 0.79 SD: 1.84 Worst: -3.78 Best: 6.78 10 days later: Avg: 1.32 SD: 3.23 Worst: -4.94 Best: 18.85 30 days later: Avg: 2.24 SD: 5.63 Worst: -14.42 Best: 31.26	negative
RT @TicTocTick: 2871 target 🎯 met A 50 point zipper If my work is appreciated, give me ff, a retweet or ur comments so I can reach retail…	neutral
$AZZ - AZZ Inc. 2021 Q1 - Results - Earnings Call Presentation. https://t.co/CnXPf3OKtO #economy #markets #stocks	neutral
#Stocks by Rockers. Rush, lyrics by Peart - Lessons taught but never learned. All around us anger burns. Guide the future by the past. Long ago the mold was cast. #knowyourlevels #makeitrain #patience $DIA $SPX $SPY $QQQ $IWM $TSLA $FB $AAPL $AMZN $NVDA $NFLX $GOOG #FANG #BANG	negative
RT @SharpStreetCap: And just like most of the Nasdaq overvalued Stocks always comeback to reality $NFLX $AMZN $AAPL $FB $NVDA	negative
Tracking well to May 9 Plan - we slaughtered the move to 127-130 1st target - deeper than expected retrace on #C19 fear phase II - next stop - rally to 140 on #Truth #Mando is killing #C19 $DIS $SPY $QQQ https://t.co/9egpP0Ys3r	negative
RT @TriggerTrades: $SPX Analysis in Under 2 Minutes! If I should do more of these Like ❤️+ RT 🔄 so I know $SPY $ES_F https://t.co/TznoR0G…	neutral
Banks always make money $JPM	positive
@TheDadInvestor Only one $MSFT	neutral
$spy $gspc $aapl $nflx $goog $tsla COVID-19 case tally: 3.97 million cases, 275,527 deaths https://t.co/GvKAPtnitZ	neutral
Goldman Sachs Group $GS Price Target Raised to $192.00 at Morgan Stanley https://t.co/MOaaXgYJC4 #stocks	positive
RT @newsinvesting: #Stocks - U.S. #Futures Higher; More Stimulus on Way - https://t.co/reTfCYJjmz	positive
$BLPH jumped 430% on Friday. The next stock we see that might have triple-digit potential is $NOVN $AYTU $INO $OPK $IBIO $NNVC $MRNA $GILD $AMRN #stocks #biotech #coronavirus #covid19 #pennystocks #news #novn #blph https://t.co/FevkshNiqP	positive
RT @AdamMancini4: Excellent follow through from yesterdays $SPX setup and we hit the 2830-2850 first target. Bears have a shot here. The re…	negative
RT @OptionGrail: Added to $DKS chart setup still looks good for continuation $TGT $LOW $HD	positive
So my point here isn’t to approve or disapprove, but federal reserve is NOT buying bonds from $AAPL - i.e it’s not providing debt financing - $AAPl is one of 794 firms (that run a gamut) whose existing debt the fed is purchasing (frankly not that much of btw) in secondary market. https://t.co/QgRIS7UTHp	negative
RT @FxWestwater: S&amp;P 500 Rallies as Key Insiders Dump Stock, Traders Add Shorts - @DailyFX $SPX $SPY https://t.co/LyrdXSMNWM https://t…	negative
$SPX earnings estimates by analysts for next 12 months (Y0) only project a 4.3% drop. https://t.co/uJXQhSvVBM	negative
@DIALWEALTH_IN @nimeshscnbc @Nigel__DSouza @ekta_batra @latha_venkatesh @kothariabhishek @blitzkreigm @dmuthuk @SJosephBurns From @real Donald Trump ✌️😁 #stocks #finance	neutral
RT @Northst18363337: Silver big picture, using a line chart to reduce 'noise' #gold #silver #preciousmetals #fintwit #GDX #HUI #GDXJ #finan…	neutral
RT @RampCapitalLLC: Imagine not being long into $AMZN earnings https://t.co/R5f5vGVXqS	positive
$TROW T. Rowe Price #Options #maxpain Chart, Open Interest Chart Update #OptionsTrading #OptionsFlow #optionstrade #optiontrading #stocks #stock #StockMarket #Investment #investing #invest #investor #investors #UOA https://t.co/B7BWRcEdMH https://t.co/o91lJzZK3X https://t.co/CuidboglCX	positive
100% measured move down possible which happens around the yesterday's low and this is why I think it's possible $SPY $SPX $ES_F https://t.co/iwFIGZLO6h	negative
#MarketUpdate 📊 (May 6th) Tomorrow we have a Bank of England #interestrate decision and Friday's #NFP numbers are expected to be record-breaking. We review the #SP500, Silver and #NZDJPY from Monday and take a new look and #SGDJPY. https://t.co/eOXWxo8we6	neutral
RT @ExactOptionPick: Don't miss our next FREE OPTION TRADE. Sign up for our Daily Free Trades at https://t.co/etq7XEbHPQ $NVDA $TSLA $GS $…	neutral
RT @james_carter89: Here are my top stocks in my portfolio: $NOW $OKTA $PTON $SHOP $TSLA $TTD $ZS $AAPL $FSLY $MSFT $TWLO	positive
RT @moneycontrolcom: #MarketsWithMC | Good days ahead for Indian chemicals industry; experts bet on these 10 stocks 👇✍️ #Stocks #StocksToW…	positive
BlackRock Investment Management (UK) Limited short position in CARNIVAL PLC down -0.30% to 0.63% #CCL $CCL #LSE #StockMarket #Stocks #Shares #Business #Markets #Trading #News #Investing #ShortSqueeze https://t.co/vM411LdLkR	negative
Getting close to BTFD event, maybe next week, $spx https://t.co/tgvf8AI4Ki	neutral
.@Jefferies it looks like your analyst Brent Thill believes democracy still has some life left to be beaten out of by $FB.	negative
RT @aaaamhim: $NE ARTICLE JUST OUT! STOP SLEEPING!💸📈 $SPY $SPX $QQQ $ES_F $NQ_F $RTY_F $ZB_F $GC_F $NDX $RUT $AAPL $NFLX $AMZN $TSLA $FB $M…	negative
All today was about $amzn imo It opened just above my 2909 and first pullback was 2848 then 56 I do have high hopes for $amzn 3117 Those suits who gave $amzn a 3200 3333 rating were nuts but they got it #es_f $spx $spy https://t.co/T8qJog3UPz	positive
RT @LanceRoberts: Great point from @SoberLook this morning. Belief is increases in #M2 will support ongoing equity rally. Maybe not. A sou…	positive
$DIS Welp... https://t.co/i723H9yeE7	neutral
RT @TicTocTick: Trade plan July 1: 1. Look for shorts 🩳 tight risk around 3110-3115 for a move down into 3,000 2. Now 3086 3. If ON acti…	negative
Try our Option Swing Trading service built for individuals who want to trade around their full-time careers. Take a free 10-day trail, No Credit Card https://t.co/9SEbatKhcS $AAPL $TSLA $NFLX $ROKU	neutral
RT @BrandonVanZee: 06/25/20 - View today's #MarketOutlook from @Market_Scholars https://t.co/Ol3hj2Jbza Mentioned: $SPY $IWM $DIA $QQQ $S…	neutral
RT @williamoneilco: "If you miss a stock's initial breakout from a cup with handle, you should keep your eye on it. In time, it may form a…	negative
RT @AdamMancini4: Happy July 4th weekend! For a month, $SPX built a triangle with 3030 support &amp; 3190 resistance. Explosive move when it br…	positive
Amazon shares rose past $3,000 for the first time while Tesla extended its five-day rally to over 40%. $AMZN $TSLA #stockmarkets	positive
RT @jenny_hegel: Find great deals on Sale Electronics at Kohl's today! #tech #technology #facebook #stocks #apple #company #business #game…	positive
Will short a blow off top with volume, not before now. $spx	negative
already in $AAPL pulled profit!	positive
Showtime! Chief &amp; @fjfahey are underway. John Flanagan joins us @ 6:35am CT, David Andalman of https://t.co/QIsS7Tbt1E @ 7:35. Stream us LIVE today and every weekday morning, 6-8am CT on https://t.co/6IvBdicpPw. #stocks #markets #covid19	neutral
RT @invest_steady: @sharif_ny The assets make the company more valuable than its current share price. They’re a perfect take out target for…	positive
RT @Nick86294519: @apollotradingsd Aside from my in depth analysis on $C and $JPM that I posted. They got beat down 40% bcz market assumed…	negative
RT @stephenpallotta: $tsla stock doesn't have much more growth potential, it's hit the ceiling..... or has it.......... Check out $aapl an…	negative
@semodough $DIS would cost over $200 B. Actually, it is likely that the cash is in wrong places. They have consistently been borrowing to fund dividends	negative
RT @theponzifactor: 📺 Recent interview on @Renegade_Inc Real [#economic] growth should not be measured by how much a company sells. It sho…	neutral
RT @Northst18363337: Gold and especially silver could be about to experience one hell of a spike. Stay calm if it does and be ready to take…	negative
@dalminium @Skelrad @KeithMcCullough I am not a trader but when I saw $sfm for a long looked into that and will be holding that one for a while, nice to see $JPM target raised this afternoon. https://t.co/ThZElK1bWd	positive
RT @CheddarFlow: Some top opening order flow we caught today $AMZN $IWM $TSLA #stocks #options #optionsflow https://t.co/0DykzHmopc	positive
$BMTC - Bryn Mawr Bank Corporation 2020 Q1 - Results - Earnings Call Presentation. https://t.co/KzhiPOj6ld #markets #stocks #stockmarket	neutral
Ramco systems is a falling knife⬇️⬇️⬇️ Will go back to where bigbull Kedia entered it.. Next level for buying is 70-75. #Stock2020 #stockmarkets #stocks	positive
RT @ej23ny: $ATNM phase 3 @ 50% enrollment results 82% failure for the primary endpoint in the control arm vs 80% success of lomab -B. Very…	positive
@amazon $AMZN stock is gonna tank tomorrow	positive
Can't play these futures tonight Every bones in my body says buy but I know the right thing to do is sell. Therefore can't do it $SPX /ES	negative
Due to widespread #bankruptcy #financialobligations #banks @jpmorgan @WellsFargo @BHHSRealEstate @BBCBerkshire @GoldmanSachs @Chase @Mastercard @visa $AMZN $BABA $F $FB $GM $NFLX $MSFT $NVDA $CHK $RRC $XOM $OIL $UNG #Oil @cnnbrk @CNN @FOXLA	negative
RT @ISABELNET_SA: 🇺🇸 S&amp;P 500 Chart suggesting that the current market rally is not driven by fundamentals, but by the Federal Reserve's li…	neutral
RT @ShockExchange: Ignore Joe Burrow. #Opioid Deal Makes Teva's Kare Schultz The Goat https://t.co/svwQeUe70R $TEVA $MNK $ENDP $JNJ #opioid…	negative
#Dow E-mini #Futures #YM_F ⬆️177 Pts (0.68%) to 26,154. Check Advanced Futures Chart w/ Auto #Fibonacci Lines, Support &amp; Resistance, Futures Money Flow Chart &amp; Alert, Futures VWAP Chart #futurestrading #future #Investment #investing #stocks #StockMarket https://t.co/mzotIguudf https://t.co/WPSuzBV0B2	positive
$AAPL took some 1/2 at 1.0. https://t.co/KnPX23IWoF	neutral
RT @barbara_doran1: Back on CNBC tomorrow (Tuesday, May 5) on Market Zone from 3:45-4:15pm EST to talk about where I think the stock market…	neutral
Not all toilet papers are created equal... #tushy #investing #investor #assets #dividends #fiat $KOL $spx $dji #silver $BTC $ETH $ETC $TSLA #gold #macroeconomics #bitcoin	neutral
IMO $GOOG guide is going to be terrible on the call https://t.co/td2Bz0STaq	negative
04/21/2020 Market Recap $SPY $SPX $ES_F https://t.co/qVwuAcsxbV	neutral
ya ya $Spx 3,400, spx 2,900, spx 2,600. i can call numbers too. crash this crash that, truth is, FEDS were able to get S&amp;P 500 to 3,100 without spending more than 5% of their intended use. just think what they can do if they really wanted to. stop fighting, follow fed + price.	negative
RT @danielnewmanUV: New @SixFivePodcast is live with @PatrickMoorhead and I. This week we dive into: 1. @Microsoft BUILD 2. @HPE #Earnings…	neutral
RT @ManiaMarkets: Perf YTD: Gold miner ETF beats Tech faves &amp; Apple in 2020 $QQQ 20.70% $AAPL 26.92% $GDX 28.86% $PAAS 27.14% $AUY 40%	neutral
RT @Coolfundoo: STAR🌟Stocks &amp; My Screening Techniques Data as of 12Jul2020 10 &amp; 9🌟Stocks @Coolfundoo Screeners Techniques = Screener Na…	neutral
RT @BullPennyTrader: $VISL should be interesting tomorrow. Anyone else swinging it? 9 more days to go for NASDAQ compliance. I think this j…	positive
Mercury Time-Price Analytics: Daily Algo Bull-Bear Pivots 7-8-20 ES $3144.18 NQ $10556 $SPY $314.45 $QQQ $257.55 $AAPL $374.43 $MSFT $209.81 $JPM $92.89 $XLF $23.00 30 YR Bond 178'30 Crude $40.52 https://t.co/QSS6ySABdL $SPX #StockMarket #DayTrading #ES_F #stocks #crude #bonds	neutral
@FizeekMoney yup exactly. $SPX is going into the Abyss, it’s just a matter of when. $BTC is stuck between an organic bullish market cycle &amp; global headwinds from dwindling $USD liquidity in the remnants of the Corporate Globalist regime. take a look at $HYG !	positive
RT @BioStocks: $MRK $AZN LYNPARZA Receives Positive Opinion from EU CHMP for First-Line Maintenance Treatment of Patients with Germline BRC…	positive
@cnbc #stocks it's simple Cramer stocks sold off because people wanted liquidity then when the coast was clear they bought back in. And those of us lower income where able to buy in because of covid.	positive
Soft Start Anticipated For Indonesia Stock Market https://t.co/Xw5Z8auWPC #stocks #trading #rttnews https://t.co/IgMnMqyHwA	neutral
RT @MauriceOnTW: $RHHBY ($ONCE) Updated Data on SPK-8011 from Phase 1/2 Clinical Trial in Hemophilia A at #ISTH2020 https://t.co/HuRwNWktD…	neutral
$NAKD $NIO $MIST $IDEX There #WARZONESCRIPT a top favorite among our clients. A ribbon wil populate and identify some of the most important SUPPORT/RESISTANCE zones Visit us at https://t.co/A33UxhgoRb #trading #stocks $IZEA $DGLY $NIO $NAKD $IDEX $IMRN $MIST $SPY $TVIX $SOLO https://t.co/tLwcfaXU7i	positive
RT @CNBCClosingBell: MICROSOFT EARNINGS: - Revs. Beat $35.02B vs. $33.66B Est. - EPS Beats $1.40 vs. $1.26 Est. $MSFT https://t.co/n7C7ZIRP…	neutral
I was long $SPX for a bounce but was this last 2 hours . I’m out . Peace https://t.co/xYOY1fsfA7	positive
$JPM: New SEC Filing for $JPM: Form 424B2 (No. 0001615774-20-007789): https://t.co/AaOQbVGVQb	neutral
Kind of cool to have one full share of Honda' stock. Its a small step but one I hope to build on long term with my portfolio. #stocks	positive
$SPY $SPX Nice breakout! https://t.co/z6CbFtZwZi	positive
Date : 07/07/2020 Time : 12:42 PM Ticker : $BAC Exp : 07/17/20 Strike :23 Spot : 23.05 Contracts : 1000 @ 0.80 Premium : $80K Type : SWEEP #trading #inversion #Nasdaq #COVID19 #stocks #Fed $ROKU $AMZN $APPLE $SQ $SPY	neutral
Buy the Dip replaced with plain old FOMO - pick faves and set stops. Tech still rules to day. Dow up one percent but Nasdaq still the tell &amp; up 1.25%. FAANG &amp; Friends intra-sector rotation= All in the green as $SQ leads (rebound off selloff last week) while $MSFT lags the group	positive
For all those who also invest long term, put away some shares of $JNJ. I promise you this will bring rewards by the end of the year. $MNRA strong hold as well but get out of $INO soon as it will peak, and they will lose the race	positive
RT @Lakshmi_888: #SPX $SPX #ES_F #Dow $NQ #NQ #NDX $RUT #DAX #FTSE $ES_F $QQQ $Dow Kp an eye on retracement **possibly** to 2740-ish $SPX…	neutral
Awesome trade on $INO and $BAC!	positive
RT @stoxline: #AMEX Top 100 Volume Leaders #SP500 SPDR ( $SPY) Strong Buy #Zomedica Pharmaceuticals ( $ZOM) Sell S&amp;P 500 Financials #SPDR (…	positive
BOOKED @ 24010 Follow me for the Real Time Live trading signals #forexsignal #forexsignals #trading #forextrading #GBPCAD #daytrader #stocks #stockmarket #BitcoinCash #EURJPY #EURAUD #GBPCHF #Apple #coronavirus #COVID19	neutral
$SPY Long: Lost on this one. Today is Friday, I could have not taken any trade. -$1000 on $SPX calls &amp; -$460 on /MES. #TW0E #DayTrading #SPY https://t.co/tTWppHLY9N https://t.co/hHzQadJ6NE	negative
Did you know that required minimum distributions from an IRA or 401(k) account have been suspended for 2020? Retirement savers won’t be forced to make withdrawals from their plans in the midst of a bear market. #stocks #markets @StegentEquity Stegent Equity Advisors, Inc https://t.co/RDBcYgEP42	negative
RT @elerianm: Thanks. With #Ford downgraded to junk on March 25, this fuels the debate on whether/how the #Fed should buy #HighYield #bonds…	negative
RT @Sandro_power: This market is tough but we will wait for confirmation $AAPL has not been able to confirm my rules a good reason why this…	positive
$AMD $NVDA $TSLA $NDX $SPY $AAPL $BABA $NFLX $ROKU $BA $COST $MCD $WMT $FB $VIX $ES $DKNG $ADBE Click here to get instant updates and free trials. Join the link to https://t.co/USlOOzZoZk https://t.co/IOv4bn5M45	neutral
Just found the narrative that killed today's rally. Thaaaaanks Callie..... #stocks #lol https://t.co/dh0XXSgTlt	positive
Martin Midstream Partners L.P. $MMLP to Issue Quarterly Dividend of $0.06 https://t.co/PdpUHiP8RV #stocks	neutral
RT @dhovekamp42: @THETECHNICIAN84 $ADAP IPO $17 PT will be easy to do should $GSK / $MRK report favourable first data at #ASCO2020 from its…	positive
“Gratitude leads to optimism, and a positive attitude is 90% of the game.” — @LindaRaschke #stocks	positive
RT @TriggerTrades: Levels 📊 Notes 📝 Trends 📈 $SPY $SPX #ES_F Last post, I projected a bounce early in the week 📅 to 3132 to complete wave…	neutral
$CLF #Cleveland-Cliffs Cleveland-Cliffs Inc.: | https://t.co/2DpXAqiwIo #equity #stocks https://t.co/POyEQOttrS	neutral
RT @FOREXcom: Market wrap: - US equities edged higher on the day: $DJIA +0.4%, $SPX +0.4% - #Gold and #WTI Crude #Oil were both essentially…	negative
$denn We have detected a noticeable rise in the Zeitgeist for Denny's Corporation at https://t.co/olLXHuVP6n Visit DataSwarm Markets for more information #STOCKS #NASDAQ DataSwarm ref: 101269	positive
RT @ecommerceshares: $SNAP In the last nine quarters (2018-YTD), Snap has issued 260m shares to employees (22%). That’s $4.2bn in new share…	positive
RT @FrankieSoo_Logo: Abstract Bull Logo for Sale https://t.co/m4e85RYQ2s #abstract #animal #bull #beef #brand #capital #design #dynamic #e…	positive
@RichLightShed $GOOG needs to buy $ROKU - get off their wallet and do something useful.	positive
Big names ditching $fb doesn't matter, out of control employment doesn't matter, fraud doesn't matter, profitability doesn't matter, people dying doesn't matter. Nothing matters, stocks only go up, just buy buy buy!!! $spy	positive
the divergence trade played out as expected.#stockmarket #stocks #investing #trading #investment #finance #wallstreet #daytrader #darkpool #blocktrades https://t.co/8fOfHPWRgj	positive
RT @CNBC: Buy Disney shares with 'both hands' if it reaches this key level: Miller Tabak $DIS (via @TradingNation) https://t.co/TcRit7KFWx	positive
$SPX April 30th high taken out	positive
Stocks Climb on Positive Economic Data #SP500 #index #MarketScreener https://t.co/FbcYeobWIk https://t.co/e7SIStqvGt	positive
RT @saxena_puru: 2) Both of the prior two *secular bear-markets* lasted for 13-14 years (1968-1982 and 2000-2013) and both of the prior two…	neutral
https://t.co/IQibAx8Lo8 #sell balmer lawrie &amp; co. ltd. at Rs.101.80 #BALMLAWRIE #FinTech #MachineLearning #stocks #trading #India #charts #ML #AI https://t.co/DSvh69YnLZ	neutral
Canada Goose Holdings Inc $GOOS Given Consensus Rating of “Buy” by Brokerages https://t.co/x5LeZOznur #stocks	positive
RT @MacroCharts: U.S. Economic Uncertainty Index. History being made: highest spike of all time (35 years of data). Prior historic spikes…	positive
RT @SeekingAlpha: $AAPL $ADS $ALGN - Stocks To Watch: Spotlight On EVs, Shipping And Hertz. https://t.co/ugbX7XfrRV #stockmarket #economy #…	neutral
$UVXY making a comeback and $AAPL dumping up 3 points in that now https://t.co/sgB7kbi6D1	negative
Lumentum Holdings, Inc (LITE) is the #MarketMover of the day https://t.co/IsZ7NDrWyR $LITE #Stocks https://t.co/3eVTg4jy32	positive
Apache Co. $APA Given Consensus Rating of “Hold” by Analysts https://t.co/ahyp2cxFKb #stocks	neutral
RT @Investingcom: *AMAZON SHARES RALLY TO HIGHEST LEVEL ON RECORD, LAST UP 2.1% AT $2,656 *AMAZON SHARES ARE UP ALMOST 35% IN 2020 $AMZN…	positive
RT @AlertTrade: #algotrading #algotrade $SPX $SPY $AMZN $AAPL $FB $SHOP $NVDA $GOOGL $PAYX $ASPU $SMPL $WBA $BBBY $LEVI $SGH $MSM $HELE $AZ…	neutral
RT @JerryCap: "They can initiate an order by texting “Hi” to +91-8850008000, which prompts a link that opens a mini store on the browser, a…	neutral
Despite the significant decline last Thursday and Friday, the upward trend of the S&amp;P 500 is still intact. Only a significant drop below the last low (T2) at 2722 points would end the upward trend. #sp500 #stockmarkets #bullmarkets #StockMarketCrash2020 https://t.co/5D7uYbTya9	negative
High Risk $ABBV Walks Away From #Allergan $aapl $amzn $agn $brk $bhc $ba $cat $ge $gm $hlf $iep $crm $cmg $googl $jnj $wfc $bac $ms $gs $jpm $c $cs $msft $nflx $fb $tst $qsr $hd $tsla $ko $ibm $pep $mnst $abbv $pfe https://t.co/AmOkTdTVFQ	negative
RT @realmaxkeiser: A few Buffett facts: $AMZN too late $AAPL too late Airlines - Stock buybacks are criminal $WFC - Condoned millions…	negative
$AAPL 17-Jun-22 380 Calls Traded 381 times for $1 Million in premium. https://t.co/G0HqlxrpZ9 https://t.co/klP4lppe84	neutral
@LennyIce Interesting. My instinct was: to be on page 1 or 2, you have to pay the toll man (the 'e-tailer') via marketing spend. $AMZN can execute pieces of $GOOGL playbook over time. Related, I always found it odd the discrepancy between Europe vs. USA in terms of private label adoption.	negative
RT @MacroCharts: Fascinating chart from GS: Due in part to the speed of the rally, the relationship between $SPX returns and the relative…	positive
Microsoft to Post Q3 Earnings: Is Cloud the Saving Grace? $MSFT https://t.co/oxbNN9shpP	neutral
RT @NorthmanTrader: Each vaccine optimism headline is worth 1% on $ES. There are 150 vaccine studies. That should get us to $SPX 5000 by t…	positive
Pfizer $PFE Rating Lowered to Hold at Zacks Investment Research https://t.co/pcY3cGNjz2	negative
RT @SeekingAlpha: $XLE - XLE Weekly: Re-Test Of Key Resistance Holds As Relief Rally Stalls. https://t.co/6hJbBWhGp1 #stocks #markets #fina…	positive
$FB gave some nice buying opportunities below 238 this morning. I love it when bad news makes a good stock sell off.	positive
RT @theanimal23: My holdings in my IRA: $ROKU, $AYX, $FSLY, $TTD, $SHOP, $VEEV, $FIVN, $CRWD, $PINS, $DDOG, $MDB, $COUP, $AMZN, $MSFT, $NVD…	neutral
#JPMorgan Chase $JPM Has A Good #Fundamental Analysis Score (FA Score). Check various FA Indicators' value, score, 5-year chart like P/E, P/B, P/S, D/E, ROE, ROA, ROIC, Gross Margin, EBITDA, etc #stocks #stock #StockMarket #Investment #investing https://t.co/Gr3YvQytXq https://t.co/pV0VogSUeq	positive
🔴#Stocks making the biggest moves midday: ⁦@Apple⁩ , #Penn National Gaming, ⁦@Spotify⁩ @CNBC https://t.co/B2Okgg7RDI	neutral
Wells Fargo &amp; Co Reiterates “Buy” Rating for Abbott Laboratories $ABT https://t.co/aaGdMCBO68 #stocks	positive
RT @AdamMancini4: We're coiled very tight now in $SPX and price looks to be waiting for a catalyst. The triangle in my below chart is well…	positive
$UNH 17-Jul-20 ATM Implied Volatility is up +10.7% to 48.1. Straddle Implies a Move of ±4.2%. Earnings Jul 15 BMO. https://t.co/wvnSfNF68U	negative
RT @Madison89421615: $GOLD / $SILVER 50MA Bounce (Weekly) $work $docu $okta $msft $aapl $fb $amzn $nflx $googl $spot $twlo $twtr $uber $ly…	positive
RT @YellowFringeUS: BREAKING: Buying Airline! Saying One Thing To Shareholders Then Buying Airline.. Hmmm With Stocks Plunging, Is Now W…	positive
RT @Lakshmi_888: #Harmonics #Charts #trading $SPX #SPX #ES_F $ES $ES_F $SPY $DOW #DOW $RTY $RUT #DAX #FTSE $NQ #NQ Watching 2 upper blue…	neutral
$zion We have detected a noticeable rise in the Zeitgeist for Zions Bancorporation, N.A. at https://t.co/odDXHRLnwL Visit DataSwarm Markets for more information #STOCKS #NASDAQ DataSwarm ref: 101065	positive
GlobalData Plc - Tecpetrol SA - Strategic SWOT Analysis Review: Tecpetrol SA - Strategic SWOT Analysis Review provides a comprehensive insight into the company’s history, corporate strategy, business structure and operations. The report… https://t.co/exfPi2wMIF #equity #stocks https://t.co/v4S7aT06CV	neutral
RT @SharpStreetCap: Not liking the price action here on $SPX Would be very wary If your long watch out, If $3055 is lost could easily test…	positive
Today's purchases in my TFSA with @Questrade. No commission ETF purchases means I can buy any amount I want and not worry about fees. #stocks #etfs #personalfinance https://t.co/obDzdlnt0l	positive
$KTOV $MRK collaboration confirmed! Big surge in PM	positive
TIP OF THE DAY: Trading is all about the price, nothing else. The rest is just unnecessary noise. Price is the only real truth that you can rely on! #trading #price #tipoftheday #JSE #stocks #shares	positive
RT @RenMacLLC: Will the next 5% in the $SPX be?	neutral
RT @Goose_Trading: $OBSV (Current Price: 5.75) (Float: 31.716M) ObsEva and Yuyuan BioScience Technology Announce Submission of the Pre-IND…	neutral
US Stocks At 5-Day High [24-Apr]: $DJIA: 33% ⇧ ► https://t.co/YgRteIQKca $SPX: 44% ⇧ ► https://t.co/DqmNkSEm1j $MID: 51% ⇧ ► https://t.co/qt5HiYg2vw $SML: 43% ⇧ ► https://t.co/cW4c3xvv0r https://t.co/4b93yYPrfh	neutral
Insider Selling: Yext Inc $YEXT CTO Sells 2,500 Shares of Stock https://t.co/wxyvqmaGL9 #stocks	negative
Investors Buy High Volume of American Water Works Put Options $AWK https://t.co/znbZw8ptx4 #stocks	positive
RT @TheOptionGuys: Some of our subscribers and admins gains!! Join using link in the bio! General members pay nothing! Subscribers pay $50…	positive
Wells Fargo &amp; Co Increases Twilio $TWLO Price Target to $250.00 https://t.co/Eh2YCz2Lza #stocks	positive
$SPX #futures are up 3%+, suggesting the potential for another strong #market day tomorrow. The bullish 1962 analog identified on 3/24 continues to perform as hoped. #SPX $COMPQ #QQQ $QQQ $SPY #SPY #investing #coronavirus #COVID19 #stocks #economy #recession $IWM $DIA #STONKS https://t.co/G0unyaxjp5	positive
RT @tradertvshawn: Feeling #savage here with this $AAPL scalp!! LETS GO!!!! #stocks #trading #market #trader #markets #nasdaq #nyse #dayt…	positive
$AWOX #AwoX SA AWOX - BUY | EUR2(+125%) A new name, a new number of shares, a new listing place: all sounds good to us.: AWOX - BUY | EUR2(+125%) A new name, a new number of shares, a new listing place: all sounds good to us. Capitalize… https://t.co/NcvCz8eqQQ #equity #stocks https://t.co/iR1S9w2ewA	positive
RT @Sandro_power: $AAPL $GOOGL we made good gains following the rules not as much as we wanted to but good gains with skill. If you want to…	positive
CANCEL DEUTSCHE BANK $DB NOW! = #CHOMOBANK REAL #AMERICANS BANK #USA $GOLD $JPM $GS $BAC $C $MS $wmt $cvs $fb $aapl $nflx $googl $amzn $ibb $eem $pg $t $jnj $z $botz $msft $lulu $ibm $tsla $crm $pep $f $ge $pton $hd $jnj $cat $vix $xlf $mkc $rl $tgt $a https://t.co/VxlYxnIDi7	negative
RT @bti_trading: $EGO $GTBIF $PMAH Latest signals given by our algorithm on these stocks on our 1-hour charts. Join the winning team BTI Ma…	positive
@CN_wire LOL, that sounds like a court drama in the TV series.🤪 Li posted these in Dangdang's office and declare a war to his wife, Yu Yu(俞渝). By the way, Yu was the founder too. She declined the merge plan from Amazon. $Dang $AMZN #当当 #LiGuoqing #李国庆 https://t.co/KOOzFxkWz5	neutral
#KEC 233 15% RETURN SO FAR ENJOY HAPPY INVESTING SUSTAINING 233 CAN HEAD TOWARDS 250 #TECHNICALANALYSIS #STOCKS #STOCKMARKET #NIFTY #INVESTMENTS https://t.co/E5eCHjwCkE	positive
2020 First Half Portfolio Review (+19.4% Vs. -13.6% Russell 2K) #StockMarket #Economics $SPX $SPY https://t.co/JLKLJYQIgh	neutral
Closed at 38.60 after touching 40 , ard 39.95. Lets c tom. #trading #nifty #stocks #bankofbaroda #investing	negative
RT @MinteractApp: Friday's Top Flow in #industrial sector, Buy Flow &amp; Sell Flow $BA $CAT $CSX $FDX $GD $HON $FAST $LUV $WM $EFX $NOC $GE $P…	positive
@JustinPulitzer $AAPL, Still early, but looking for a look above and fail at the 161.8 fib extension at 398.05 of the previous Feb. high to the March low.	negative
RT @11Graphs: ★☆ #Stocks ☆★ (7/9) Least expensive by EV to EBITDA: 1. 🇺🇸 BIOGEN $BIIB: 7.6x 2. 🇺🇸 GENERAL ELECTRIC $GE: 7.9x 3. 🇺🇸 CATERPI…	neutral
$AAPL Twitter Sentiment on 13 Jul 2020 was: ▒ Positive 39.1% █ Negative 10.3% ░ Neutral 50.6% ▒▒▒▒▒▒▒▒██░░░░░░░░░░	neutral
No one is going to upgrade $PEP !?	negative
$UNH UnitedHealth Group Target Raised byCowen$281.68$320.00 ➝ $340.00Positive ➝ Outperform	positive
#germany issuing €130.5b in 7 &amp; 15-yr #bonds; via syndication instead of auctions 📌current #german YC isnt so great looking w/ 7yr at -0.47% &amp; 15yr at 0.19%, gotta hope #forex $EUR swings in ur favor or that ylds grind lower to make $$ #investment #stocks #economy #investments https://t.co/CqkoasKsyD	positive
RT @SystematiCK_: “I tried to detect those stocks that resisted the decline. I reasoned that if they could swim against the stream, they we…	negative
1900 PIPS Profit so far🔥🔥 For free signals, Join https://t.co/TRxnnWzlqf #audjpy #METATRADER #forexsignals #amzn #MT5 #GBPUSD #usoil #stocks #Forex #MT4 #fx #EURJPY #ForexAnalysis $BTC #bitcoin #ForexGroup #forexnews #GBPAUD 99130 https://t.co/UAXeIoVvzO	positive
Stock markets across the world have rallied today as investors anticipate a strong US jobs report. #invest #stocks #US #UK #eurozone #holborn https://t.co/j3IG19to8P	positive
$WOR #Stocks #StockMarket #WorthingtonIndustries issued Q3 EPS on https://t.co/savSNU1XbB https://t.co/JbweOBu6JG	neutral
@AdamMancini4 I’m seeing 2650 as a zone of support for $SPX. What are your thoughts?	neutral
RT @ManchesterUtd81: @EnronChairman @WillRayValentin @EnergyCynic $NOG isn't in the list cause its AAA like $CVX https://t.co/X97taAoX6i	neutral
RT @DeItaOne: **APPLE TO RE-CLOSE 7 STORES IN HOUSTON, TX ON COVID-19 SPIKE $AAPL	negative
3 Surprisingly Controversial Stocks in Donald Trump's Portfolio @themotleyfool #stocks $GILD $MO https://t.co/d9hlJnSRN3	negative
RT @SeekingAlpha: $F - Ford: A Cheap Stock With High Liquidity Brings Opportunity. https://t.co/KES63dU5FW #finance #stocks #economy	positive
RT @TicTocTick: Free trade plan: 1. Look for shortings below 2762, target 2554 2. Above 2762, buys targets 2815 Now 2732 $SPX $NDX #ES_…	negative
Bullish call option flow in $FB. This could break out if it rallies above $230	positive
RT @GerberKawasaki: This made my day. Tesla is bigger than Exxon! I LOVE IT! $XOM $TSLA https://t.co/WVrLaVRz2z	positive
Support becomes resistance for $aapl. When this puppy gives, look out below https://t.co/bH7MnavdjA	negative
New 6-Month Lows (Top 10): $HTZ -16.160%, $SHIP -10.970%, $JCP -10.910%, $EVC -10.670%, $RESI -9.380%, $MAGS -9.120%, $SMHI -8.100%, $HJV -6.770%, $GTYH -6.540%, $SBLK -6.370% #stocks #stockmarket #stockstowatch https://t.co/qdE4BxCrA5	negative
https://t.co/gyCmwHFgux $FB release.	neutral
#DumbMickey In Sturges, Sullivan's Travels, Joel McCrea in seeing a Mickey Mouse cartoon realizes the true aim and purpose of comedy or entertainment. $DIS has absolutely no clue - the reason Di will end up a dog and $NFLX, which has adopted Disney's old motto, shall shine. https://t.co/9FSb8l5pzP	positive
Yo this is fake right, lol... stinky breadth today on #stockmarkets $SPY $IWM $DIA $QQQ $SPX #SPX500 https://t.co/ETNuxJ6ctw	negative
RT @gvkreddi: Big Bull's portfolio, after being down by 28% in the last quarter ending Mar 2020, is up 12% in this quarter, with some new a…	positive
RT @ShellCapital: INVESTOR SENTIMENT STOCK MARKET POLL: How do you believe the stock market will close today? #SPX #SPX500 #SPX500USD $SP…	neutral
Another great week We hit the #BleachBowl - $CLX right into 204 closing off run from 185, swung some lotto puts as a kicker 🧼 $IWM a well-sizes double from 123.90 $DIS another killer week after Hedge helped you fend off the analyst garbage - looks like lots more to come	positive
RT @WingGirlTrade: SWING TRADING in this unbelievably good market Highly recommend this FREE "Swing Trading Strategy" ebook from the profe…	positive
IDEX -From what I hear they are a US firm Co. why was the CEO the only person to attend Bell Ceremony? This company is reminding me of LK only 2 people showed up for there opening I'm just saying something is fishy too many unanswered questions. #idex #IDEXFAMILY #stocks #gnus https://t.co/GcPkhaB0Q5	negative
Zacks: Brokerages Expect ADTRAN, Inc. $ADTN Will Post Quarterly Sales of $111.05 Million https://t.co/R07JMQmu0k #stocks	neutral
Hearing a lot about how frothy the markets are, so I did some quick valuation work on my portfolio. EV/Sales of each business I own: $SQ - 11.3 $SPOT - 6.1 $ROKU - 12.9 $MTCH - 13.6 $MA - 17.8 $SMLR - 7.9 $EA - 6.3 $AYX - 26.3 $LVGO - 44.1 Price appreciation ≠ overvaluation	neutral
RT @BobLoukas: #stocks - People complaining the economic numbers didn't match market action. That's because we came off a 35% crash into…	negative
(5:00am UTC-7 Apr 16 iPhone US Top 500 Grossing) $GLUU @KKHOfficial blows past $ZNGA Small Giant Games' Empires, Merge Dragon!, CSR2— Disney $DIS @SorcerersArena past $ZNGA Poker, WwF2 (cont...) https://t.co/Vyq2xgOGJY Source: AppAnnie #coronavirus #SocialDistancing #MegaTrends	neutral
$PLNT up AH on news gyms can reopen in phase 1 $PTON down on same news $SPY $SPX	neutral
RT @FXstreetNews: S&amp;P 500 to remain range-bound until a breakthrough on medical or economic front – JP Morgan https://t.co/CMP3ggue8g #Equi…	positive
$TPUB #Stocks #StockMarket #TribunePublishing reported Q1 EPS on https://t.co/savSNTKlN1 https://t.co/309pyDGLwo	neutral
RT @cadeinvests: A few solid dividend stocks with yields. $T - 6.75% $O - 4.53% $JNJ - 2.72% $MMM - 3.76% $MCD - 2.60% $JPM - 3.50% A lo…	positive
American Superconductor Co. $AMSC Expected to Post Quarterly Sales of $18.35 Million https://t.co/LRajsgon37 #stocks	neutral
RT @jbergASU: $SPX $SPY Can we close out this quarter already so we can get back to selling?	negative
RT @fboLoud: Invest in 🇺🇸American-Centric Stocks #Tesla received $4.9 billion in subsidies from taxpayers How much to China? Tesla's Tran…	positive
We are right there...2,890 in $SPX https://t.co/kC7kpGE57p	neutral
RT @TheChartReport: Today's Chart of the Day was shared by @AlmanacTrader Click here to read more! https://t.co/9o5YlPK7t6 #Seasonality…	neutral
RT @sbwcws: Apple price target raised to $444 from $310 at Canaccord $AAPL	positive
RT @GregCrennan: To continue to expose the #FederalReserve here is the power of attorney for @blackrock to purchase assets which include #s…	positive
$XOM in Downtrend: its price expected to drop as it breaks its higher Bollinger Band on June 5, 2020. View odds for this and other indicators: https://t.co/UC8WGVsOGa #ExxonMobil #stockmarket #stock #technicalanalysis #money #trading #investing #daytrading #news #today https://t.co/3tMZuzHrvY	negative
RT @AmericanBanking: Seanergy Maritime Holdings Corp. $SHIP Given $0.95 Average Target Price by Brokerages https://t.co/q0fZSt9e8x #stocks	neutral
FREEDOM Trade plan JUNE 30 2020: 1. Sell if below 3019 , target 2960 2. Buy if above 3019 , target 3084 3. Now 3029 $SPX $NDX #ES_F $SPY	positive
$spy $spx let’s see some fireworks	neutral
RT @getvolatility: Cheap call option upside: $CCL calls cheaper than 88% of history, $BIIB 88%, $HD 88%, $NCLH 88%, $HAL 88%, $WMB 88%, $W…	positive
Get those $V calls ready boys https://t.co/evm9YRnPLj	positive
$SPY C-Suite play lip service to diversity as merely a talking point. The chasm is wider in $IWM. Dimon often praised, but $JPM Board has one token black women. I have never seen a co more dedicated to making diversity matter than $SVMK. Proud bagholder. https://t.co/IZYFGkULZx https://t.co/BA16ge8Keu	positive
RT @PatrickWalker56: TOP 10 GROUPS. Leading Groups. Leading Stocks in those groups. Our screens find them. #stocks #investing ENTERPRISE…	positive
Some stocks in play today $AAPL $SPOT $INTC $ABBV	positive
RT @wijaranakula: The #SP500 is testing its 50-day EMA and continues making HIGHER-HIGHS. 😎 There should not be any CONFUSION about what th…	negative
.@bankofcanada forecasts #Canadian #economy likely contract another 10-20% in the second quarter. Then, the central bank sees #growth returning, but forecasts the #global economic #recovery to be protracted and uneven. #canada #jobs #money #investing #stocks #COVID19 #coronavirus	positive
Closed Sell DAL 30.55 for +73.0 pips, total for today +560.3 pips @. VIP Follower .@BigMan_Xander @. #crypto #forex #stocks .@	positive
15 Downsides to Being Rich @themotleyfool #stocks #rich #disadvantages #getrich #investing #millionaires #millionaire #billionaires #billionaire #wealthy #whoknew? https://t.co/FPQQ122pqs	negative
$IZEA. News!! $work $fb #instagram	neutral
RT @VolatilityWiz: $AMZN Bezos might be a trillionaire by Prime Day.	neutral
S&amp;P 500: Set for a 14% gain in 2020 if history repeats itself – DataTrek https://t.co/hY1GWzuJE3 #Equities #SP500 #UnitedStates	positive
RT @KimbleCharting: JP Morgan bulls and shareholders hope this isn't a kiss good-bye at dual resistance! $JPM $SPX $BKX $XLF https://t.co/4…	positive
RT @AdamMancini4: We continue to hover in $SPX at resistance of the rising wedge that now everyone's posted. I posted yesterday I was looki…	neutral
Looks like $JPM is propping up another restaurant company as $RRGB enters equity distribution agreement for up to $40M	positive
Group 3: Weekly Technical Video available for viewing in members area of https://t.co/BGHCdJqUxD #Elliottwave #Trading #Stocks #ETFs	neutral
Reinsurance Group of America Inc $RGA Receives Consensus Rating of “Hold” from Brokerages https://t.co/O3s9Bq3V6U #stocks	neutral
RT @NorthmanTrader: Since @JeffBezos &amp; $AMZN are making a killing due to their entire retail competition being forced to shut down perhaps…	negative
Strong Stocks watch-list for trading on June 24, 2020 $QQQ $SPY $IWM @tradealike #success #trading #options #stock #investing $GOOGL $BLK $CLX $V $DG $KMB $ZTS $TGT $CL $SNE https://t.co/iOTkDb14uk	positive
Monday Evening Most Active Options before Close Watching $AMD $AAL $INTC $INTC $TSLA $GSK https://t.co/gHGOQ1ObZV	positive
Dow up 350 $AAPL $AMZN $TSLA $NVDA $NFLX $BABA $MSFT $SPY $QQQ https://t.co/Iwc1Wt9XSR	positive
Hostess Brands Inc $TWNK Insider Sells $4,028,538.78 in Stock https://t.co/5f9hazuLWf #stocks	negative
UnitedHealth posts revenue at $62.1B in Q2, up 2.5% on an annual basis $UNH https://t.co/ocIXXSEUIq	neutral
Restaurant Brands International $QSR – Research Analysts’ Weekly Ratings Changes https://t.co/SfeHSvChMT #stocks	neutral
RT @BrianFeroldi: Great list of free investing resources: 1) Yahoo Finance - https://t.co/Xx3zedsQmJ Most useful tabs: Summary Statistic…	positive
You are doing investment in a company , not in a stock market. #investing #stocks #stockmarkets #ValueInvesting	positive
$AAPL Steady...... Steady.... Easy does it now. Think we can put on another 80 before she tumbles. https://t.co/OVrCyZY3ly	positive
EURUSD Rebounds and Extends Gain to the Region of 1.0900 Level #stocks #trading ... https://t.co/znauJngpRT	positive
$TWTR $FB $GOOG - Trump order to enable punishment for social media - WP https://t.co/MJcmwbTYlq	negative
Futures Movers: Oil finishes higher with supply cuts and pickup in demand lifting U.S. prices by more than 3% #stocks #market https://t.co/k5iFXKNBpw	positive
@Mindwbw $AAPL keeps milking their customers. 100% fine with that, every business does that. But the customers dont have any milk left.	positive
RT @RedDogT3: $FB looks tight again. It's been a bit of play since the President criticized social media names. I did buy some vs. the $225…	negative
Implied Volatility getting it done with Dmitry !! This can help in your research in $T $Z $V and $MS for examplr, https://t.co/2ngRM0KVde #options #optionstrading #tradingideas #volatility #investing	positive
Nothing like a cup of coffee &amp; reviewing the capital markets to start a Saturday morning. First stop US #stocks: Momentum surge in Consumer Disc. and Comm. Serv. sectors &amp; a bounce out of Financials to close the week on potential COVID-19 drug innovation. @FactSet data. https://t.co/SLkSyr1vZB	neutral
RT @stockspastor: $SPY bullishness can’t be ignored. Already overbought but they continue to push it higher. Thanks to free money @Option…	positive
RT @leadlagreport: OECD projects the European region’s growth to be worst hit by the pandemic in 2020, while Korea and China (the original…	negative
So who bought $AMZN in March when it was in the $1600s? It’s over $3000 now. Wild!	positive
RT @TimmerFidelity: (THREAD) Could the huge rally since March 23 be just a bear market rally? And how would we know? Let’s take a look at h…	negative
RT @MarkMcSherryNY: . Standard Life Aberdeen To Sell Another India Stake For £260m - Scottish Financial Review https://t.co/ItvE4dmVgg @h…	negative
RT @Madison89421615: SELL #BITCOIN BUY #GOLD 4YR Weekly - $GOLD 50MA Bouncing $btcusd $eth $ethusd $usdt $xrp $xrpusd $bch $bchusd $bsv $…	neutral
RT @GerberKawasaki: The Fed is buying everything. Markets moving higher. They borrow at zero and earn positive returns on these bonds. The…	positive
$NQ $ES_F softer but still green. Would prefer green open as gap down on $SPX would open up possibility of a gap fill higher. Watching $SPX 5EMA downside support and the gap fill higher at 2912 resistance. Also intrigued by 5 month EMA 2898 which is also yesterday's HOD.	positive
RT @YahooFinance: Highlight: For $AAPL, “there’s prospects potentially more so of a V-shaped recovery,” @DeutscheBank Research Analyst Jeri…	positive
RT @forexanalytix: Take a Peek of the Week Ahead! https://t.co/064TwtIgm4 In today's video Blake discusses the $SPX $AUDJPY $AUDUSD and $E…	neutral
RT @TheDividendDean: 📈 Free Technical Analysis Stock Lesson 📉 Want to learn more about the tools day traders use? I'm going to break down…	neutral
RT @ISABELNET_SA: 🇨🇳 China Flows Second largest weekly inflow into China ever. Is a new bubble in the making, as in 2015? 👉 https://t.co/J…	neutral
Eeryone loading up here ? Load the boat $AAPL 450-500 $TSLA 1800 $BA 500 $AMZN 4000 $GOOGL 2000 $HTZ 20++ bookmark this @me after the next 2 Fed infusions	neutral
Source of Beijing’s big new #COVID19 outbreak is still a mystery https://t.co/gsnaL8cbN3 #ChinaIndiaFaceoff #ChinaLiedAndPeopleDied #China #COVID19 $HAO $BCNA $ASHX $FLTW $CHNA $CHIX $YAO $CNYA $ZHOK $CQQQ $NIO $TVIX $UVXY $CHIM $CHII $AFTY $NIO $TSLA $AAPL $AEMD $AMZN $CHTR https://t.co/aDnngFkEQj	neutral
Charles Schwab Co. $SCHW Receives Consensus Recommendation of “Hold” from Analysts https://t.co/JNLav1AEzl #stocks	neutral
RT @raymond10mm: #down day again $spx $es_f $AAPL #daytrading #investing #futures $spy $nasdaq $zb_f $nq_f $cl_f $GC_f $XOM $ibm $amzn $goo…	negative
Shanghai Disneyland Tickets Sold Out in Minutes $DIS https://t.co/uylg6W1VDH	positive
RT @freezerohedge: Major companies that have said they're decreasing or halting ad spending with $FB Adidas Reebok Ford HP Microsoft Unile…	negative
Breakdown #stocks (sharp move below recent support) $HPQ $MRO $TBLT $IRWD $DVN $WKHS $BCRX $CLR $AKBA $IOVA Sort results by Time, Chg, %, Vol and more. #nyse #nasdaq https://t.co/ntbYbUlrMe	negative
RT @permabear_uk: $MSFT broke a new historic high, settling +0.8% to $189.80. A day for Nadella and team to celebrate. @petenajarian https:…	positive
@CNBCFastMoney $AAPL-- WILL WARN SOON. INSIDER SELLING	negative
A quick explanation on what trailing stops are as well as how to visualize them. #didyouknow #stockmarket #technicalanalysis #trading #knowledgeispower #stocks #learningeveryday #stoploss #trailingSL #profitidea #knowledgeisprofit https://t.co/Cqc3FG29gB	negative
RT @Drugdoctor2014: $AYTU Bio $1.54 - it's $25 Rapid Test shows 39 of 39 positive results CONFIRMED with second test! $SM $ECR $GPOR $CXO…	positive
RT @conkers3: @amanzella3 @Borg74 @HW_MA @TheAngelofAIM1 @AIM_profit @TunbridgeJacqui @rubenescu10 @cH2ange @glr_1990 @MY21_Oracle @henryv…	neutral
RT @SilviaBellrock: Hi everyone, I just uploaded a new video on YouTube 👉🏼 https://t.co/EYoGnYmJbf I am talking about the current market si…	neutral
RT @Sandro_power: Live Stream Tonight on my youtube https://t.co/oN9Cc4EGKy at 9:45pm EST Time Canada Fiqure out your time zone to match…	neutral
@BasaniteI,( OTC: $BASA ) Building America Back Better 🇺🇸 “ BasaFlex,™ Steel Alternative ” * Made from volcanic rock * Stronger than steel * Will never rust. 🚧 #Rebuilding #BuildBackBetter #Innovative #infrastructure @CNBC #Construction #stocks #CNBC #StockMarket $ALYI https://t.co/1BEeIvVDga	positive
One for the #MoveWest crowd. [Chance to become Jan Koum's neighbor.] $FB https://t.co/N0VMQ0qFHs	neutral
RT @WallStCynic: Sigh. The ridiculous “$TSLA is just like $AMZN in its early days” trope is making the rounds again. Setting aside that the…	neutral
RT @BrokeDayTrader: @CNBCnow Here comes more Chinese sanctions for Hong Kong. Funny how he waits til after the markets close. If it were go…	negative
$AMZN $2992 you’re welcome	positive
Hard to argue that #bitcoin is not correlating with stocks at the moment. #bitcoin seemed to go green last Sunday when $SPX and $DOW futures traded green and followed through with a move to $7,440, but #btc bulls lost momentum over the weekend. Again.	negative
RT @eWhispers: #earnings for the week https://t.co/lObOE0dgsr $AMZN $TSLA $MSFT $AAPL $AMD $BA $FB $LUV $MMM $GE $AAL $UPS $TWTR $PFE $…	neutral
Todays Stonks: S&amp;P 500 is Starting to Stonk (0.47%) Dow 30 is Starting to Stonk (0.85%) Nasdaq is Starting to Stonk (0.17%) #Stonks #Stocks #StockMarket	neutral
RT @JohnTocci: I don’t know who needs to hear this, but $AMZN is ridiculously overvalued at the current price.	negative
RT @realJosephRich: If you're buying based on "virus optimism", I'm sorry, you're an idiot. $JPM missed earnings by over 50% (0.78 vs 1.8…	negative
$EWJ https://t.co/ZTIcvYqTx7 Pot. cont. Downtrend INTRAWEEK 60m-15m-4m combo chart #Nikkei #stocks https://t.co/IRI1QQuXha	negative
RT @QuantTradingAI: Do you TILT when trading? Learn to trade without emotions by using AI Trade Ideas A.I./Algos have been on fire the p…	neutral
RT @unseen1_unseen: Market finishes higher. Dow up +280pts SP500 up +1.44% Nasdaq up 0.77% It was a very good week for the market. Fi…	positive
RT @letsinvestnow: $JPM Great uptrend since breaking out of a multi year base. Good EPS today to help it continue higher https://t.co/kr…	positive
@CleeStuntin Let's make some money $AAPL $MSFT $AMZN $FB $NFLX $GOOGL $AMD $ZM $BYND $BA $BABA $DAL $WMT $HD $TSLA $QQQ $SPY $BA $NVDA	positive
$BYND guys news, this could be a great swing after dust settles https://t.co/qodH7IlN46 https://t.co/fkQ9G5X0fB https://t.co/DvUeqCl2I0 https://t.co/fJn680GtHm $SPY $QQQ $FB $DIS $nflx $AAPL $TSLA $TWTR $MU $MRNA $PTON $MRK $AMD $NVDA $SHOP $SQ $BYND $SPCE $GE $WORK $SNAP $ROKU https://t.co/PWki9rRfgJ	positive
RT @NewsAurChai: Sensex jumps 290 points led by bank stocks. Equity market surged in the last 30 minutes of today's session, ending higher…	positive
Cantor Fitzgerald Reaffirms Neutral Rating for Vocera Communications $VCRA https://t.co/TOUK0qHGGs #stocks	neutral
RT @Hatchatorium: $TSN is using $MARK. They just showed it on CNBC. Plus, ROTH has a $20.50 PT on MARK. This is going to be a 40 bagger! $T…	neutral
#Starbucks Warns Of Big Loss, Sharply Scales Back Expansion Plans. Stock Loses Ground On Key Support #Stocks #Retail $SBUX https://t.co/Loez1wRTBK https://t.co/pklvY30iOJ	negative
Building Permits (MoM) (May) 1.220M - 1.228M - 1.066M Building Permits Change (May) 14.4% - - -21.4% #BuildingPermits #USD #US30 #SPX500 #FXCM	neutral
RT @Norrenberger: 1/2: For most of us, technical investment terms can be confusing. #investment #investmentopportunities #capitalinvestmen…	negative
I just sold my $AAPL $370c for $5.00 per contract. I had 5 contracts.	negative
RT @wallstreetelix5: Here comes the breach of yesterday’s high. About time. Not a top.... $es $ES_F $spy $spx	negative
My IRA +47% YTD gain breakdown Stock 64% Options 36% Realized 82% Unrealized 18% Top contributors ❇️ Stocks $NVDA 19% (of course, right?) $TSLA 9% $TTD 9% $NVTA 8% $BA 7% ❇️ Options $GOOGL 11% $AMZN 10% $SPY 5% $BAC 4% $GS 3% Misc 13% https://t.co/fRbCcyaM66	positive
RT @ETFsDayTrade: This is a brief summary of our math Model for $DJIA $SPX today for you to compare va real-time. And see our previous post…	neutral
$spy $ES_F $spx to be honest, that 2538 unfilled gap is actually a double unfilled gap (was a island bottom gap) https://t.co/x00mm7dTc3	positive
RT @AnalystMarketer: In the team we trust 🙏https://t.co/zp6vcyvl9U Alert + update+ chatroom 💻📱 Watchlist 📝 &amp; chart 📈 $SPY $TSLA $SHOP $AMZ…	positive
$BTC #Bitcoin correlation intermarket #SP500 vs #BTC SARS-COVID-PART 2 i be back https://t.co/SrRpe0rvbx https://t.co/CV3EmFqrZm https://t.co/QrzlcEEmow https://t.co/fFJYAK4ds9 https://t.co/mTXZK2WOQP	neutral
RT @TicTocTick: 4/20 weekly plan: Play only on short side below 2860, target 🎯 2661. Friday close 2667. $SPX $NDX #ES_F $SPY Plz share…	negative
Recent Research Analysts’ Ratings Updates for Autoliv $ALV https://t.co/8CdP7zPJxJ #stocks	neutral
Head-To-Head Comparison: America Movil SAB de CV ADR Series L $AMX and Liberty Sirius XM Group Series A $LSXMA https://t.co/8A4HKbvmpS #stocks	neutral
RT @DividedBrothers: 📗Brothers Divided by J.W. Worsham is ONLY $9.99 to download on 📗Barnes &amp; Noble Nook https://t.co/ib6fUnqpyI #B…	neutral
RT @ETFProfessor: The U.K. government just sold more than £3 billion worth of government bonds at a negative yield for the first time. #sto…	negative
"Crawling from the Wreckage: US Stocks" (4/13/20): A review of previous major bear trends for the US stock marketplace going back about 125 years does not show a single trend which ended in one month. Will this time be different? #stocks #coronavirus https://t.co/UulwqyHoPZ	negative
RT @Tickeron: $AAPL in +1.02% Uptrend, growing for three consecutive days on June 3, 2020. View odds for this and other indicators: https:/…	positive
$ADBE #Adobe #Options #maxpain Chart, Open Interest Chart Update #OptionsTrading #OptionsFlow #optionstrade #optiontrading #stocks #stock #StockMarket #Investment #investing #invest #investor #investors #UOA https://t.co/5JE2nlalc3 https://t.co/EIXeMynIki https://t.co/u2DBMyg8kg	positive
Microsoft $MSFT and Algorand $ALGO teams working on Secure Framework for Private Deep Learning. 👀 https://t.co/A9hbTagyC8 #blockchain #cryptonews $ada $xlm $xrp $eos @IBMBlockchain @Cointelegraph @CoinDesk #ethereum #defi $snx $link $enj $nem $ltc	positive
RT @chigrl: S&amp;P500 now more concentrated in the 5 largest stocks than ever $MSFT $AAPL $FB $GOOGL $AMZN https://t.co/0W1mMCWQ59	neutral
Canopy Growth Announces 'Strategy Reset' After Huge Q4 Loss; Marijuana Stocks Fall $CGC $STZ $CRON $ACB $TLRY #CannabisCommunity #CannabisStocks #MarijuanaStocks #Stock #Stocks #StockMarketNews https://t.co/zKvzxVeycf	negative
RT @KobeissiLetter: S&amp;P 500: UPDATE ON #CORONAVIRUS vs FINANCIAL CRISIS vs DOT-COM. $SPX is now approaching the 20-month moving average, w…	negative
Weekly Analysts’ Ratings Changes for Fortune Brands Home &amp; Security $FBHS https://t.co/YVfTmFEtLR #stocks	positive
We're Live Now!!! UTILITIES, INDUSTRIAL, FINANCIALS, TECH! #investing #dividends #stocks https://t.co/nGNpAUUaty	positive
RT @DTAPCAP: Extreme sentiment dislocation. Only 22% bulls on #stocks (AAII Survey) BELOW March level when mkt collapsed. Everyone must…	negative
To learn options trading in #stock like $AMZN and $FB for example ..what are the best online applications to do that? https://t.co/lhD2SFttbU #optionchain #volatility	positive
RT @WaltLightShed: "We are so far beyond tolerance, this is about justice" Randall Stephenson, $T	positive
RT @MarketRebels: Zuckerberg loses $7 billion as companies boycott $FB ads https://t.co/zI1b40gyxZ	negative
$SPY $SPX sold @ $16.34 +20% https://t.co/dScnIEoAe5	negative
buy bnf 20340 spot sl 20190 tp 20465/20575 #banknifty #Nifty50 #BANKNIFTYFUTURE #NSE #Indices #stockmarkets #stocks #bankniftyoption	positive
Monday SPECTACULAR ONGOING TRADE in Callon Petroleum Company now up 68% for just today $CPE #stocks https://t.co/do9yNEn5CV	positive
$FRKN #Frencken Group Ltd Frencken Group - Resilient and stable portfolio stands out in tough times: High-tech component manufacturer Frencken is a longer-term beneficiary of positive trends in the technology sector. With a diverse… https://t.co/x5Giurimzp #equity #stocks	positive
9 Investment Pitfalls #Investing #Retirement #StockMarket #FinancialPlanning #Stocks Download our free white paper https://t.co/aPklwNhlpu https://t.co/aem8LenKol	positive
Here Is The "Secret Weapon" That Allowed Tiny Oil Producer Mexico To Defy Giant Saudi Arabia | Zero Hedge #money #stocks #Bloomberg #crypto #bonds #gold #silver #trump #cnbc #oil #barrons #music #eu #uk #Canada #California https://t.co/Mo4Uwnj4KB	negative
$PIX #Pixium Vision SA Pixium Vision - Restoring eyesight in advanced Dry-AMD: Pixium Vision is developing Prima 2, a potentially breakthrough wireless bionic vision system (BVS) that generates electrical impulses at the retinal bipolar… https://t.co/1R0NViPwVs #equity #stocks https://t.co/QeO17cxG0u	positive
RT @crescatkevin: Smug traders think a big CFTC non-commercial net short is bullish. It was actually its largest ever right before a majo…	positive
RT @Mephisto731: Braindumping a thread on $SPX, $VIX and vol dynamics prompted by a really nice tweet by @JimmyJude13. Robinhoodies, we're…	positive
Wells Fargo &amp; Co Raises Wayfair $W Price Target to $120.00 https://t.co/GJs8bUT6p5 #stocks	neutral
RT @marketmind3: Similar $SPX short set-up as I saw in February. Market making highs, but weak under the surface. At the time, I wasn't pre…	negative
$JPM: New SEC Filing for $JPM: Form 424B2 (No. 0001615774-20-006297): https://t.co/d5U9J0CxhF	neutral
RT @SheepKnowMore: $FB has a different tone because of mass suppression of dissenting voices. Folks are more fearful of backlash, not reali…	negative
Google Zero clicks are killing Wikipedia. h/t @hackernoon #Google #search #Wikipedia #stocks #organicsearch #SEO #zeroclicks https://t.co/BqvMbhGowW https://t.co/TtcsJOlnNX	negative
$AMZN is red right now. Probably nothing.	negative
@jpmorgan chart showing that positioning has inverted for speculative futures contracts on $SPX. Long vs Shorts still very much defensive as the economic backdrop continues to be a short position paradise. https://t.co/7gynxBDQVF	negative
$NLSN $VIAC $DIS - Media giants to miss out on out-of-home ratings boost https://t.co/BFbsP42Mfh	positive
@BullishBearz If this rally is to continue, I think we need some bank participation. I bought some $BAC calls this morning.	positive
$JNJ, $PG, &amp; now $COST. Strong companies continuing to increase their dividends during all of this. Awesome!	positive
RT @FactSet: $SPX EPS estimate for Q2 declined by 28.4% in April while $SPX price increased by 12.7% during the same period. https://t.co/A…	positive
$AAPL may be the chart to watch here, having broken trendline support (along with many stocks) this week but trading back higher. Also bounced off 38.2% Fibonacci level and the 200-day not far below $255. Chart feels heavy with RSI never getting above 60. https://t.co/d6RmEKZxJa	negative
RT @MarketCurrents: $FB - Buy the dips in Facebook, says MKM bull https://t.co/0EHauoV4AR	positive
RT @permanentcap: Google/Alphabet $GOOG almost literally lights their cash on fire (other bets) to hide the profitability of the search bus…	positive
Dow futures up 190 points after blue-chip index rallies back above 25,000 ⁦@CNBC⁩ #Dow #futures #stocks #investing #markets https://t.co/kjekBzL3AR	positive
RT @TicTocTick: RTH Plan June 10th: What are traders watching 🤔 tomorrow? 🏹 we watching 3180 (now 3225) 🏹 IMO 3180 can be revisited, b…	neutral
RT @Lakshmi_888: #SPX $SPX $ES_F $SPY #DOW $YM $NQ #NQ $RUT $DIA #DAX #FTSE #Harmonic #Charts #trading $SPX update https://t.co/3qmAg34h5c	positive
Track news with various time frames for $DJIA under one watchlist $CVX $BA $IBM https://t.co/8zP8MKc2dK https://t.co/KzcvbztalN	neutral
May 29 Friday, $PEP LOW is $130.91 and hit Bearish target $131.11🤙	negative
RT @i_Know_First: Beat Stock Market With AI in Corona Times: Top 20 Stocks For This Week ☆ Oil Forecast: Is It The Right Time to Buy? Guide…	positive
RT @MommasOptions: I continue to add to my core long dated positions on dips. $LMT $DPZ $AAPL $AMZN $ROKU $DIS $BA $SHOP $DAL $AAL. With th…	positive
Ready to try the crypto “Pi network." Stanford University PhD graduates made the first phone app that mines currency absolutely free. Because it is beta you need a member to invite. Use code (xcsresources) $nkla $tsla $gnus $xspa $amzn $idex $mark $svte $mvis $ne $idex	positive
What I'm following this week mostly in order: $SPY $BA $NVS / $INCY $SPCE $PENN $GILD $MRNA $WYNN $LMT $ZM $AMZN $TSLA	neutral
Trump Was Behind On Jobs Goals Before The Virus Leading Me To Wonder If He's Behind The Virus. $aapl $amzn $agn $brk $bhc $ba $cat $f $ge $gm $hlf $iep $crm $cmg $googl $jnj $wfc $bac $ms $gs $jpm $c $cs $msft $nflx $fb $tst $qsr $hd $tsla $ko $ibm $pep $mnst $cat $unh $pfe $cpe https://t.co/J0B4ajXo61 https://t.co/ias9PCpcfc	positive
$AMZN left 3 sets of singles behind today	neutral
S&amp;P 500 | $SPX | $SPX500 $USD SPX CORRECTIVE WAVE C Long or short it with BTC on Trade8: https://t.co/MIe9xn4UCg https://t.co/MynXzOcXHI	neutral
$INTC give me a $56 range retest so we can “maybe” go $52s 😁 #Stocks #OptionsTrading https://t.co/ghX9LNm0HY	neutral
#US100 hit 2nd target!✅ 125+ Pips🔥🔥 1250USD Amazing profit 🔥🔥 For more Free signals : https://t.co/ZCdNurWdYg #stocks #EURUSD #forextrading $ETH #XAUUSD #AAPL #GBPUSD #forexsignal #USOIL #Forex $BTC #FB #fx $BTC #CRYPTO 833234588 https://t.co/1C1NKUXtjN	positive
$1.12 Billion in Sales Expected for Silgan Holdings Inc. $SLGN This Quarter https://t.co/BDYcir1n0d #stocks	neutral
#NOME?	neutral
June 25 Thursday, $AAPL HIGH is $363.38 and hit Bullish target $362.98🤙	positive
$FB testing my patience this morning Stuck with the @trickmitch1 #TrickTrades morning plan off the levels and took my green Simplify folks #DayTrading	negative
RT @michael_venuto: The Bank of Japan owns nearly 80% of all ETF assets in the country. #stocks #markets #economy #investing #financialserv…	positive
I got $AAPL at $336 triangle. Up 60%. I am NOT your #Guru.	positive
RT @JP30361625: Word on the street has $DECN making a significant move on Monday! Proud to be an early supporter of this company! Stay tune…	positive
Why I'd still rather Short Bitcoin | Cryptosomniac rebranded to The Alpha Trades https://t.co/ETKs5kzNXZ @the_alphatrades #thealphatrades #alphatrades #trading #crypto #cryptocurrency #markets #finance #investing #sp500 #equities #sp500futures #minifutures #wallstreet	neutral
RT @i_Know_First: Stocks to Buy Based on Algo Trading: Returns up to 112.0% in 7 Days https://t.co/WFRfFreUdp $DPW $ENT $QEP $ELGX $GTE $N…	positive
Vetr users have upgraded https://t.co/WkaxsQ7i5z, Inc. to a HOLD Rating (3 stars), giving $AMZN a target price of $2288.05 https://t.co/rwVhF9BRHJ	positive
RT @InvestorIdeas: 📣 New Podcast! "Investor Ideas Potcasts, #Cannabis News and #Stocks on the Move; Episode 398 - (TSX: FAF) (OTCQX: FFLWF)…	neutral
Aequitas Research - Genetron (泛生子) Pre-IPO - Expertise to be proven outside brain tumor: Genetron, a China-based precision oncology company, plans to raise up to USD 100 million to list in the US. Genetron was founded by Dr Yan, a… https://t.co/xAPmwS46jX #equity #stocks	negative
$CFG #Citizens Financial Group ... Wedbush Morning Call - Jun 26 2020 6:57AM: | https://t.co/jZGjitclUo #equity #stocks	neutral
RT @leadlagreport: Little rant here. People call the VIX the "fear index." Volatility isn't fear. Volatility is doubt. It's doubt abou…	negative
From the makers of the MP3 codec… imagine the reduction in streaming costs for #NFLX, $AKAM, $GOOG, etc. https://t.co/HNP2Z2sJCf	neutral
$tvix $uvxy $vxx $vix Watching $spx 2800 ⬅️ under = omffffg sell sell sell this market	negative
RT @Coolfundoo: STAR Stocks &amp; My Screening Techniques Data as of 11Jun2020 8🌟Stocks @Coolfundoo Screeners Techniques = Screener Names…	neutral
RT @The_Real_Fly: PORTNOY FINISHED SESSION "ALL IN ON DISNEY" $DIS	neutral
50 DMA Resistance today: $VZ ... https://t.co/mnYaiRq1wk	neutral
I must be the only person who looks at these esoteric VIX products because I feel like this should be getting a lot more attention. CBOE Equity VIX on $AMZN is back to mid March highs. In that same time the stock is up 90%. $VXAZN https://t.co/g7geHzVGEQ	positive
RT @IliketotweettoU: Ouch. Expect More Dividend Cuts From Other "Safe Investments" $aapl $amzn $abbv $brk $bac $bhc $crm $cmg $msft $fb $…	neutral
RT @Aleksomate: Crucial trendline (resistance) has been targeted on Dow Jones 30. This is it; new all time highs, or resume of crash? $S…	negative
ExlService Holdings, Inc. $EXLS Short Interest Up 57.5% in April https://t.co/WoJVe37Wu2 #stocks	positive
RT @Investingcom: *BREAKING: *FACEBOOK SHARES TUMBLE 8% AMID ADS BOYCOTT $FB https://t.co/2fTlsYo3l2	negative
Weak Liquidity for the start of day see market thoughts on that and $XOP and $DRIP to $7 ? . $USO $OIH $CL $IWM $RTY $XLE $DRIP $GUSH $ERY $ERX $SPY $SPX #IrresponsibleFedPolicy @CNBCFastMoney @CNBC @wsjournal @MarketWatch @BBCBreaking @YahooNews @TheTodayShow @CNN https://t.co/K1aO6Q30dI	negative
RT @leadlagreport: These are the long-term valuations of several asset classes around the world. #stocks #markets #economy #investing #fina…	positive
$IPHI - Inphi's (IPHI) CEO Ford Tamer on Q1 2020 Results - Earnings Call Transcript. https://t.co/AVIx2P5nbC #stocks #business #investing	positive
We're still looking for someone else who can beat our performances! Try free for 7 days https://t.co/7sAfbFrPQS $ZTS Signal: ** BUY ** Since: 2020-04-06 Our performance: % 1.55 https://t.co/I9E5whEyqp #trading #stocks #stockstowatch #stockstotrade $SPX https://t.co/H4utjJEVM0	positive
Consumer Cyclical #Stocks Moving In Thursday's Pre-Market Session: $DPZ $JCP $LITB $MLCO $NLS $SNBR $WYNN #MarketUpdate https://t.co/x5WgNpoDDB	neutral
@AOTtrades $HD please, looks poised for breakout	positive
RT @PaikCapital: 2 hour dev project inspired by @CJ_Johnson17th. Might turn this into a nice web app with more sophisticated features! C…	positive
RT @DylanByers: $FB up 5%	positive
RT @DreadBong0: A Deep Dive on the Data-focused @Vectorspace_AI 👉 https://t.co/7MLTR4r1L4 ✅ How to buy $VXV ✅ Team background &amp; TR ✅ Pr…	neutral
RT @carlquintanilla: * JPMORGAN CHASE &amp; CO TELLS EMPLOYEES IT IS DEVELOPING STRATEGY TO RETURN EMPLOYEES TO WORK -MEMO * JPMORGAN HAS NOT…	neutral
+$368 - $AMZN $BA - In premarket ! saw that $AMZN received a huge upgrade from Needham. I was looking for a long once the morning profit taking took place. I entered and sold when I was happy with profits. I’ve been… https://t.co/xnpIdMPiTN	positive
RT @LNGeconomist: DO NOT CHASE INTO QUARTER END DO NOT CHASE INTO QUARTER END DO NOT CHASE INTO QUARTER END DO NOT CHASE INTO QUARTER END D…	neutral
RT @quakes99: Resource Maven on #Uranium: Why The Bull Is Building &amp; How To Position 🐂⚛️⛏️ Gwen @miningmavengwen leads a discussion with Sc…	neutral
RT @AdamMancini4: Many signs the $SPX rally is tiring: up 30% with only one 8% dip, RSI(5) back at February levels and now setting divergen…	positive
@phoenixvalue Vision into the future [5G] tells me, $QCOM &amp; $T could easily make it here!	positive
RT @vitaliyk: Microsoft was a great company in 1999. $MSFT was still a great company in 2017 - it would take you 18 years for you to break…	positive
News Alert: FSD Pharma -Applying for an I.N.D. for its compound to Treat COVID-19 Patients $HUGE https://t.co/gMuscqItVQ $AZN $CASBF $GSK $INO $JNJ $MRK $MRNA $NVAX $PFE $SAN #astrazeneca #GSK #INO #JNJ #Merck #moderna #Novavax #Pfizer #sanofi #nasdaq #biontech	positive
$SPX Held back by a diagonal. Still a bearish chart BTW - it could make new highs and the large wedge can still play out. #SPX #SP500 #ES_F https://t.co/0fjBgW45AN	negative
@BarclaysIB $SPX Put/Call Ratio via @TheTerminal https://t.co/5egaN0YV47	neutral
RT @LMT978: $INTC projected declining EPS for 2nd Q, loses some $AAPL business, the stock rallies 5% off the open &amp; closes higher on the da…	negative
Never seen a chart screaming BUY like $MSFT https://t.co/cqTC6zw38n	positive
Sensex, Nifty lose early gains #Nifty #Sensex #nifty50 #NIFTYFUTURE #StockMarket #stockstowatch #markets #Sharemarket #coronavirus #CoronavirusOutbreak @stoktalk_ #BSE #NSE #Stock2020 #StocksToTrade #Bears #stocks https://t.co/SYu6iXMhwO	negative
$MSFT are you okay? https://t.co/vNIBpzbbpW	negative
Read alot of people shorting $GOOG into earnings wonder if they have the grapes to explain themselves.	negative
RT @merryjoportell: #BreakingNews Israeli Hospital to Begin Treating #Coronavirus Patients with Cannabis. #COVID19 #COVID2019 #cdc #Chines…	neutral
Best stocks to buy #stocks #stock #market #investment https://t.co/GVfyqB8OKe https://t.co/67Vibk2qEZ	positive
RT @The_Real_Fly: MORE CLOWN WORLD: APPLE FREEZES BROWSE FEATURE ON MUSIC AND REPLACES WITH NOTICE AND CUSTOM PLAYLIST. THE LAST SONG IS “F…	negative
🔴🔴 Why Circuit Filters not Applicable on Derivatives Stocks? 👇👇 https://t.co/drUbUKshaY @nitinbhatia121 #StockMarket #Trading #Stocks #TechnicalAnalysis #Equity #YouTube #SwingTrading #NIFTY #ShareMarket #stockstowatch #StocksToTrade #StockMarketCrash2020 #stockmarketcrash https://t.co/K1a8AdqHyO	neutral
Bullish setups patterns/consolidations I'm personally watching to enter long $EROS $SBUX $COTY $NXPI $UNH $PLAY $BYND $NCLH $FIS $SABR $RCL	positive
RT @MDTrades12: At this rate if everyone bans $FB it will be at aTHs	negative
$TIF Tiffany Option Alert: Jan 15 $90 Puts at the Bid: 1500 @ $6.0 vs 7917 OI; Earnings 6/16 Before Open [est] Ref=$114.0 [6/3/2020, 2:50:13 PM] [+$500k Sweeps Above Midpoint] Other Sweeps on: $FEYE $ALT $MGM $CSTM $V $CHEF $CLF $PPC $BABA $RDFN $NKE $ESPR	neutral
$BA $EADSY - Qatar Airways Threatens Boeing And Airbus. https://t.co/e6z3xkhcuz #business #stockmarket #stocks	negative
RT @syinvesting: #RNA therapeutics are hot. $AZN / Accent (Jun '20): https://t.co/kpqB0Fw6GL $MRK / Skyhawk (May '20): https://t.co/bXoJL…	neutral
TOP TEN Stocks Result after 29 years : 100'000 became 1'900'551 The unique and solid TOP TEN is only in the stock letter. Get the full insight https://t.co/QOVYdc6R0q #stocks #StockMarket #stocktips	positive
Stocks were basically flat for a LONG time during the Bush years and did not begin to recover fully from Dot Com until well into Obama's first term. 2800 could be fair valuation indefinitely. #covid19 $SPX https://t.co/SWcabvBzOB https://t.co/pk4QNzuoYs	positive
Weekly Outlook 2020 Apr 27-May 1 (No LIVE Sports - No Problem; SELL in M... https://t.co/rb36rvHopQ via @YouTube #FOREX #STOCKS #REVIEW	negative
#KOTAKBANK drifting 1299. Reco at 1334 #Bse #Nse #nifty #banknifty #hedgefunds #fundmanagers #stocks #equity #trading #Traders #stockstowatch #StockMarketindia #MarketScreener #Charts #technicalanalysis #elliottwaves #OptionsTrading #markets #ETFs #ETF #index #algotrading https://t.co/Fv05QTLsbL	neutral
@SatoshiFlipper $SPX dumping is what could go wrong.	negative
RT @CyclesFan: $SPX provided clarity today with the close below the 20 day MA after failing to break above 3155 on Tuesday. It's now likely…	negative
RT @Lakshmi_888: #Harmonics #Charts #trading $SPX #SPX #ES_F $ES $ES_F $SPY $DOW #DOW $RUT #DAX #FTSE $NQ #NQ $qqq $Nasdaq has hit the abs…	neutral
$spy $spx gonna roll out a June PT list tomorrow/maybe tonight	neutral
RT @jmllubber: @kerberos007 They also bought $AMD and $INTC incredibly hard, took them to YTD and ATH Those 2 semi names got beaten hard to…	negative
DA Davidson Downgrades First Bancorp $FBNC to Neutral https://t.co/BI5VmT7SuN #stocks	negative
Ranked by Mkt cap, they’d be in the $SPX top 25... https://t.co/Zw8wGNqCoL	positive
$SPX $SPY Nice coil break to the upside... measures recent highs https://t.co/Ra9zHrmYIw	positive
Watch list names have been posted today. 12 in total. I added more than usual to accommodate for different account sizes. Also some stocks work better for #options vs #stocks. Pick the set ups that look most interesting to you. Stay Humble, Stay Hungry. Trade like an Assassin. https://t.co/sgDgxgsKUj	positive
RT @realstock100: #SHI. Double bottom in, at all time lows and building industry back in business, grab yourself a bargain. Just confirmed…	negative
7 1/2 Weeks https://t.co/4ndC4oguzJ $SPX $SPY #ES_F	neutral
$SPX is correcting cycle from the 3401.6 peak, it can see more short term strength before turn happens. Find more at https://t.co/qMiVjC7Ewp #elliottwave #trading #SPX	positive
RT @facts_tesla: On $TSLA's 10-year anniversary as a public company, its market cap nearly caught Exxon-Mobil's, which was 123 times bigger…	neutral
The best thing abo it the stock market is prices rise and fall when the retail investor can’t touch it...GILD and Moderna will be priced in before premarket and the big boys got their share $SPX $SPY #DowJones	positive
When we see leaders $MSFT $AMZN keep hitting new ATHs $AAPL near ATH $NFLX ATH ... $NVDA ATH what does it mean??? BTD BTD BTD mrkt !	negative
Flush ALREADY! 😊 $SPY $SPX $QQQ $IWM $DJI $AAPL $TSLA $FB $AMZN $GS $JPM $BAC $C $GOOGL $SPOT $XLE $BA $BABA $UVXY $LYFT $CMG #ES_F #STOCKMARKET $ZM $MA #STONKS #STOCKSTOWATCH #PENNYSTOCKS https://t.co/gJDSaHNzdE	neutral
Some other names I will be watching like a hawk ⬇ $ZTO $RNG $SGEN $BABA $FNV $MSFT $NVDA $QDEL $CHWY #StocksToTrade #stockstowatch #MarketofStocks #qqq #spy #spx https://t.co/wdr1Z4DxX7	neutral
RT @kpak82: $SPX If trading was easy as going long on a golden cross... https://t.co/zHI8QfG6aA	positive
RT @AnthonyQuintano: This is Facebook stock right now $FB https://t.co/O4JubFiEA0	neutral
$W Wayfair red and my favorite risk reward short Generates negative free cash flow Went from $2 billion market cap pre pandemic to $21 billion now $AMZN is 1 click away from destroying their biz model and some pretty creepy allegations about $W on social media	neutral
$GOOG #patent 20200127702 Data over Power Line Design #tech #IP #research https://t.co/0AnI8JcFQ3	neutral
Mon Jun 22nd Today's BEST performing sector at the close Technology +1.7% follow along here: https://t.co/wmvpZKUxmG #technology #trading #bubbleboard #stocktrading #investing $AVGO $FIS $NVDA $SAP $MSFT $ACN $QCOM $TXN $CSCO $IBM	positive
Q3 2020 EPS Estimates for Ball Co. $BLL Increased by Analyst https://t.co/8kanBWunUH #stocks	positive
RT @MightySoldiers: #DayTrading #livestream Live Benzinga Pro and Trade Ideas scans! #stocks #invest #daytrade #stockmarket https://t.co/v…	neutral
$UNH - UnitedHealth beats EPS consensus, reiterates guidance https://t.co/sP7mh4e3dS	neutral
#stocks back from the recovery room: https://t.co/6hvvlWwOdU Fair value: 57€ Fairly priced Average yearly return: +27% https://t.co/npXwy7CHFR	positive
RT @MacroCharts: Breadth – expanding last week's discussion: More than half of $SPX Stocks are still down &gt;20% from their highs. Other in…	positive
RT @MawsonResource: Rompas-Rajapalot: A Big New Camp. Rajapalot average hole depth 136 metres (65.5km) 85% DDH in last 3 seasons. #HighGrad…	neutral
$AAPL $QQQ Top may now be in. https://t.co/iNKWb0TXUS	positive
GLG Partners LP short position in HILTON FOOD GROUP PLC down -0.13% to 0.76% #HFG $HFG #LSE #StockMarket #Stocks #Shares #Business #Markets #Trading #News #Investing #ShortSqueeze https://t.co/vM411LdLkR	negative
